# Supplementary material for: Synthesis and conformational studies of peptides from new C-linked carbo-β-amino acids (β-Caas) with anomeric methylamino- and difluorophenyl moieties
Source: Royal Society of Chemistry journal article supplement (doi:10.1039/b810817j), 2008-01-01
Supplement: b810817j_b.pdf [file b810817j_b.pdf]

## Supporting Information II

### Conformational analysis of peptides **15** and **16**:

$^1\text{H}$  NMR spectra of tetra peptide **15** showed a well dispersed spectrum in both amide and alpha regions. Down field resonance for NH-2 and NH-3 which is  $>7$  indicated that they have participated in intramolecular hydrogen bonding. Solvent titration studies confirmed their participation in H-bonding as they showed  $<3.5$  ppm change in chemical shift values. The  $^3J_{\text{NH-C}\beta\text{H}} > 8.5$  Hz for all the four residues, suggest that NH and  $\text{C}\beta\text{H}$  protons are in *ap* arrangement, corresponding to  $\text{CO-N-C}\beta\text{-C}\alpha(\phi) \sim \pm 120^\circ$ .  $^3J_{\text{C}\alpha\text{H-C}\beta\text{H}} > 10$  Hz and  $< 5$  Hz very clearly demonstrated the presence of predominantly a single conformation around  $\text{C}\alpha\text{-C}\beta$  ( $\theta$ ). The characteristic nOes for 12/10 helix which are  $\text{C}\beta\text{H}(1)/\text{NH}(3)$ ,  $\text{C}\beta\text{H}(1)/\text{C}\alpha\text{H}_{(\text{pro-R})}(3)$  and  $\text{NH}(2)/\text{NH}(3)$  observed from ROESY spectrum qualifies the proposed 12/10 helical structure.

$^1\text{H}$  NMR spectra of hexa peptide **16**, the extended structure of **15**, highly dispersed in the amide and  $\text{C}\alpha\text{H}$  region, with chemical shift ( $\delta$ ) dispersion of 2.59 and 0.71 ppm respectively, indicate the presence of a well defined structure. Down field resonance for NH-2, NH-3, NH-4 and NH-5 which is  $>7$  indicated that they have participated in intramolecular hydrogen bonding. Solvent titration studies confirmed their participation in H-bonding as they showed  $<3.6$  ppm change in chemical shift values. The observation of  $J_{\text{NH-C}\beta\text{H}} > 8.5$  Hz and  $J_{\text{C}\alpha\text{H-C}\beta\text{H}} > 10$  Hz and  $< 5$  Hz and distinct NOe correlations indicate,  $\phi \sim 120^\circ$  and  $\theta \sim 60^\circ$  respectively. Apart from the hydrogen bonded NHs resulted from titration studies and derived dihedral angles from  $^1\text{H}$  NMR coupling constants and the observation of nOes  $\text{C}\beta\text{H}(1)/\text{NH}(3)$ ,  $\text{C}\beta\text{H}(1)/\text{C}\alpha\text{H}_{(\text{pro-R})}(3)$ ,  $\text{C}\beta\text{H}(3)/\text{NH}(5)$ ,  $\text{C}\beta\text{H}(3)/\text{C}\alpha\text{H}_{(\text{pro-R})}(5)$ ,  $\text{NH}(2)/\text{NH}(3)$  and  $\text{NH}(4)/\text{NH}(5)$  from ROESY experiment provide compelling evidence for the presence of extended 12/10-helix for the peptide **16**.

## Experimental Section:

**(1R)-1-[(3aS,4R,6R,6aS)-6-(2,4-Difluorophenyl)-6-hydroxy-2,2-dimethylperhydrofuro[3,4-d][1,3]dioxol-4-yl]ethane-1,2-diol (47):** A mixture of **46** (12.26 g, 32.9 mmol) and 60% aq. AcOH (85 mL) was stirred at room temperature for 6 h. The reaction mixture was neutralized with solid NaHCO<sub>3</sub> and sat. aq. NaHCO<sub>3</sub> solution (pH = 7) and extracted with EtOAc (3 x 300 mL). Organic layers were dried (Na<sub>2</sub>SO<sub>4</sub>), evaporated and residue purified the by column chromatography (Silica gel, 50% EtOAc in petroleum ether) to give **47** (8.16 g, 75%) as a colorless syrup; IR (neat): 3390, 2986, 2939, 1618, 1466, 1378, 1212, 1035, 893 cm<sup>-1</sup>; <sup>1</sup>H NMR (CDCl<sub>3</sub>, 300 MHz): δ 7.49 (m, 1H, Ar-H), 6.91-6.79 (m, 2H, Ar-H), 4.96 (m, 2H, C<sub>2</sub>H, C<sub>3</sub>H), 4.30 (m, 1H, C<sub>6</sub>H), 3.90-3.87 (m, 3H, C<sub>6</sub>H, C<sub>4</sub>H, C<sub>5</sub>H), 1.29 (s, 3H, Me), 1.24 (s, 3H, Me); <sup>13</sup>C NMR (CDCl<sub>3</sub>, 75 MHz): δ 162.2, 161.3, 133.3 (4C), 113.1, 86.8, 79.6, 79.5, 78.8, 69.5, 63.9, 25.8, 25.0; HRMS (ESI): *m/z* calculated for C<sub>15</sub>H<sub>18</sub>O<sub>6</sub>F<sub>2</sub> (M<sup>+</sup>+Na) 355.0969, found 355.0976.

**Methyl (3S)-3-[(3aS,4R,6S,6aR)-6-(2,4-difluorophenyl)-2,2-dimethylperhydrofuro [3,4-d][1,3]dioxol-4-yl]-3-(benzylamino)propanoate (51) and methyl (3R)-3-[(3aS,4R,6S,6aR)-6-(2,4-difluorophenyl)-2,2-dimethylperhydrofuro [3,4-d][1,3]dioxol-4-yl]-3-(benzylamino)propanoate (52):** A mixture of **50** (6 g, 17.6 mmol) and benzylamine (4.81 mL, 44.1 mmol), as described for **24/25**, was stirred at room temperature for 12 h and purified the reaction mixture by column chromatography. First eluted (Silica gel, 15% EtOAc in petroleum ether) was **52** (1.57 g, 20%) as a pale yellow syrup; [α]<sub>D</sub> = +149.02 (*c* 0.75, CHCl<sub>3</sub>); IR (Neat): 3356, 2988, 2938, 2838, 2833, 1736, 1438, 1375, 1194, 1097, 744 cm<sup>-1</sup>; <sup>1</sup>H NMR (CDCl<sub>3</sub>, 300 MHz): δ 7.44 (m, 1H, ArH), 7.38-7.19 (m, 5H, ArH), 6.88-6.75 (m, 2H, ArH), 4.91 (m, 1H, C<sub>1</sub>H), 4.88 (m, 1H C<sub>3</sub>H), 4.79 (m, 1H C<sub>2</sub>H), 3.94-3.65 (m, 4H, C<sub>4</sub>H, C<sub>β</sub>H, BnCH<sub>2</sub>), 3.66 (s, 3H, OMe), 2.86 (m, 1H, C<sub>α</sub>H), 2.67 (m, 1H, C<sub>α</sub>H), 1.44 (s, 3H, Me), 1.27 (s, 3H, Me); <sup>13</sup>C NMR (CDCl<sub>3</sub>, 150 MHz): δ 172.9, 162.0, 160.4, 128.2 (10C), 112.7-111.4 (3C), 82.9, 81.5, 80.7, 76.6 (2C), 51.4, 25.1, 24.3; HRMS (ESI): *m/z* calculated for C<sub>24</sub>H<sub>28</sub>NO<sub>5</sub>F<sub>2</sub> (M<sup>+</sup>+H) 448.1935, found 448.1929.

Second eluted (Silica gel, 20% EtOAc in petroleum ether) was **51** (3.22 g, 41%) as a pale yellow syrup; [α]<sub>D</sub> = 171.4 (*c* 0.33, CHCl<sub>3</sub>); IR (Neat): 3370, 2991, 2937, 2899, 1739, 1444, 1160, 1087, 1020, 738 cm<sup>-1</sup>; <sup>1</sup>H NMR (CDCl<sub>3</sub>, 500 MHz): δ 7.45 (m, 1H,

Difluorophenyl), 7.39-7.20 (m, 5H, Ar-H), 6.89-6.77 (m, 2H, Difluorophenyl), 4.93 (d, 1H,  $J = 3.9$  Hz, C<sub>1</sub>H), 4.85 (dd, 1H,  $J = 3.4, 6.1$  Hz, C<sub>3</sub>H), 4.80 (dd, 1H,  $J = 3.7, 6.1$  Hz, C<sub>2</sub>H), 3.97 (d, 1H,  $J = 13.2$  Hz, BnCH<sub>2</sub>), 3.91 (d, 1H,  $J = 13.2$  Hz, BnCH<sub>2</sub>), 3.80 (dd, 1H,  $J = 3.4, 8.2$  Hz, C<sub>4</sub>H), 3.70 (s, 3H, COOMe), 3.60 (m, 1H, C<sub>β</sub>H), 2.83 (dd, 1H,  $J = 4.9, 15.2$  Hz, C<sub>α</sub>H), 2.62 (dd, 1H,  $J = 5.8, 15.2$  Hz, C<sub>α</sub>H), 1.43 (s, 3H, Me), 1.23 (s, 3H, Me); <sup>13</sup>C NMR (CDCl<sub>3</sub>, 75 MHz):  $\delta$  172.7, 162.0, 159.7, 128.3-128.1(10C), 112.9-111.4 (3C), 83.6, 81.7, 80.7, 76.9 (2C), 51.5, 25.2, 24.4; HRMS (ESI):  $m/z$  calculated for C<sub>24</sub>H<sub>28</sub>NO<sub>5</sub>F<sub>2</sub> (M<sup>+</sup>+H) 448.1935, found 448.1924.

**Boc-(S)- $\beta$ -Caa(diFP)-OCH<sub>3</sub> (3):** A mixture of **51** (3.5 g, 7.82 mmol) in methanol (10 mL) was treated with 10% Pd-C (0.35 g) as described for **26** gave *methyl (3S)-3-[(3aS,4R,6S,6aR)-6-(2,4-difluorophenyl)-2,2-dimethylperhydrofuro [3,4-d][1,3]dioxol-4-yl]-3-aminopropanoate (53)* as a yellow liquid, which was used as such for the next reaction.

A solution of **53** (2.80 g, 7.84 mmol) and Et<sub>3</sub>N (2.7 mL, 19.6 mmol) in CH<sub>2</sub>Cl<sub>2</sub> (20 mL) was treated with Boc<sub>2</sub>O (1.8 mL, 7.84 mmol) as described for **5** gave **3** (3.2 g, 89%) as a white solid; m.p. 112-115 °C,  $[\alpha]_D = +21.9$  ( $c$  1.3, CHCl<sub>3</sub>); IR (Neat): 3443, 2979, 1712, 1626, 1500, 1371, 1206, 1108, 993 cm<sup>-1</sup>; <sup>1</sup>H NMR (CDCl<sub>3</sub>, 303K, 500 MHz):  $\delta$  7.24 (m, 1H, Ar-H), 6.88-6.86 (m, 2H, Ar-H), 5.30 (d, 1H,  $J = 8.1$  Hz, NH), 4.98 (d, 1H,  $J = 3.7$  Hz, C<sub>1</sub>H), 4.81 (dd, 1H,  $J = 3.5, 6.2$ , Hz, C<sub>3</sub>H), 4.80 (d, 1H,  $J = 3.7$  Hz, C<sub>2</sub>H), 4.50 (dddd, 1H,  $J = 4.8, 6.4, 6.7, 8.1$  Hz, C<sub>β</sub>H), 3.87 (dd, 1H,  $J = 3.5, 4.8$  Hz, C<sub>4</sub>H), 3.68 (s, 3H, COOMe), 2.86 (dd, 1H,  $J = 6.7, 16.1$  Hz, C<sub>α</sub>H), 2.80 (dd, 1H,  $J = 6.4, 16.1$  Hz, C<sub>α</sub>H), 1.47 (s, 3H, Me), 1.45 (s, 9H, Boc), 1.25 (s, 3H, Me); <sup>13</sup>C NMR (CDCl<sub>3</sub>, 75 MHz):  $\delta$  171.2, 163.0, 159.6, 155.4, 129.8, 129.6 (2C), 129.5, 113.0, 111.8, 111.4, 81.6, 81.1, 80.3, 79.2, 76.6, 46.9, 28.4 (3C), 25.1, 24.1; HRMS (ESI):  $m/z$  calculated for C<sub>22</sub>H<sub>29</sub>NO<sub>7</sub>F<sub>2</sub> (M<sup>+</sup>+Na) 480.1809, found 480.1830.

**Boc-(R)- $\beta$ -Caa(diFP)-OCH<sub>3</sub> (4):** A solution of **52** (1 g, 2.23 mmol) in methanol (5 mL) was treated with 10% Pd-C (0.10 g) as described for **26** to give *methyl (3R)-3-[(3aS,4R,6S,6aR)-6-(2,4-difluorophenyl)-2,2-dimethylperhydrofuro [3,4-d][1,3]dioxol-4-yl]-3-aminopropanoate (54)* as a syrup, which was used as such for the next reaction.

As described for the synthesis of **5**, a solution of **54** (0.79 g, 2.22 mmol) in CH<sub>2</sub>Cl<sub>2</sub> (20 mL) was treated with Boc<sub>2</sub>O (0.50 mL, 2.22 mmol) and Et<sub>3</sub>N (0.77 mL, 5.5

mmol) in CH<sub>2</sub>Cl<sub>2</sub> (30 mL) to give **4** (0.95 g, 94%) as a yellow syrup;  $[\alpha]_D = +139.8$  (*c* 0.6, CHCl<sub>3</sub>); IR (Neat): 3437, 2922, 1736, 1627, 1468, 1372, 1270, 1167, 995 cm<sup>-1</sup>; <sup>1</sup>H NMR (CDCl<sub>3</sub>, 500 MHz): δ 7.24 (m, 1H, Ar-H), 6.87-6.82 (m, 2H, Ar-H), 5.56 (d, 1H, *J* = 8.7 Hz, NH), 4.95 (d, 1H, *J* = 4.0 Hz, C<sub>1</sub>H), 4.85 (dd, 1H, *J* = 6.1, 3.5 Hz, C<sub>3</sub>H), 4.79 (dd, 1H, *J* = 6.1, 4.0 Hz, C<sub>2</sub>H), 4.53 (m, 1H, C<sub>β</sub>H), 3.84 (m, 1H, C<sub>4</sub>H), 3.69 (s, 3H, COOMe), 2.84 (m, 2H, C<sub>α</sub>H, C<sub>α</sub>H), 1.46 (s, 3H, Me), 1.45 (s, 9H, Boc), 1.27 (s, 3H, Me); <sup>13</sup>C NMR (CDCl<sub>3</sub>, 150 MHz): δ 172.2, 162.1, 160.4, 155.6, 129.6 (2C), 128.7, 127.8, 112.9, 111.6, 111.4, 81.4, 80.9 (2C), 79.2, 76.6, 47.1, 28.3 (3C), 25.0, 24.0; HRMS (ESI): *m/z* calculated for C<sub>22</sub>H<sub>29</sub>NO<sub>7</sub>F<sub>2</sub> (M<sup>+</sup>+Na) 480.1809, found. 480.1822.

**Boc-(S)-β-Caa(diFP)-OH (55)**: As described for **28**, a solution of **3** (0.65 g, 1.42 mmol) gave **55** (0.57 g, 90%) as a white solid, m.p. 55-59 °C;  $[\alpha]_D = +46.1$  (*c* 0.33, CHCl<sub>3</sub>); IR (Neat): 3442, 2982, 1715, 1627, 1507, 1471, 1272, 1166, 994 cm<sup>-1</sup>; <sup>1</sup>H NMR (CDCl<sub>3</sub>, 300 MHz): δ 7.24 (m, 1H, Ar-H), 6.90-6.85 (m, 2H, Ar-H), 5.42 (d, 1H, *J* = 8.7 Hz, NH), 4.99 (d, 1H, *J* = 4.0 Hz, C<sub>1</sub>H), 4.82 (m, 2H, C<sub>2</sub>H, C<sub>3</sub>H), 4.48 (m, 1H, C<sub>β</sub>H), 3.90 (m, 1H, C<sub>4</sub>H), 2.86 (m, 2H, C<sub>α</sub>H, C<sub>α</sub>H), 1.48 (s, 3H, Me), 1.46 (s, 9H, Boc), 1.27 (s, 3H, Me); <sup>13</sup>C NMR (CDCl<sub>3</sub>, 75 MHz): δ 176.0, 163.0, 159.6, 155.8, 129.8, 129.6 (2C), 129.5, 113.0, 111.8, 111.4, 81.6, 81.0, 80.3, 79.6, 46.7, 28.3 (3C), 25.1, 24.1; HRMS (ESI): *m/z* calculated for C<sub>21</sub>H<sub>27</sub>NO<sub>7</sub>F<sub>2</sub> (M<sup>+</sup>+Na) 466.1653, found 466.1644.

**Boc-(R)-β-Caa(diFP)-OH (56)**: As described for the synthesis of **28**, a solution of **4** (0.350 g, 0.765 mmol) gave **56** (0.33 g) in 97% yield as a white solid, m.p. 141-145 °C;  $[\alpha]_D = +187.1$  (*c* 0.35, CHCl<sub>3</sub>); IR (KBr): 3349, 2982, 1745, 1691, 1592, 1419, 1172, 994 cm<sup>-1</sup>; <sup>1</sup>H NMR (CDCl<sub>3</sub>, 300 MHz): δ 7.23 (m, 1H, Ar-H), 6.88-6.83 (m, 2H, Ar-H), 5.58 (d, 1H, *J* = 8.2 Hz, NH), 4.97 (d, 1H, *J* = 4.0 Hz, C<sub>1</sub>H), 4.87 (dd, 1H, *J* = 6.1, 3.4 Hz, C<sub>3</sub>H), 4.81 (dd, 1H, *J* = 6.1, 4.0 Hz, C<sub>2</sub>H), 4.54 (m, 1H, C<sub>β</sub>H), 3.88 (m, 1H, C<sub>4</sub>H), 2.89 (m, 2H, C<sub>α</sub>H, C<sub>α</sub>H), 1.50 (s, 3H, Me), 1.46 (s, 9H, Boc), 1.27 (s, 3H, Me); <sup>13</sup>C NMR (CDCl<sub>3</sub>, 150 MHz): δ 175.6, 162.2, 160.5, 155.8, 129.6 (4C), 113.0, 111.6, 111.5, 81.4, 80.8, 80.7, 79.6, 46.9, 28.3 (3C), 25.0, 24.1; HRMS (ESI): *m/z* calculated for C<sub>21</sub>H<sub>27</sub>NO<sub>7</sub>F<sub>2</sub> (M<sup>+</sup>+Na) 466.1653, found 466.1655.

**Boc-(S)- $\beta$ -Caa(diFP)-(R)- $\beta$ -Caa(diFP)-OH (60):** As described for **28**, a solution of **59** (0.3 g, 0.38 mmol) gave **60** (0.276 g, 94%) as a white solid, which was used as such for further reaction.

**Boc-[(S)- $\beta$ -Caa(diFP)-(R)- $\beta$ -Caa(diFP)]<sub>2</sub>-OH (62):** As described for **28**, a solution of **13** (0.13 g, 0.09 mmol) gave **62** (0.116 g, 91%) as a white solid, which was used as such for further reaction.

**Boc-(R)- $\beta$ -Caa(diFP)-(S)- $\beta$ -Caa(diFP)-OMe (63):** A mixture of **56** (0.3 g, 0.677 mmol), HOBT (0.109 g, 0.812 mmol) and EDCI (0.155 g, 0.81 mmol) in CH<sub>2</sub>Cl<sub>2</sub> (10 mL) was stirred at 0 °C for 15 min and treated with **57** (0.31 g, 0.677 mmol; obtained from **3** on exposure to TFA) and DIPEA (0.23 mL, 1.35 mmol) under nitrogen atmosphere for 8 h. Workup as described for **36** and purification by column chromatography (Silica gel, 60% EtOAc in petroleum ether) gave **63** (0.34 g, 64%) as a white solid. m.p. 105-106 °C;  $[\alpha]_D = +150.8$  (c 0.35, CHCl<sub>3</sub>); IR(KBr): 3435, 2982, 1732, 1628, 1507, 1376, 1207, 1108, 994 cm<sup>-1</sup>; <sup>1</sup>H NMR (CDCl<sub>3</sub>, 303K, 500 MHz):  $\delta$  7.27-7.17 (m, 2H, Ar-H), 6.89-6.81 (m, 4H, Ar-H), 6.52 (d, 1H,  $J = 7.8$  Hz, NH-2), 5.71 (d, 1H,  $J = 9.3$  Hz, NH-1), 4.94 (d, 1H,  $J = 3.4$  Hz, C<sub>1</sub>H-2), 4.88 (m, 1H, C<sub>3</sub>H-1), 4.82 (d, 1H,  $J = 4.1$  Hz, C<sub>1</sub>H-1), 4.77 (m, 2H, C<sub>3</sub>H, C<sub>2</sub>H-2), 4.75 (m, 1H, C <sub>$\beta$</sub> H-2), 4.62 (m, 1H, C<sub>2</sub>H-1), 4.49 (m, 1H, C <sub>$\beta$</sub> H-1), 3.90 (dd, 1H,  $J = 3.0, 5.8$  Hz, C<sub>4</sub>H-2), 3.85 (m, 1H, C<sub>4</sub>H-1), 3.67 (s, 3H, COOMe), 2.83 (m, 2H, C <sub>$\alpha$</sub> H, C <sub>$\alpha$</sub> H-2), 2.72 (dd, 1H,  $J = 6.3, 14.7$  Hz, C <sub>$\alpha$</sub> H-1), 2.62 (dd, 1H,  $J = 7.1, 14.7$  Hz, C <sub>$\alpha$</sub> H-1), 1.48 (s, 3H, Me), 1.44 (s, 9H, Boc), 1.43 (s, 3H, Me), 1.25 (s, 3H, Me), 1.21 (s, 3H, Me); <sup>13</sup>C NMR (CDCl<sub>3</sub>, 75 MHz):  $\delta$  172.0, 170.3, 163.0 (2C), 159.7 (2C), 155.8, 129.8-129.2 (8C), 113.0, 112.7, 111.8, 111.6, 111.5, 111.3, 81.6, 81.5, 80.8 (2C), 80.5, 80.2, 79.0, 76.6, 47.5, 45.8, 28.4 (3C), 25.2, 25.1, 24.2, 24.0; HRMS (ESI):  $m/z$  calculated for C<sub>38</sub>H<sub>46</sub>N<sub>2</sub>O<sub>11</sub>F<sub>4</sub> (M<sup>+</sup>+Na) 805.2935, found 805.2941.

**Boc-[(R)- $\beta$ -Caa(diFP)-(S)- $\beta$ -Caa(diFP)]<sub>2</sub>-OMe (15):** A mixture of **64** (0.1 g, 0.13 mmol), HOBT (0.020 g, 0.15 mmol) and EDCI (0.028 g, 0.15 mmol) in CH<sub>2</sub>Cl<sub>2</sub> (6 mL) was stirred at 0 °C for 15 min and treated with **65** (0.10 g, 0.13 mmol; obtained from **63** on exposure to TFA) and DIPEA (0.045 mL, 0.26 mmol) under nitrogen atmosphere for 8 h. Workup as described for **36** and purification by column chromatography (Silica gel 1.6% MeOH in CHCl<sub>3</sub>) afforded **15** (0.09 g, 48%) as a white solid; m.p. 82-85 °C;  $[\alpha]_D =$

+29.50 (c 0.95, CHCl<sub>3</sub>); IR(KBr): 3433, 2928, 1733, 1664, 1516, 1470, 1207, 1107, 996 cm<sup>-1</sup>; <sup>1</sup>H NMR (CDCl<sub>3</sub>, 303K, 500 MHz): δ 7.25-7.18 (m, 2H, Ar-H), 6.88-6.80 (m, 4H, Ar-H), 6.92 (d, 1H, NH-2), 5.83 (d, 1H, *J* = 9.2 Hz, NH-1), 4.96 (d, 1H, C<sub>1</sub>H-2), 4.95 (d, 1H, *J* = 3.8 Hz, C<sub>1</sub>H-1), 4.81 (m, 1H, C<sub>2</sub>H-1), 4.81 (m, 2H, C<sub>2</sub>H, C<sub>3</sub>H-2), 4.72 (m, 1H, C<sub>β</sub>H-2), 4.54 (m, 1H, C<sub>β</sub>H-1), 4.66 (dd, 1H, *J* = 4.0, 6.1 Hz, C<sub>2</sub>H-1), 3.96 (dd, 1H, C<sub>4</sub>H-2), 3.84 (m, 1H, C<sub>4</sub>H-1), 2.84 (m, 2H, C<sub>α</sub>H, C<sub>α</sub>H-2), 2.76 (m, 1H, C<sub>α</sub>H-1), 2.65 (dd, 1H, *J* = 7.5, 13.5 Hz, C<sub>α</sub>H-1), 1.48 (s, 6H, Me), 1.45 (s, 6H, Me), 1.44 (s, 9H, Boc), 1.26 (s, 12H, Me); <sup>13</sup>C NMR (CDCl<sub>3</sub>, 150 MHz): δ 172.2, 170.7, 170.2, 170.0, 162.1 (4C), 160.4 (4C), 156.6, 129.7-129.2 (16C), 112.9-112.6 (4C), 111.9-111.3 (8C), 81.8, 81.5, 81.4 (2C), 81.1, 80.9, 80.8, 80.6, 80.4, 79.9, 78.8, 76.6, 76.5, 48.8, 46.4, 46.2, 45.5, 28.4 (3C), 25.3 (2C), 25.0, 24.9, 24.5, 24.3, 24.0, 23.6; HRMS (ESI): *m/z* calculated for C<sub>70</sub>H<sub>80</sub>N<sub>4</sub>O<sub>19</sub>F<sub>8</sub> (M<sup>+</sup>+Na) 1455.5186, found 1455.5137.

**Boc-(*R*)-β-Caa(diFP)-(*S*)-β-Caa(diFP)-OH (64):** As described for **28**, a solution of **63** (0.13 g, 0.166 mmol) gave **64** (0.12 g, 95%) as a white solid, which was used as such for further reaction.

**Boc-[(*R*)-β-Caa(diFP)-(*S*)-β-Caa(diFP)]<sub>3</sub>-OCH<sub>3</sub> (16):** As described for **28**, a solution of **15** (0.07, 0.048 mmol) gave *Boc-[(*R*)-β-Caa(diFP)-(*S*)-β-Caa(diFP)]<sub>2</sub>-OH (66; 0.06 g, 87%) as a white solid, which was used as such for further reaction.*

A mixture of **66** (0.05 g, 0.035 mmol), HOBt (0.005 g, 0.04 mmol) and EDCI (0.008 g, 0.04 mmol) in CH<sub>2</sub>Cl<sub>2</sub> (6 mL) was stirred at 0 °C for 15 min and treated with **65** (0.027 g, 0.035 mmol) and DIPEA (0.01 mL, 0.07 mmol) under nitrogen atmosphere for 8 h. Workup as described for **36** and purification by column chromatography (Silica gel, 1.8% MeOH in CHCl<sub>3</sub>) afforded **16** (0.03 g, 41%) as a white solid; m.p. 151-153 °C; [α]<sub>D</sub> = +346.0 (c 0.20, CHCl<sub>3</sub>); IR(KBr): 3434, 2931, 2857, 1737, 1653, 1471, 1271, 1109, 998, 787; <sup>1</sup>H NMR (CDCl<sub>3</sub>, 303K, 500 MHz): δ 8.55 (d, 1H, *J* = 9.0 Hz, NH-5), 8.47 (d, 1H, *J* = 8.5 Hz, NH-3), 8.36 (d, 1H, *J* = 9.1 Hz, NH-2), 8.35 (d, 1H, *J* = 9.9 Hz, NH-4), 7.25-7.05 (m, 6H, Ar-H), 6.88-6.71 (m, 12H, Ar-H), 6.72 (m, 1H, NH-6), δ 5.96 (d, 1H, *J* = 10.1 Hz, NH-1), 5.24 (dd, 1H, *J* = 3.5, 6.0 Hz, C<sub>3</sub>H-4), 5.15 (dd, 1H, *J* = 3.5, 6.0 Hz, C<sub>3</sub>H-2), 4.96 (d, 1H, *J* = 4.2 Hz, C<sub>1</sub>H-6), 4.93 (m, 5H, C<sub>1</sub>H-1, C<sub>1</sub>H-2, C<sub>1</sub>H-3, C<sub>1</sub>H-5, C<sub>3</sub>H-5), 4.87 (m, 1H, C<sub>1</sub>H-4), 4.85 (m, 1H, C<sub>3</sub>H-1), 4.84 (m, 2H, C<sub>β</sub>H-3, C<sub>3</sub>H-3),

4.83 (m, 2H, C<sub>β</sub>H-5, C<sub>3</sub>H-5), 4.82 (m, 4H, C<sub>β</sub>H-2, C<sub>3</sub>H-2, C<sub>2</sub>H-6, C<sub>3</sub>H-6 ), 4.74 (m, 1H, C<sub>2</sub>H-1), 4.73 (m, 1H, C<sub>2</sub>H-5), 4.71 (m, 1H, C<sub>β</sub>H-6), 4.70 (m, 1H, C<sub>β</sub>H-1), 4.66 (dd, 1H, *J* = 4.4, 6.0 Hz, C<sub>2</sub>H-3), 4.63 (m, 1H, C<sub>β</sub>H-4), 3.97 (dd, 1H, *J* = 3.6, 8.0 Hz, C<sub>4</sub>H-6), 3.95 (dd, 1H, *J* = 3.5, 9.2 Hz, C<sub>4</sub>H-2), 3.87 (dd, 1H, *J* = 3.5, 9.5 Hz, C<sub>4</sub>H-4), 3.75 (m, 2H, C<sub>4</sub>H-1, C<sub>4</sub>H-3), 3.72 (s, 3H, COOMe), 3.71 (m, 1H, C<sub>4</sub>H-5), 3.01 (m, 2H, C<sub>α</sub>H<sub>(*pro-R*)</sub>-6, C<sub>α</sub>H<sub>(*pro-S*)</sub>-6), 2.95 (dd, 1H, *J* = 3.8, 12.0, Hz, C<sub>α</sub>H<sub>(*pro-S*)</sub>-3), 2.84 (m, 2H, C<sub>α</sub>H<sub>(*pro-S*)</sub>-1, C<sub>α</sub>H<sub>(*pro-S*)</sub>-5 ), 2.77 (dd, 1H, *J* = 3.7, 13.2 Hz, C<sub>α</sub>H<sub>(*pro-S*)</sub>-2), 2.69 (dd, 1H, *J* = 3.4, 12.6 Hz, C<sub>α</sub>H<sub>(*pro-S*)</sub>-4), 2.54 (dd, 1H, *J* = 5.0, 13.2 Hz, C<sub>α</sub>H<sub>(*pro-R*)</sub>-2), 2.50 (m, 1H, C<sub>α</sub>H<sub>(*pro-R*)</sub>-1), 2.49 (dd, 1H, *J* = 5.0, 12.6 Hz, C<sub>α</sub>H<sub>(*pro-R*)</sub>-4), 2.46 (dd, 1H, *J* = 10.8, 12.7 Hz, C<sub>α</sub>H<sub>(*pro-R*)</sub>-5), 2.30 (m, 1H, C<sub>α</sub>H<sub>(*pro-R*)</sub>-3), 1.51 (s, 3H, Me), 1.50 (s, 3H, Me), 1.47 (s, 9H, Boc), 1.47 (s, 3H, Me), 1.44 (s, 6H, Me), 1.37 (s, 3H, Me), 1.31 (s, 3H, Me), 1.27 (s, 3H, Me), 1.26 (s, 3H, Me), 1.23 (s, 3H, Me), 1.21 (s, 3H, Me), 1.20 (s, 3H, Me); <sup>13</sup>C NMR (CDCl<sub>3</sub>, 150 MHz): δ 172.4, 171.0, 170.9, 170.4, 170.1, 169.6, 162.1 (6C), 160.4 (6C), 156.9, 129.7-129.0 (24C), 113.1-111.2 (18C), 82.3-76.4 (20C), 49.6, 47.3, 47.1, 46.7, 46.6, 45.3, 28.3 (3C), 25.4, 25.3, 25.2, 25.0, 24.9, 24.8, 24.5, 24.4, 24.3, 23.9, 23.8, 23.7; HRMS (ESI): *m/z* calculated for C<sub>102</sub>H<sub>114</sub>N<sub>6</sub>O<sub>27</sub>F<sub>12</sub> (M<sup>+</sup>+Na) 2105.7432, found 2105.7457.

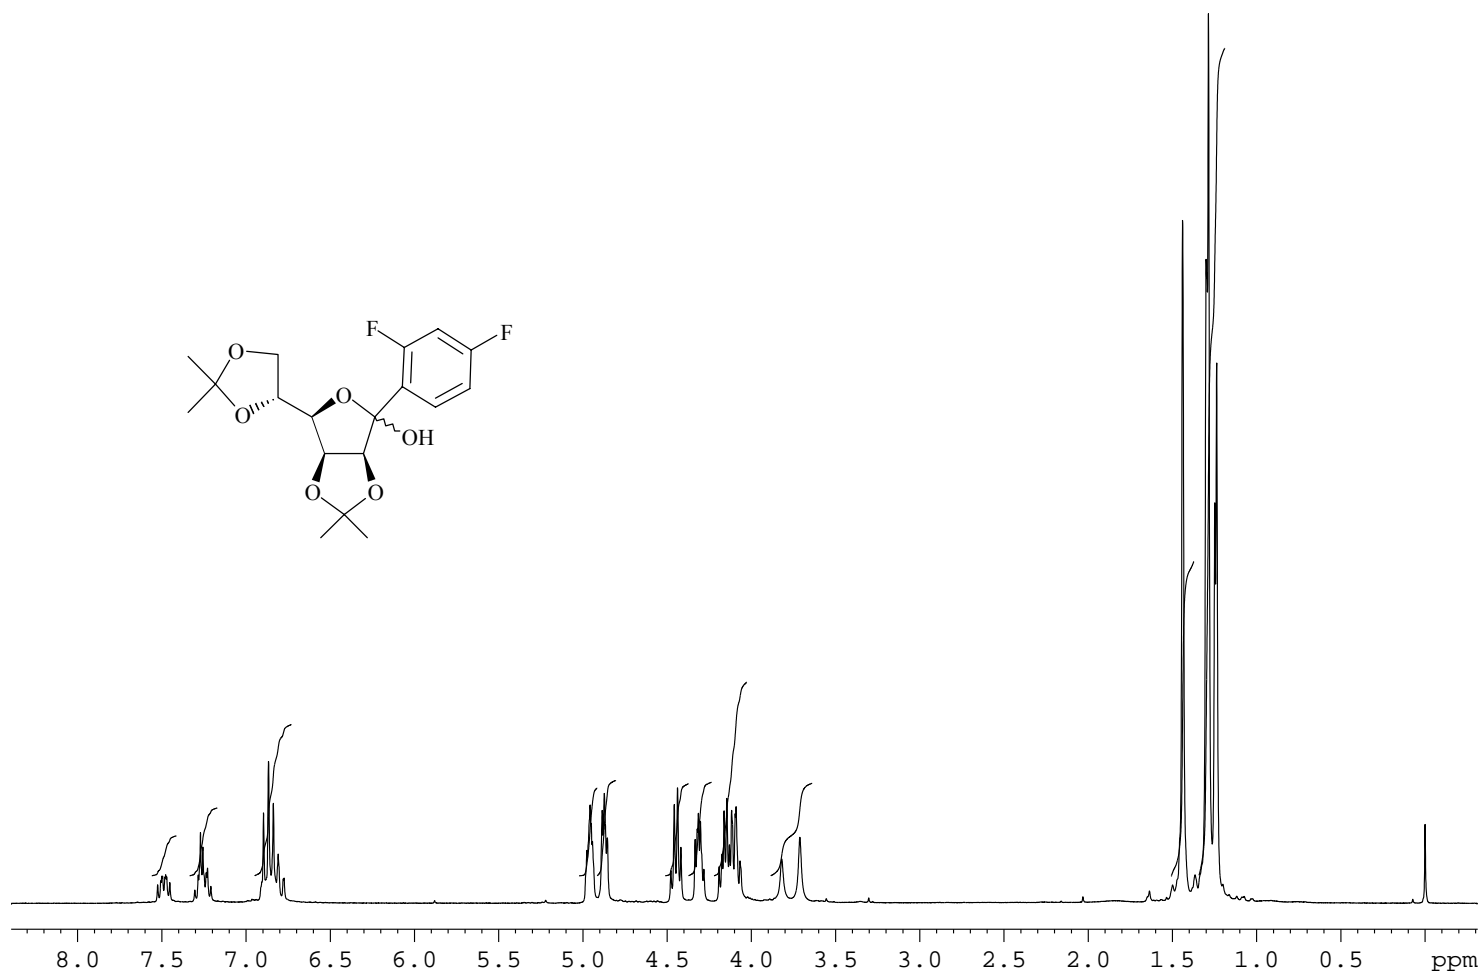

**Supporting Fig 65: <sup>1</sup>H NMR Spectrum of 46 (CDCl<sub>3</sub>, 294 K, 300 MHz)**



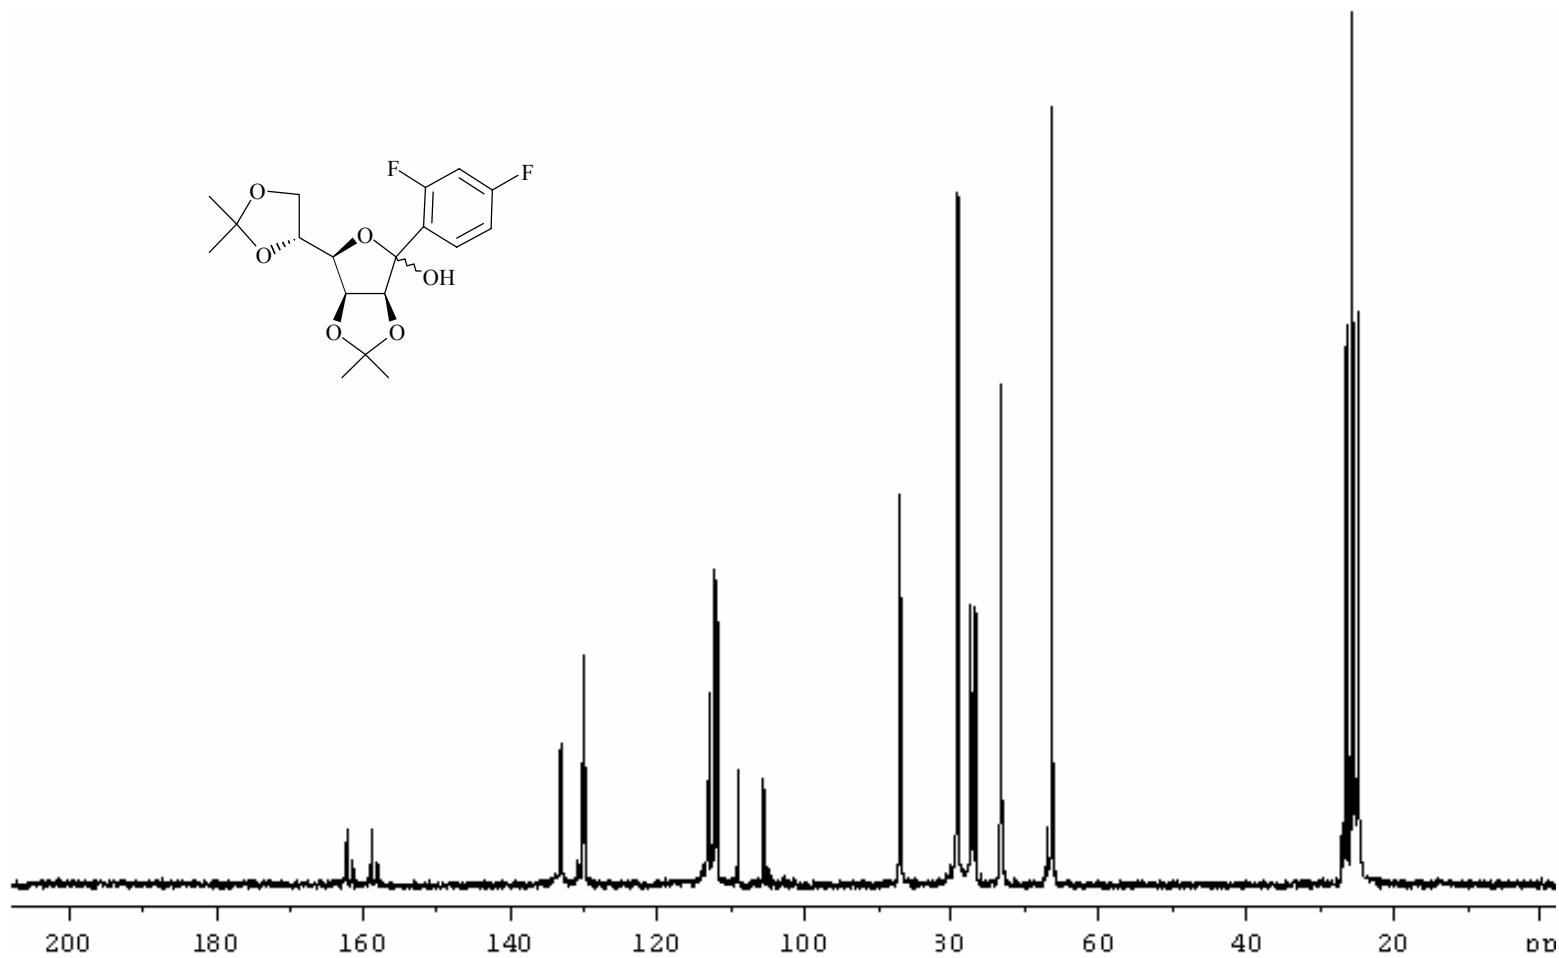

**Supporting Fig 66: <sup>13</sup>C NMR Spectrum of 46 (CDCl<sub>3</sub>, 294 K, 75 MHz)**

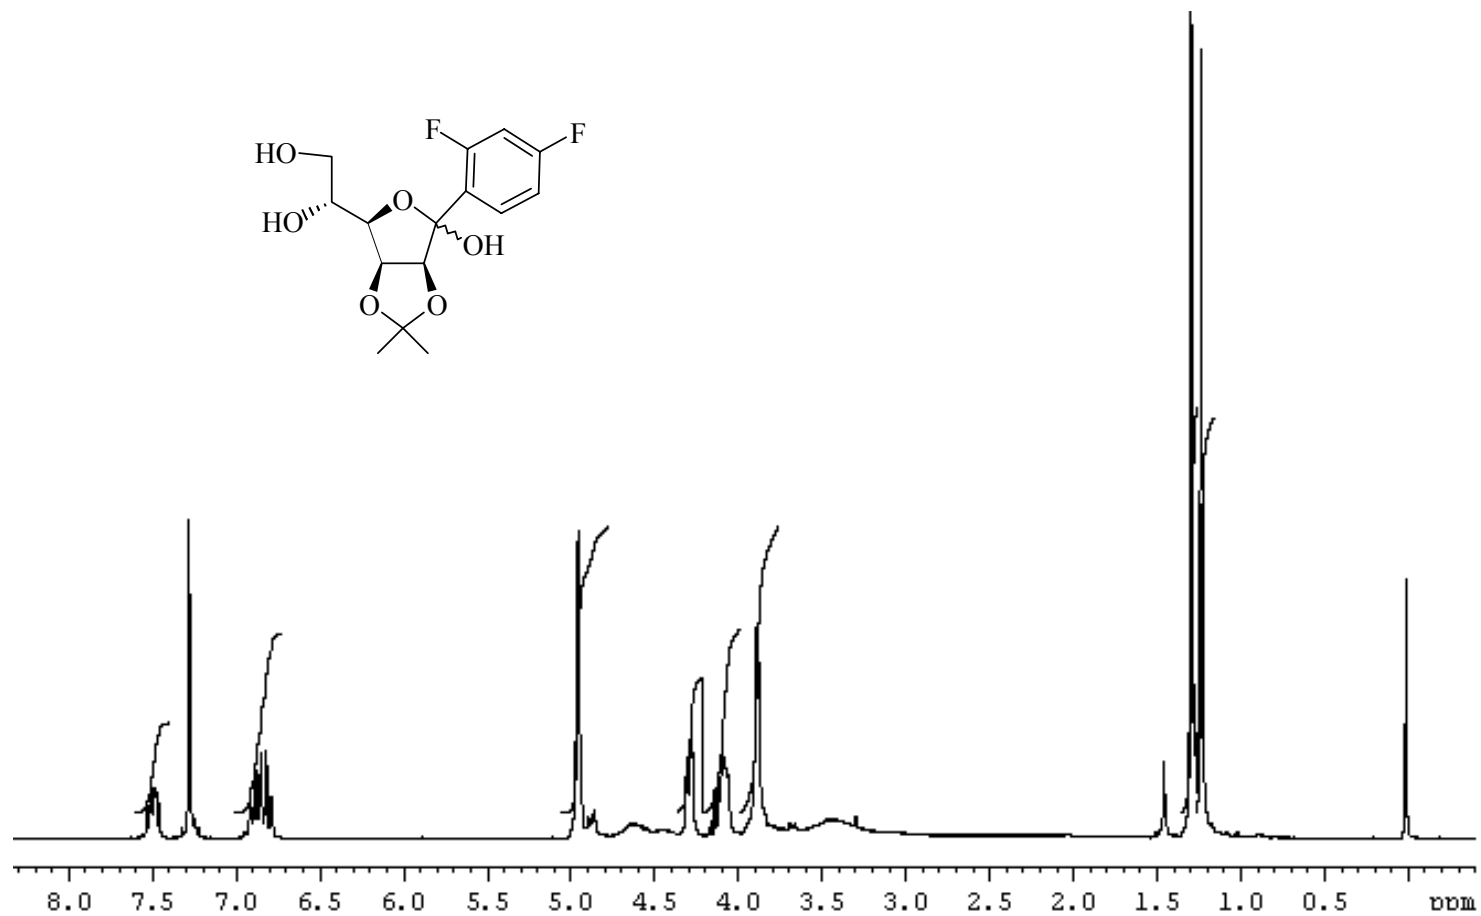

Supporting Fig 67: <sup>1</sup>H NMR Spectrum of 47 (CDCl<sub>3</sub>, 294 K, 300 MHz)

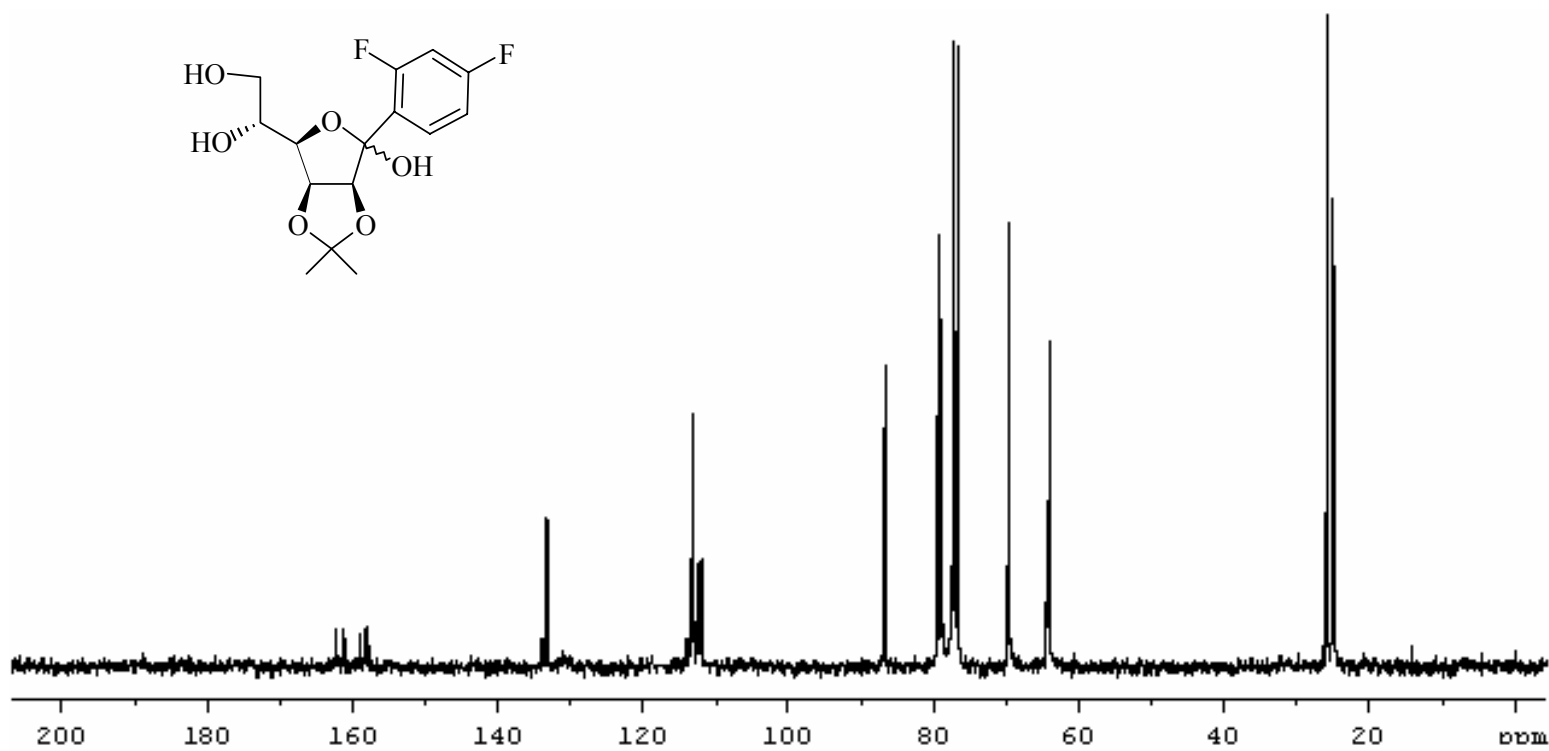

Supporting Fig 68: <sup>13</sup>C NMR Spectrum of 47 (CDCl<sub>3</sub>, 294 K, 75 MHz)

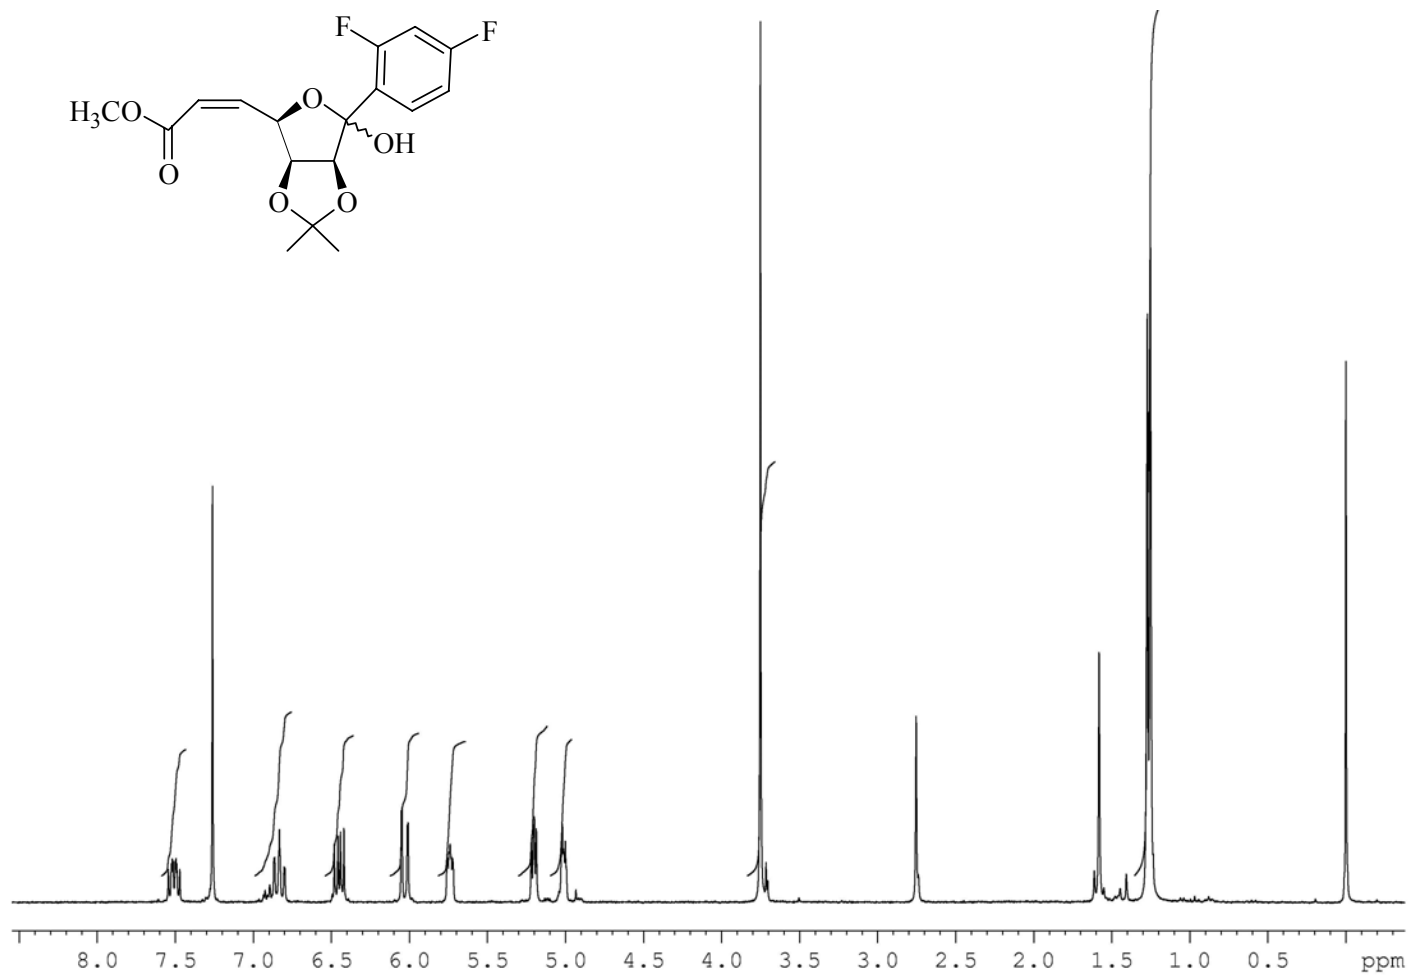

**Supporting Fig 69: <sup>1</sup>H NMR Spectrum of 49 (CDCl<sub>3</sub>, 294 K, 300 MHz)**

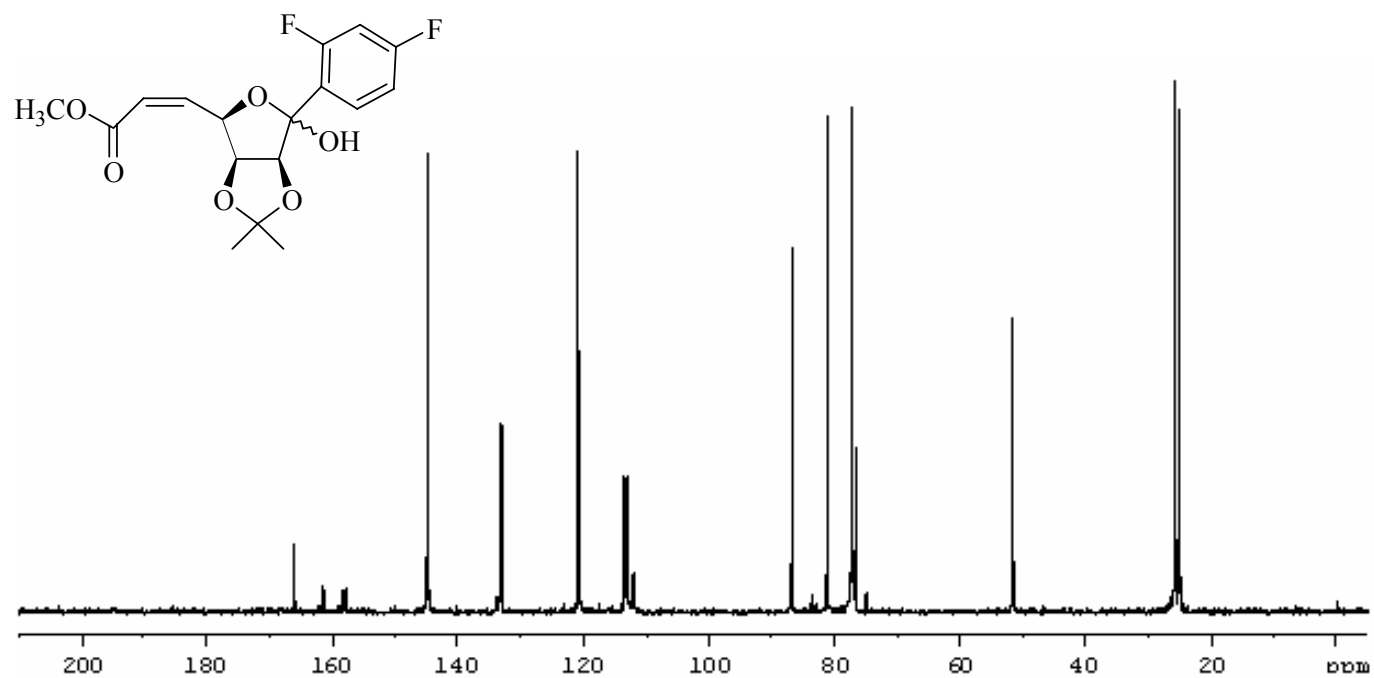

Supporting Fig 70:  $^{13}\text{C}$  NMR Spectrum of 49 ( $\text{CDCl}_3$ , 294 K, 75 MHz)

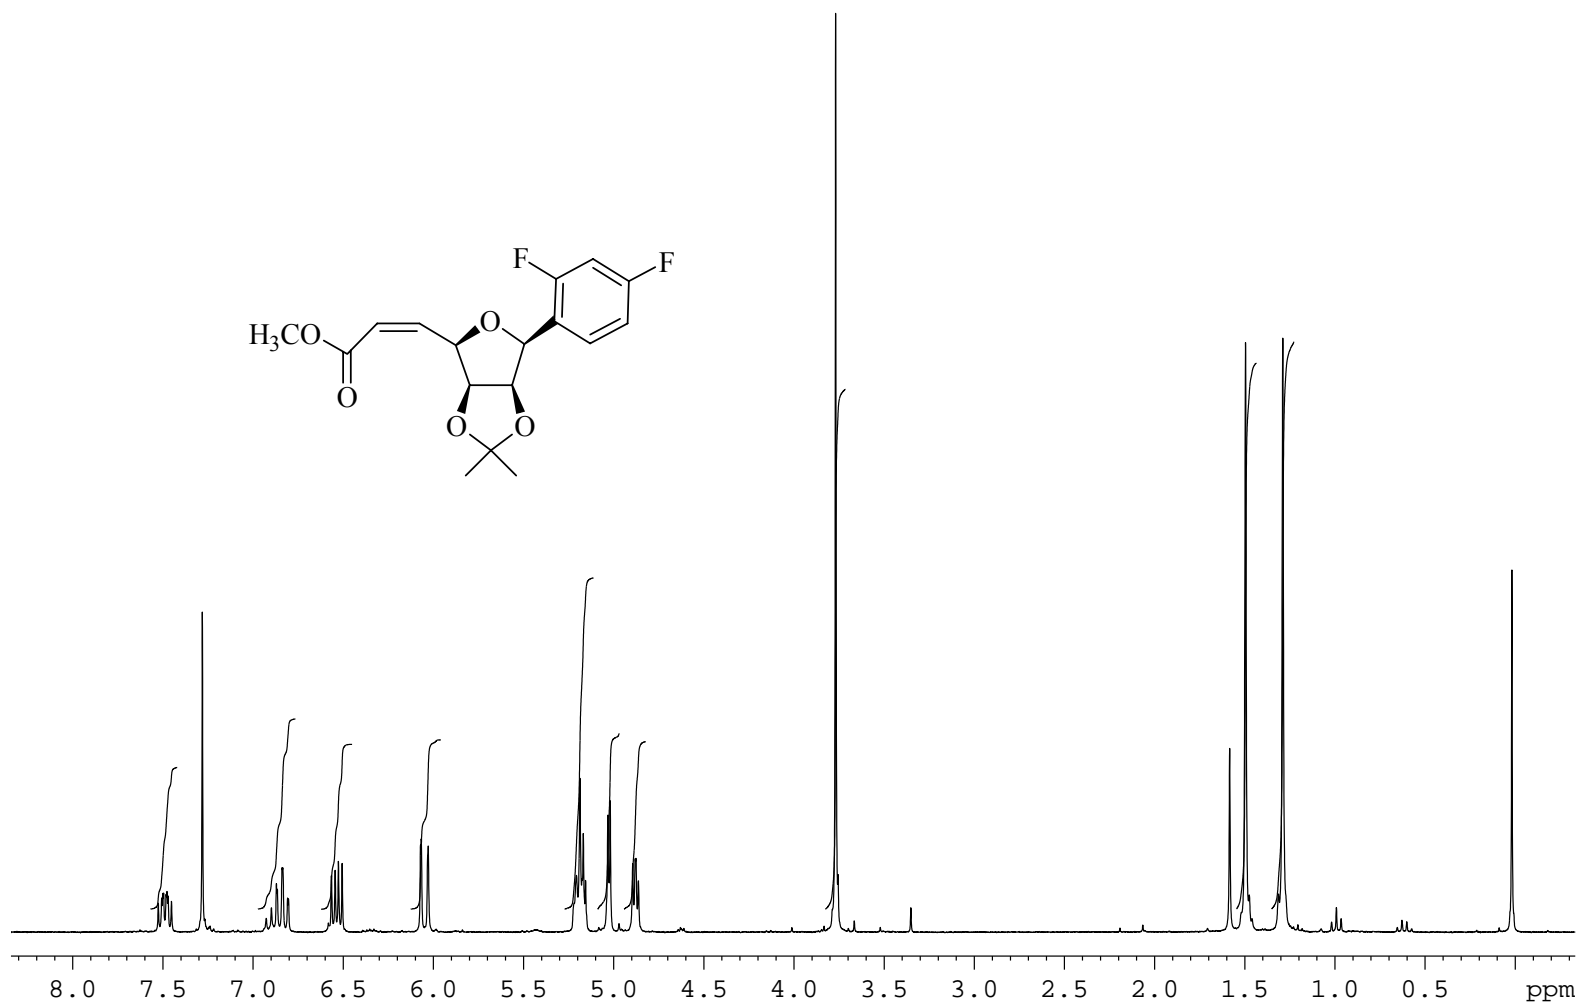

Supporting Fig 71: <sup>1</sup>H NMR Spectrum of 50 (CDCl<sub>3</sub>, 294 K, 300 MHz)

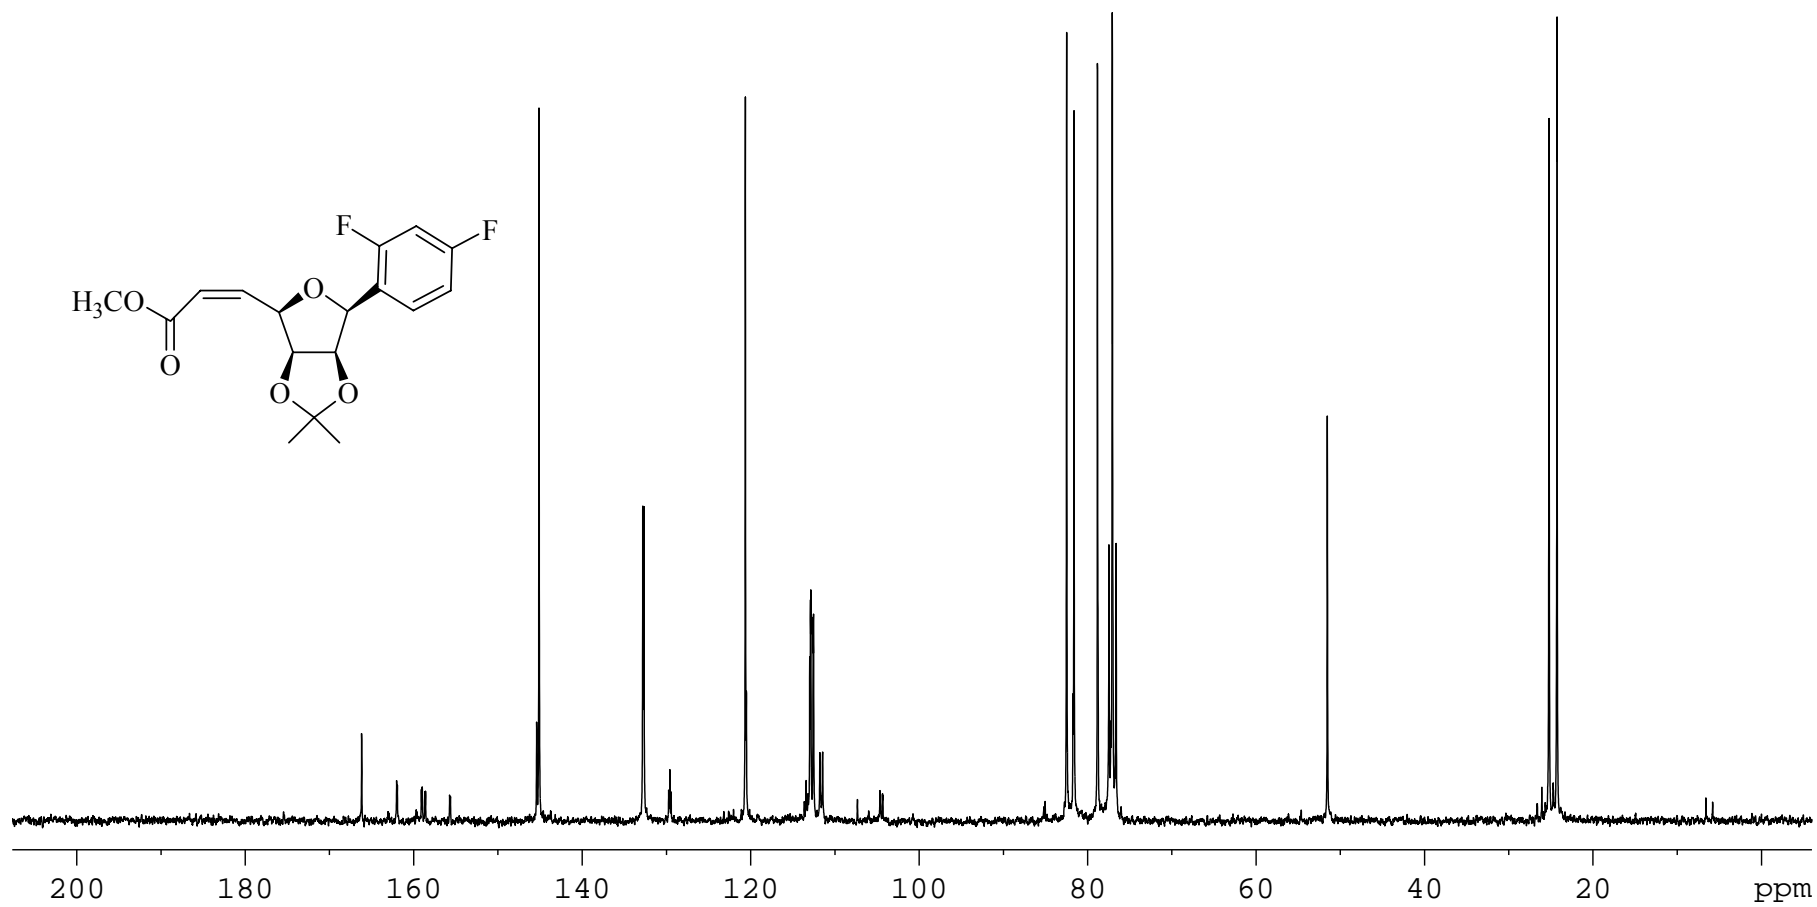

**Supporting Fig 72:  $^{13}\text{C}$  NMR Spectrum of 50 ( $\text{CDCl}_3$ , 294 K, 75 MHz)**

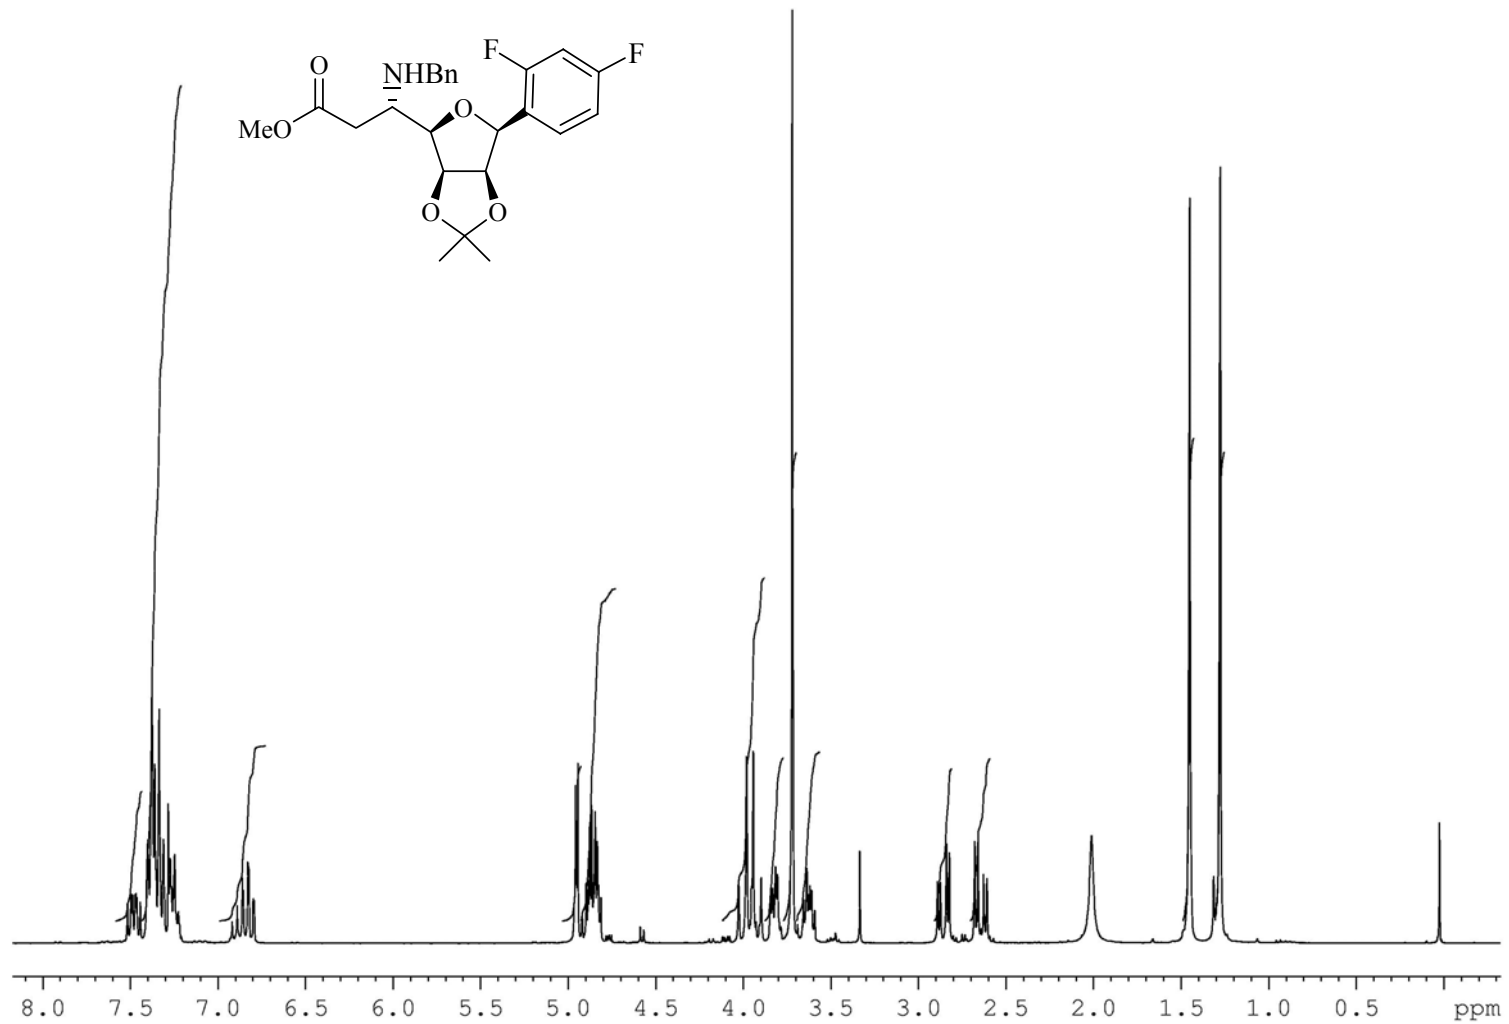

**Supporting Fig 73: <sup>1</sup>H NMR Spectrum of 51 (CDCl<sub>3</sub>, 294 K, 300 MHz)**



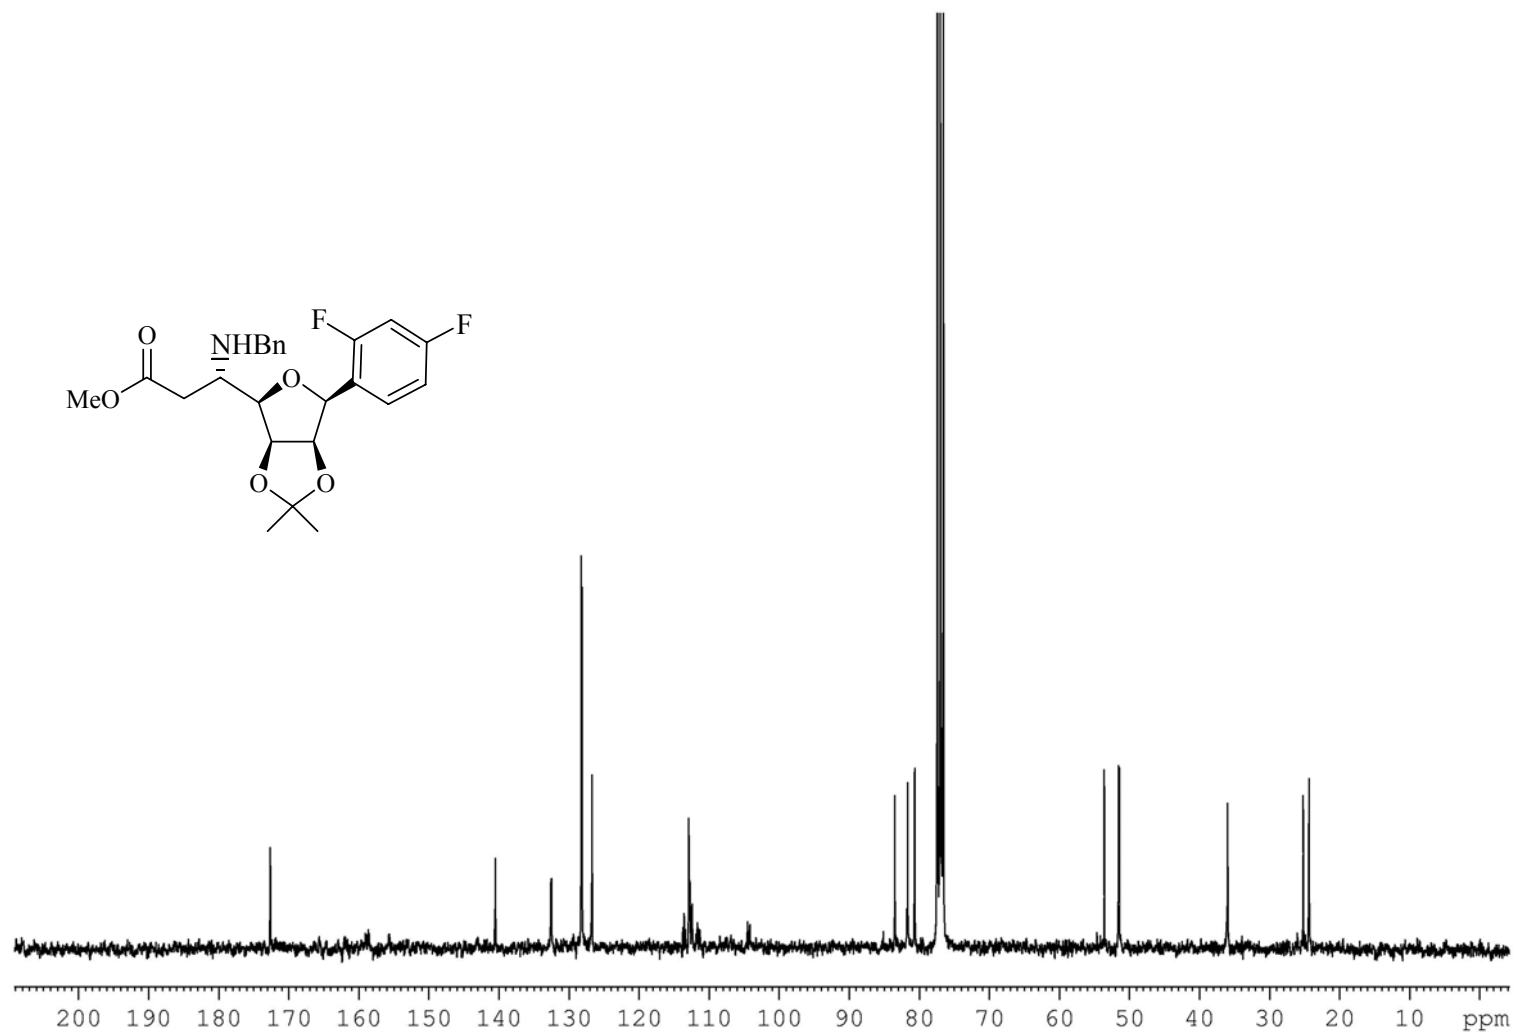

**Supporting Fig 74:  $^{13}\text{C}$  NMR Spectrum of 51 ( $\text{CDCl}_3$ , 294 K, 75 MHz)**

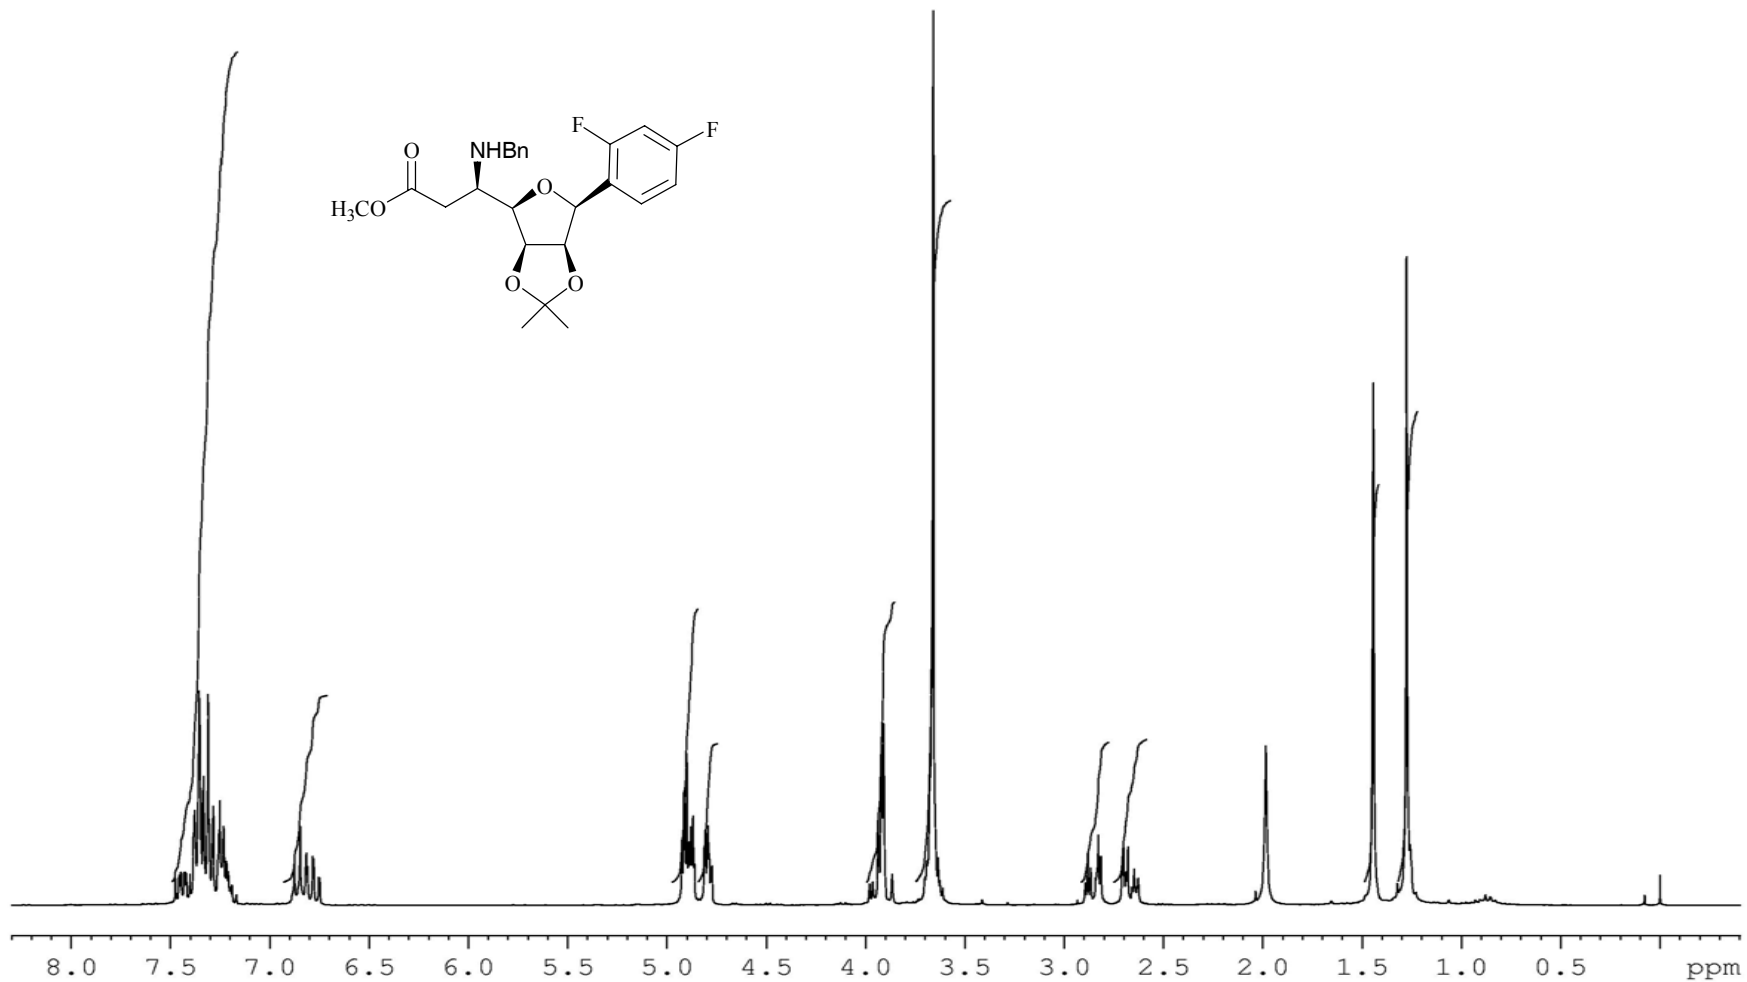

**Supporting Fig 75: <sup>1</sup>H NMR Spectrum of 52 (CDCl<sub>3</sub>, 294 K, 300 MHz)**

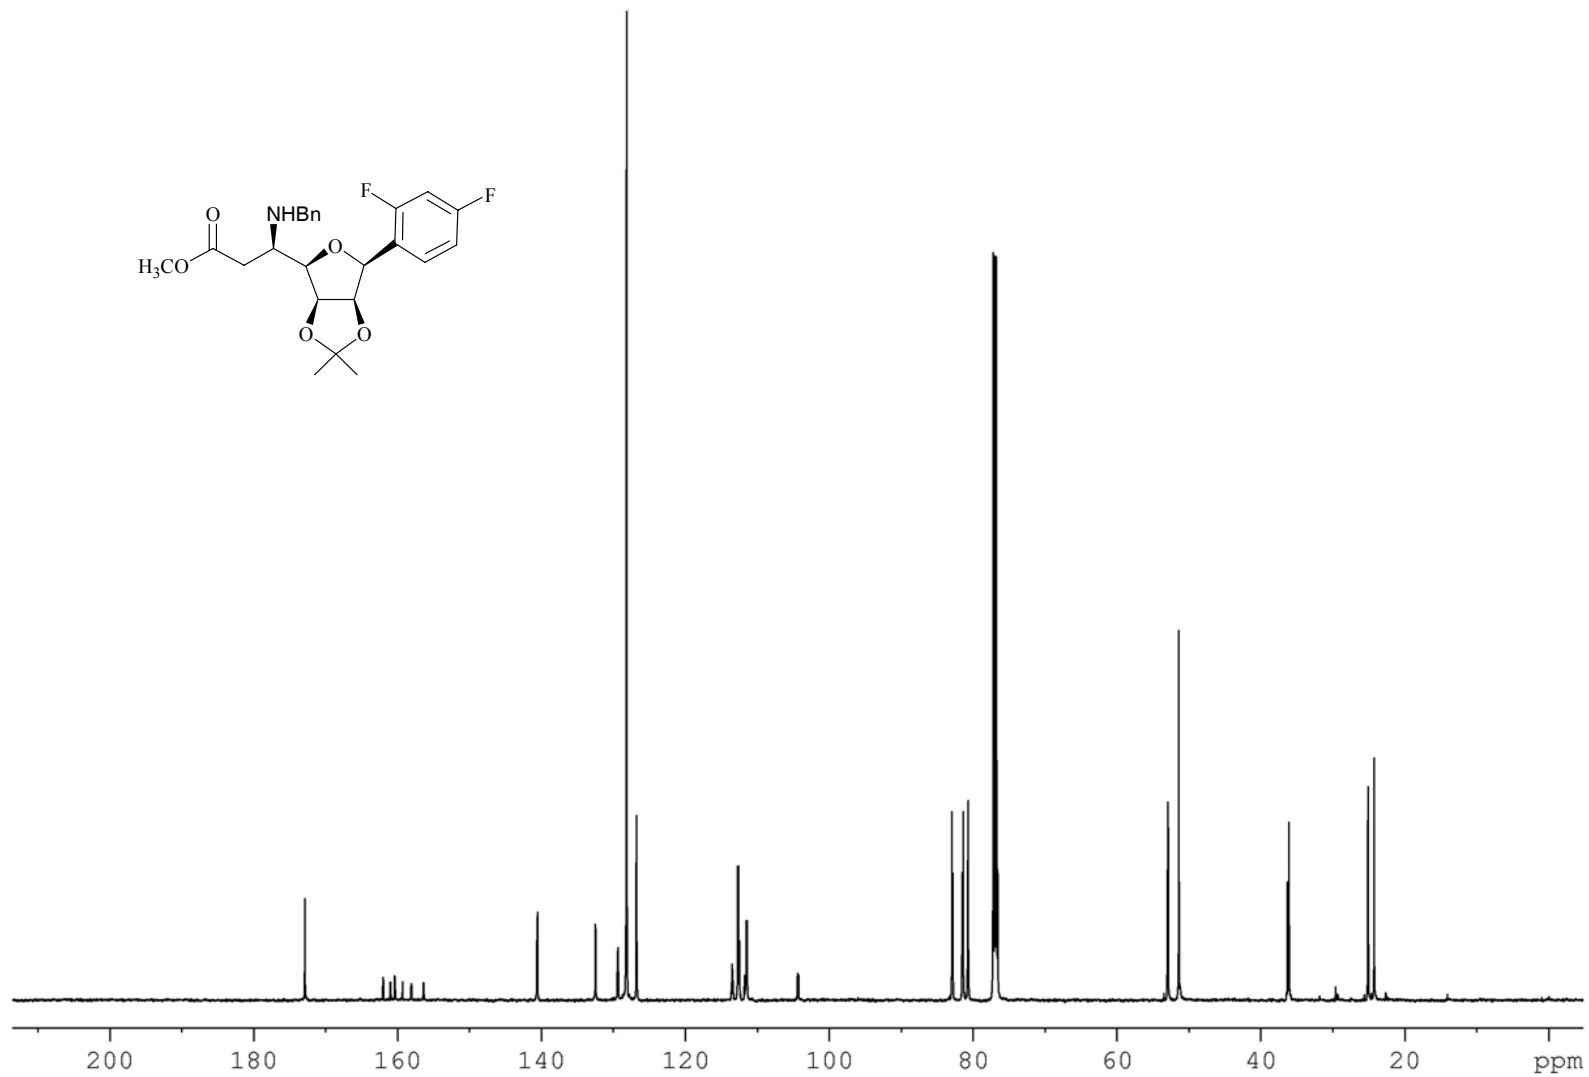

**Supporting Fig 76: <sup>13</sup>C NMR Spectrum of 52 (CDCl<sub>3</sub>, 298 K, 150 MHz)**

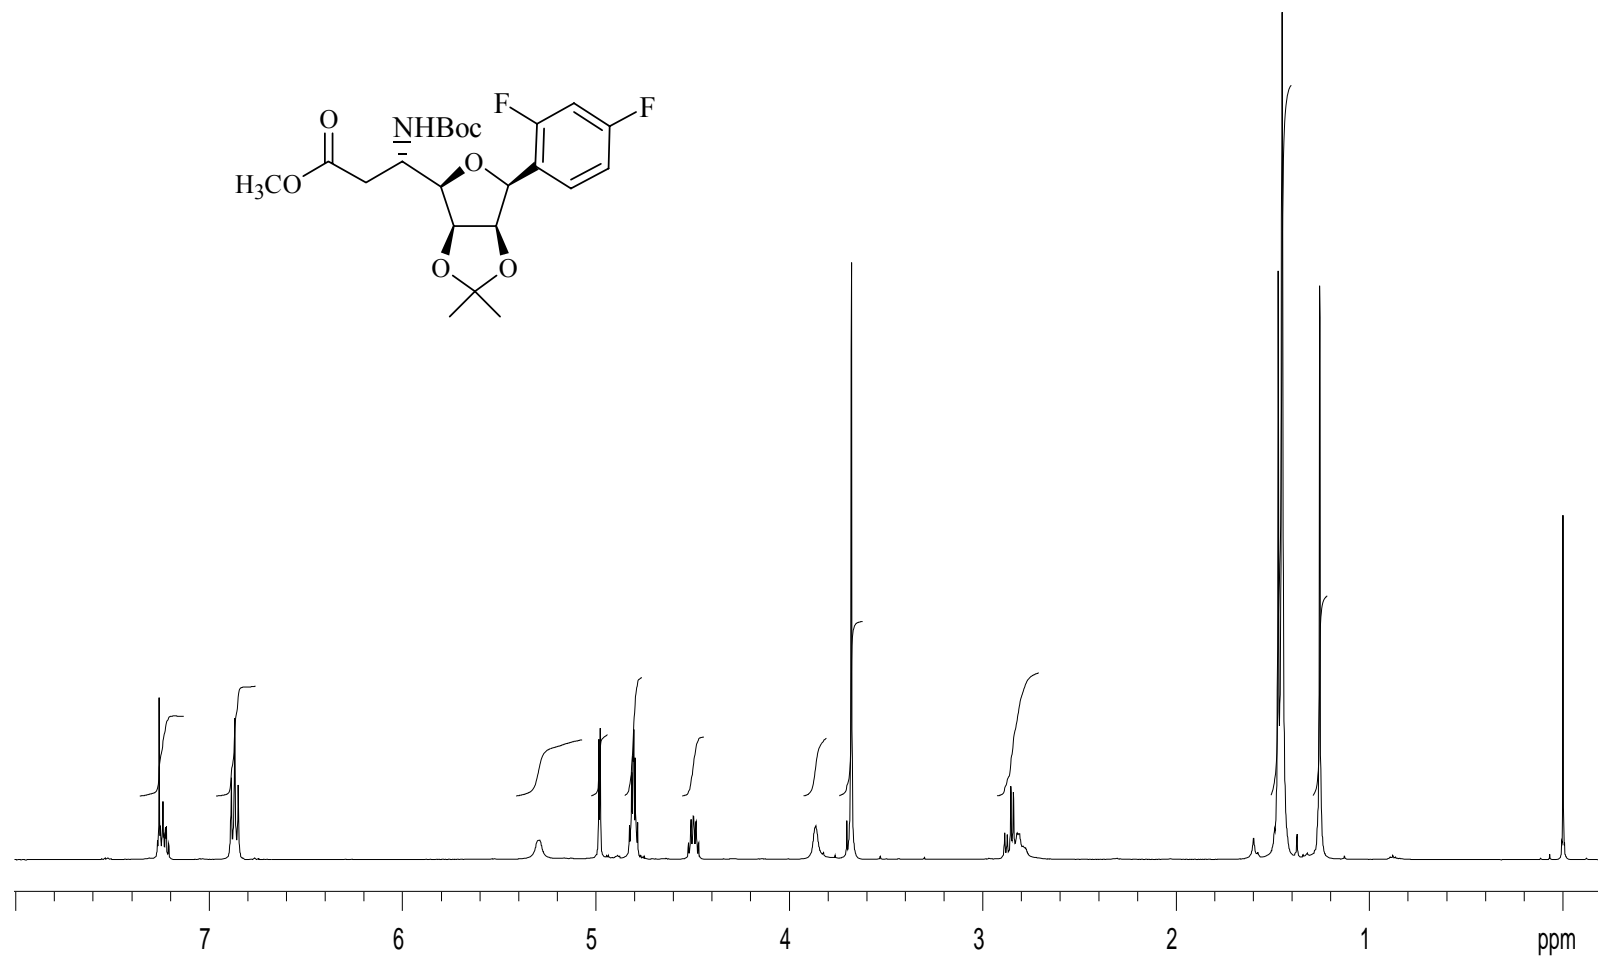

**Supporting Fig 77: <sup>1</sup>H NMR Spectrum of 3 (CDCl<sub>3</sub>, 303 K, 500 MHz)**

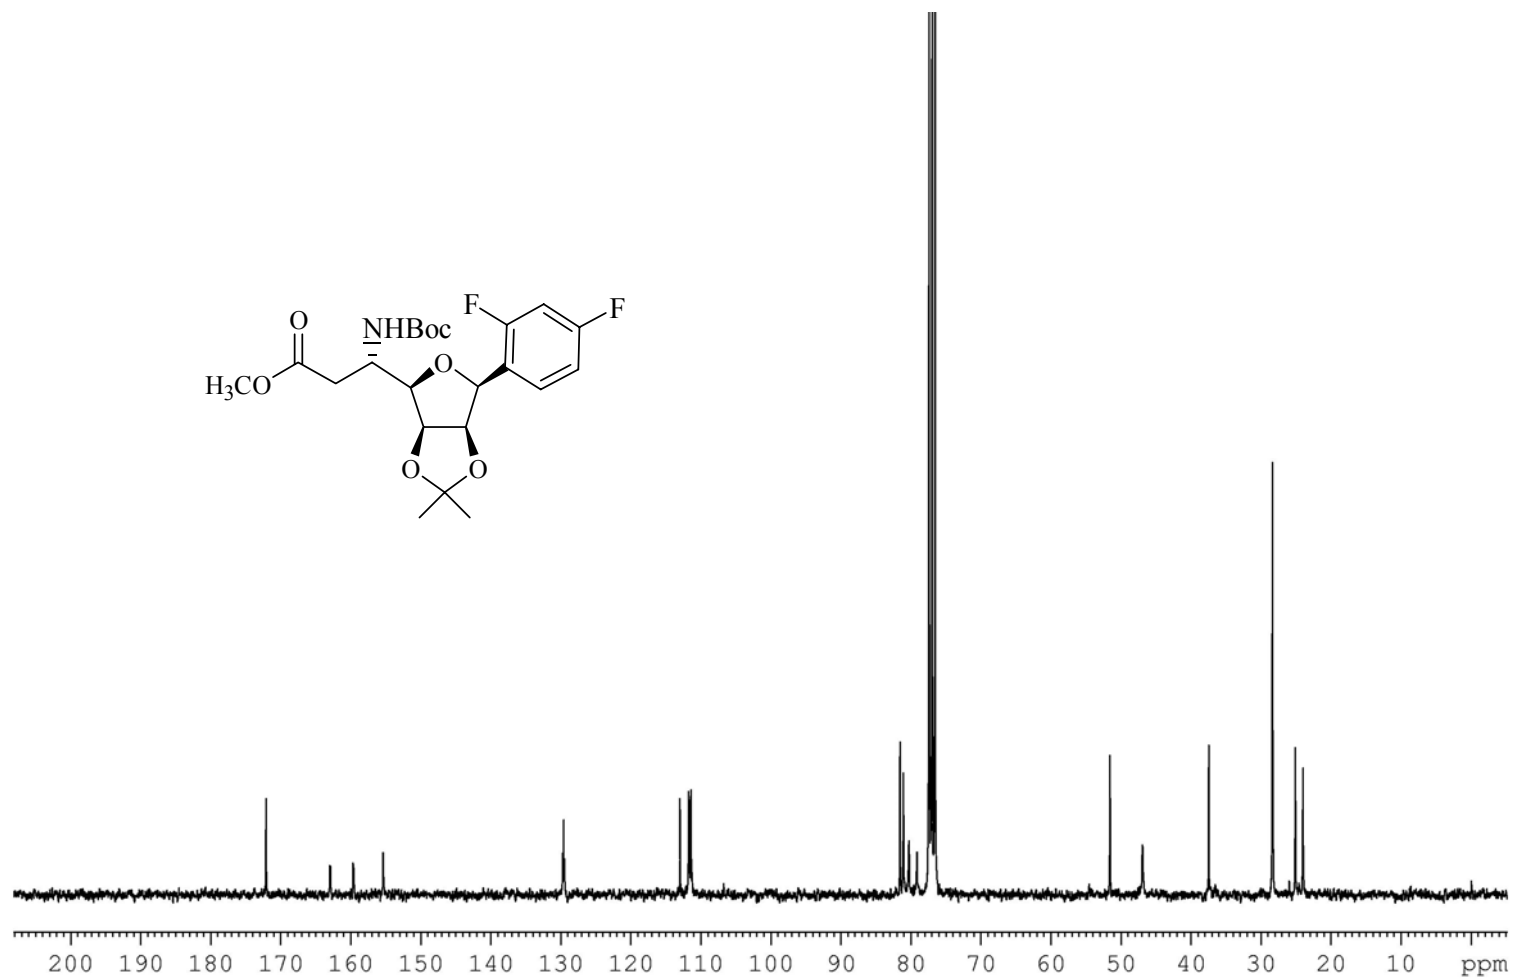

**Supporting Fig 78:  $^{13}\text{C}$  NMR Spectrum of 3 ( $\text{CDCl}_3$ , 294 K, 75 MHz)**

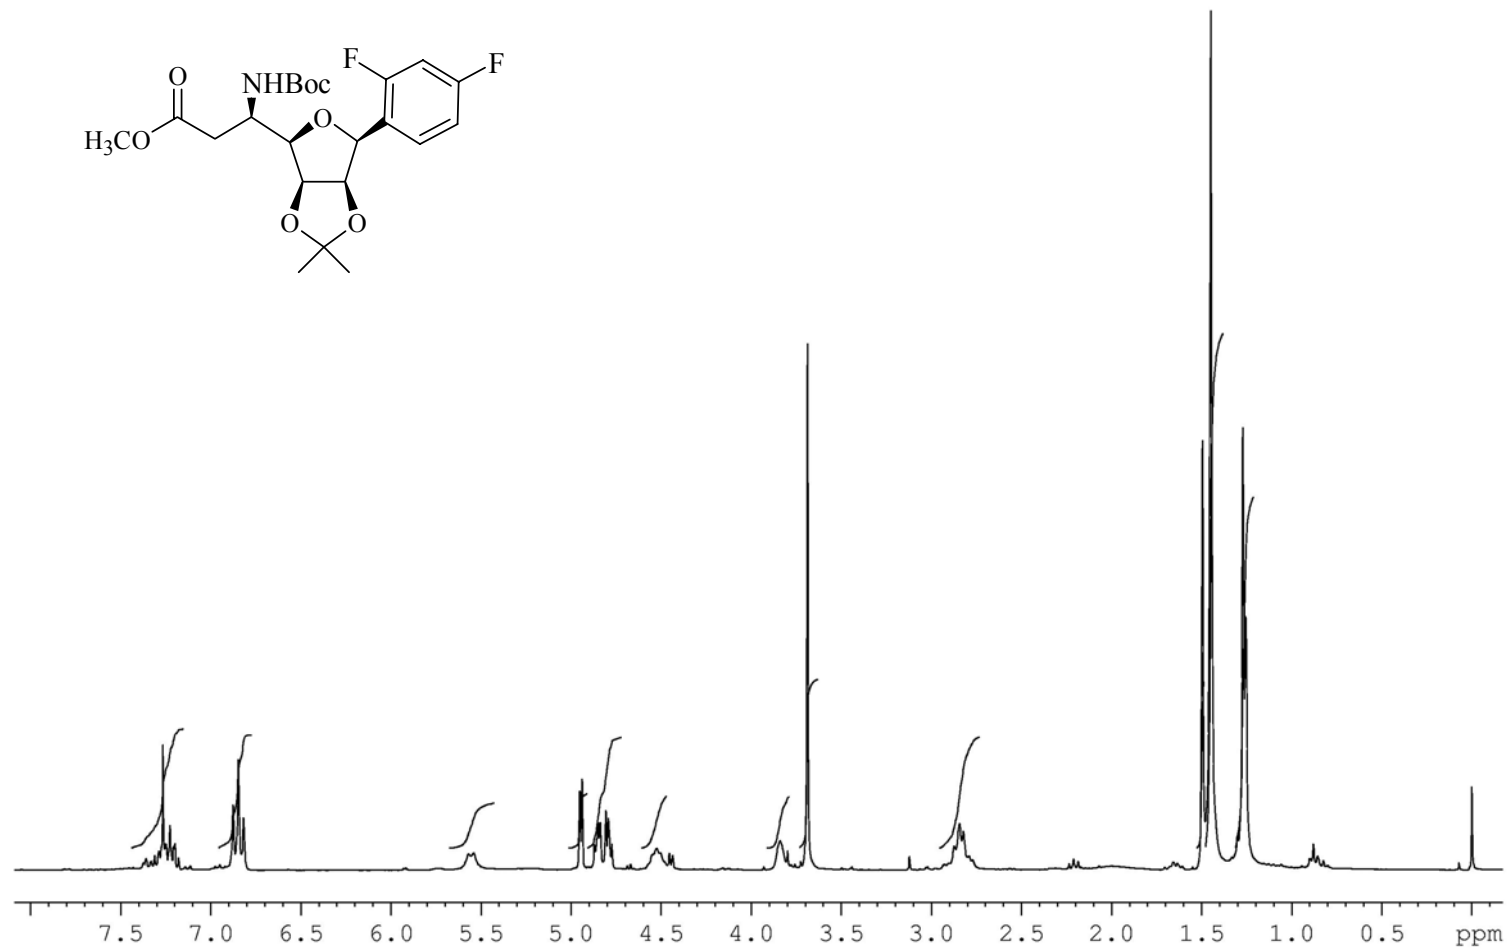

**Supporting Fig 79:  $^1\text{H}$  NMR Spectrum of 4 ( $\text{CDCl}_3$ , 294 K, 300 MHz)**

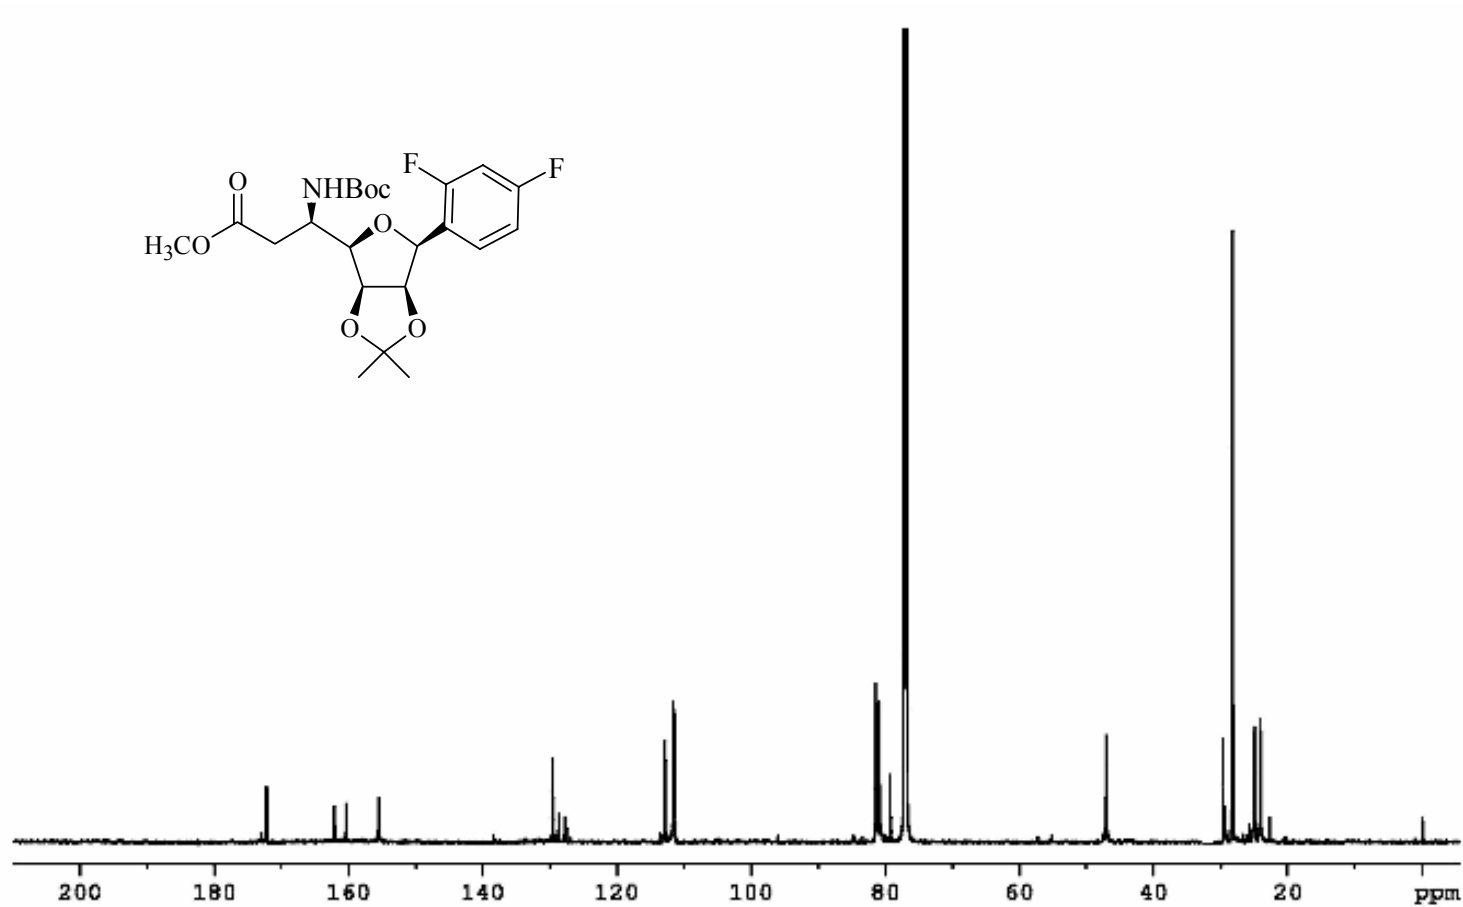

Supporting Fig 80: <sup>13</sup>C NMR Spectrum of 4 (CDCl<sub>3</sub>, 294 K, 75 MHz)

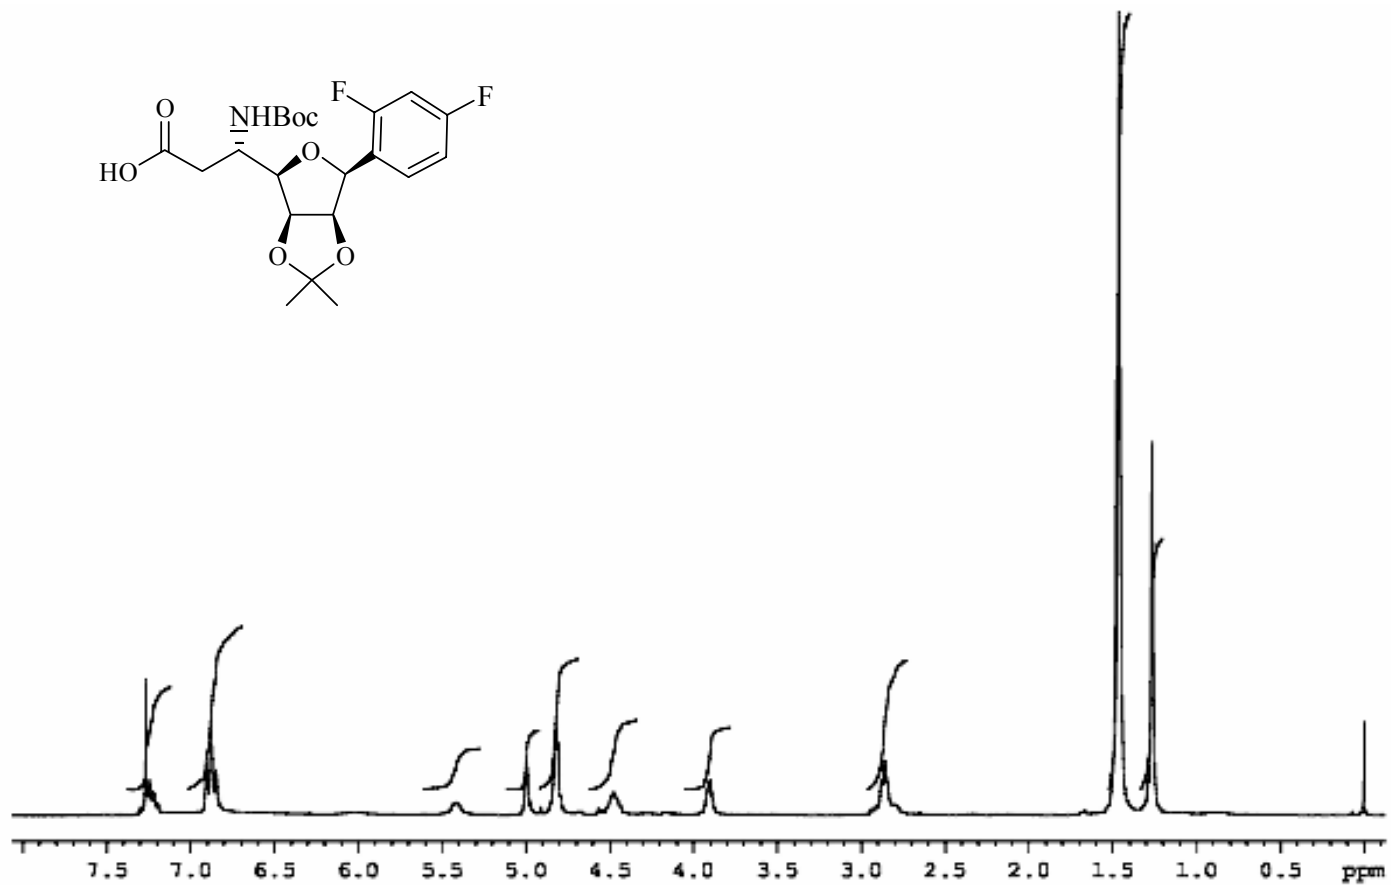

**Supporting Fig 81: <sup>1</sup>H NMR Spectrum of 55 (CDCl<sub>3</sub>, 294 K, 300 MHz)**



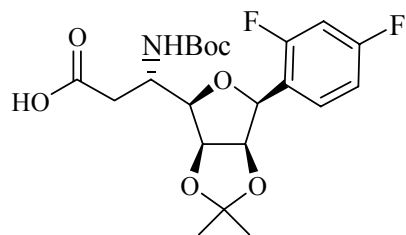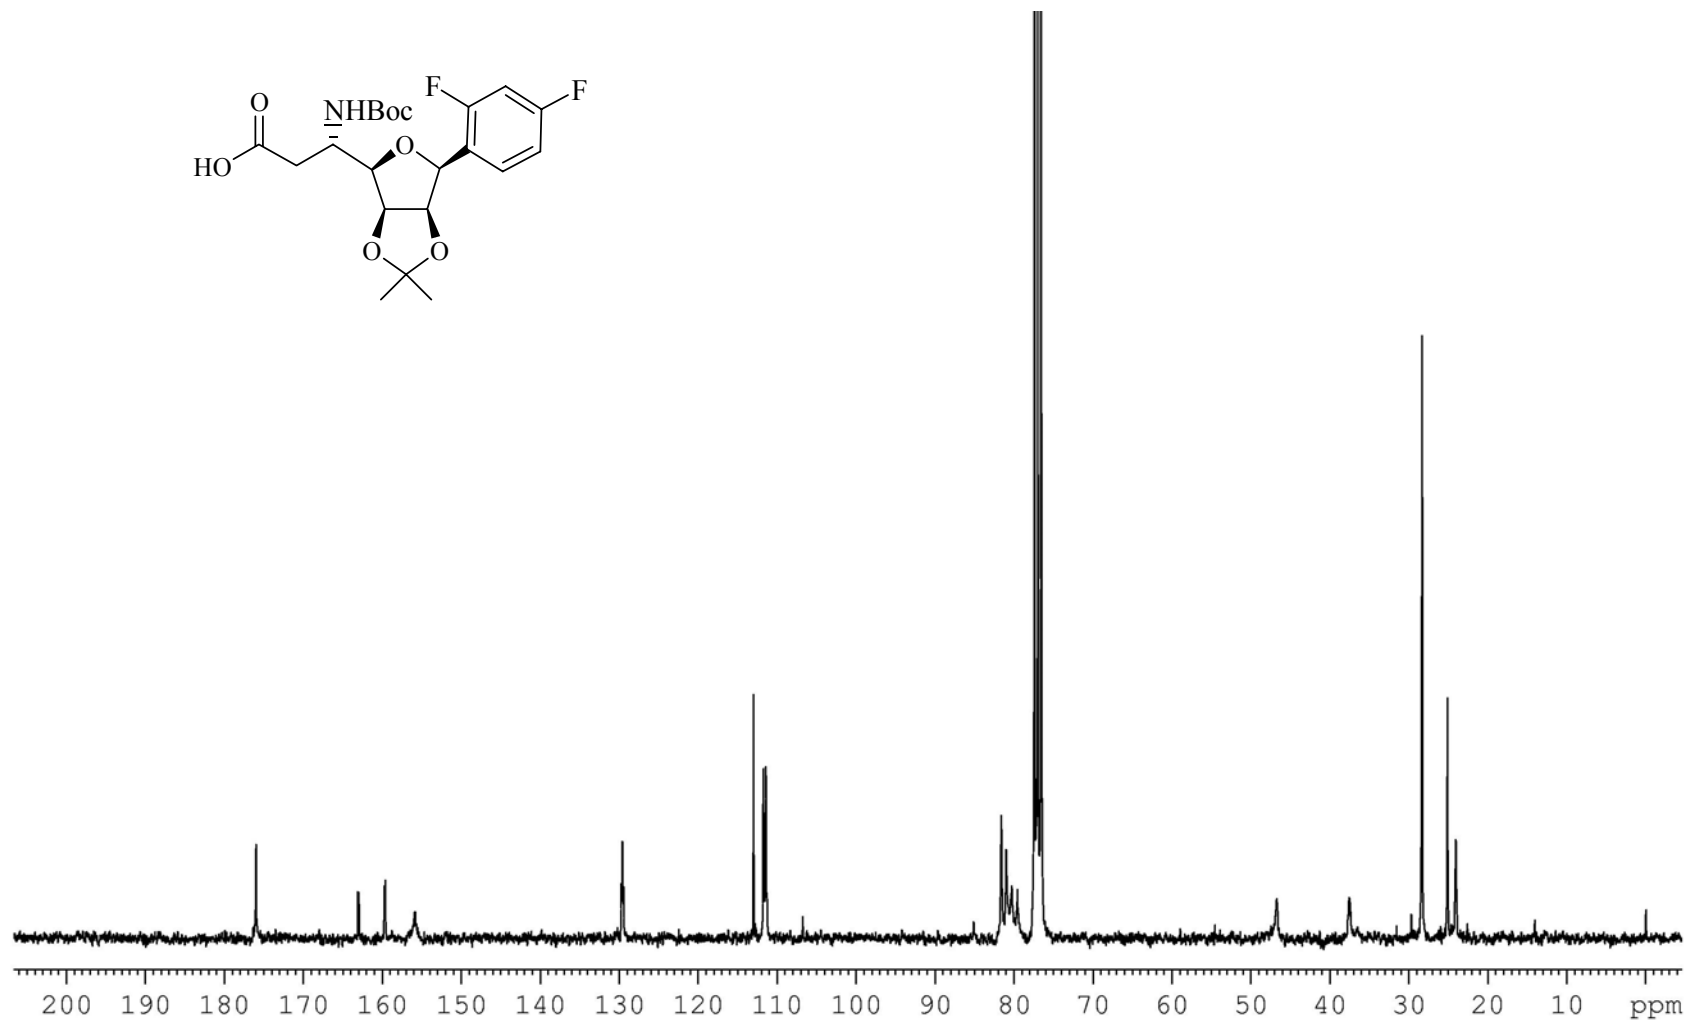

Supporting Fig 82:  $^{13}\text{C}$  NMR Spectrum of 55 ( $\text{CDCl}_3$ , 294 K, 75 MHz)

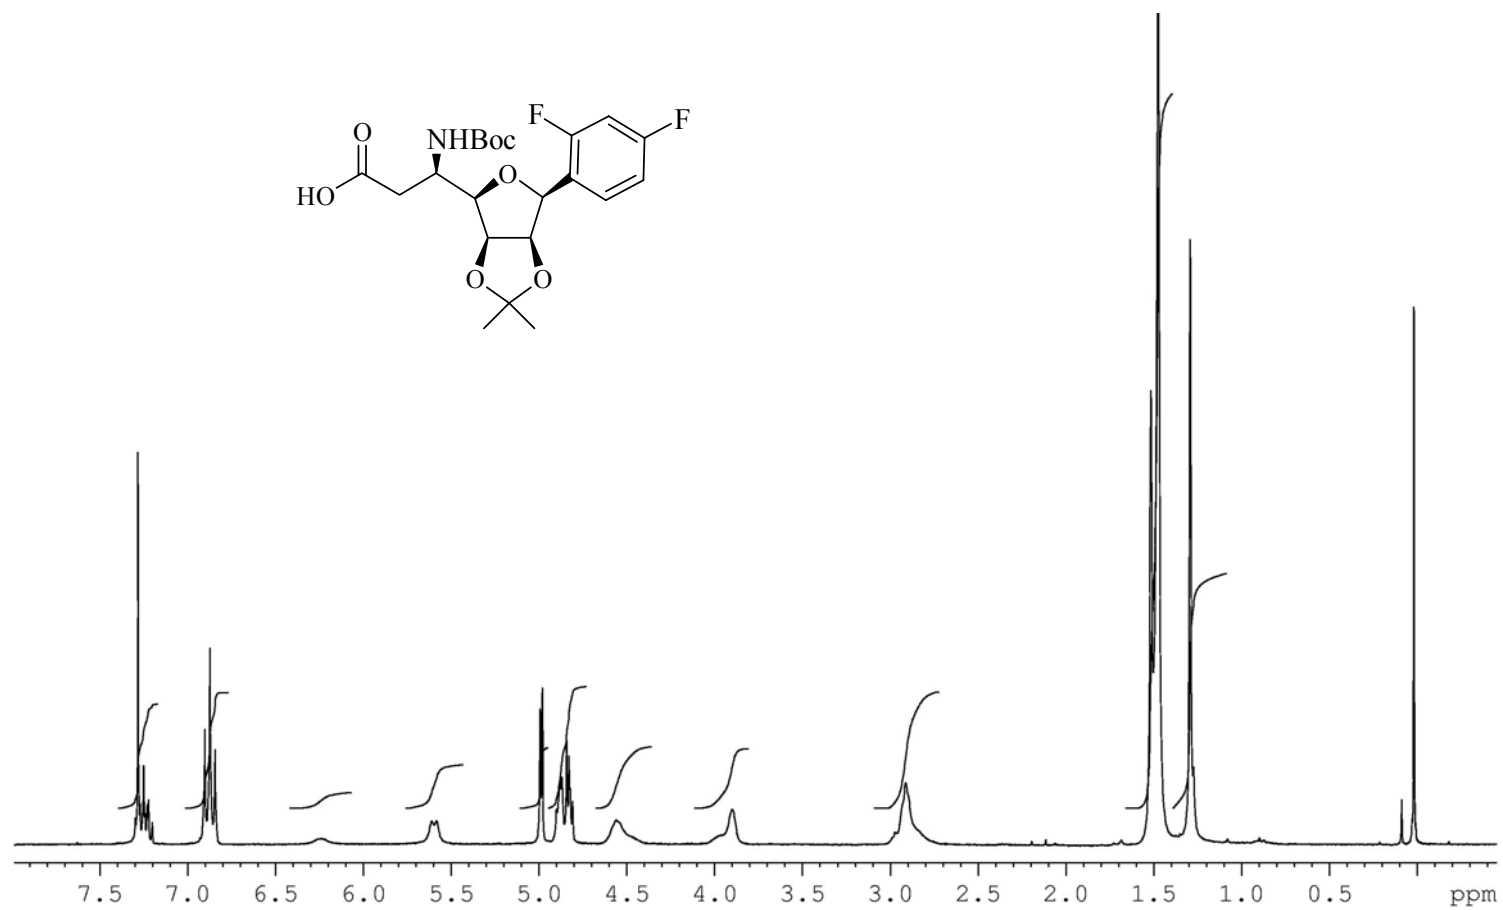

**Supporting Fig 83: <sup>1</sup>H NMR Spectrum of 56 (CDCl<sub>3</sub>, 294 K, 300 MHz)**

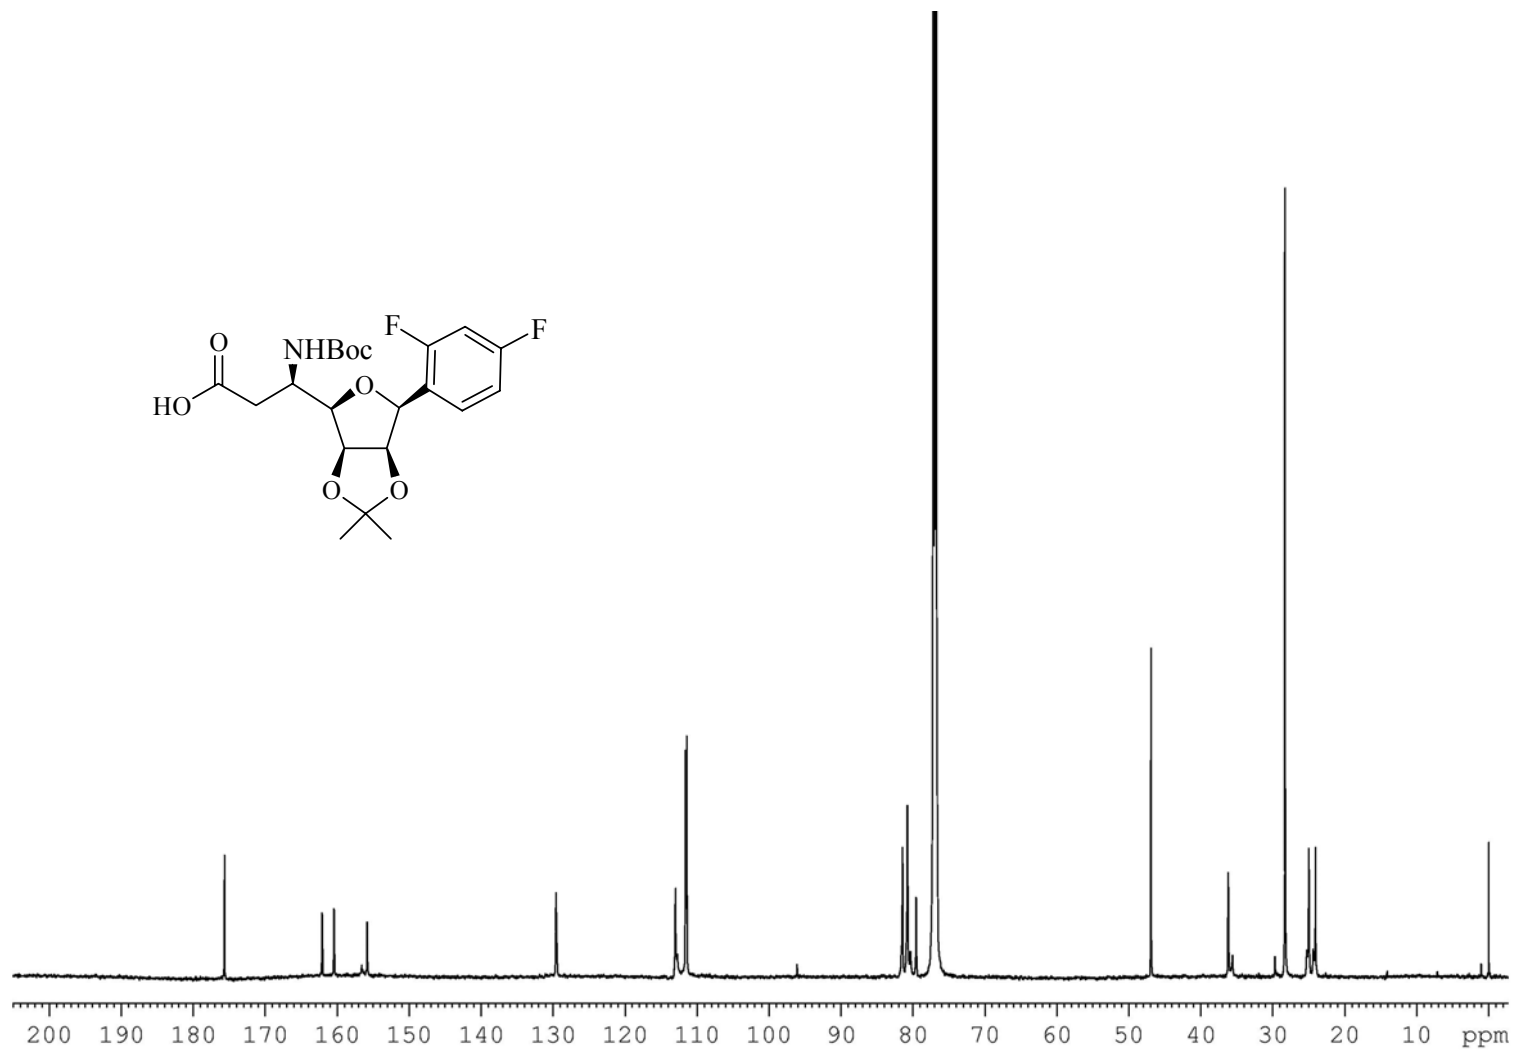

**Supporting Fig 84: <sup>13</sup>C NMR Spectrum of 56 (CDCl<sub>3</sub>, 294 K, 75 MHz)**

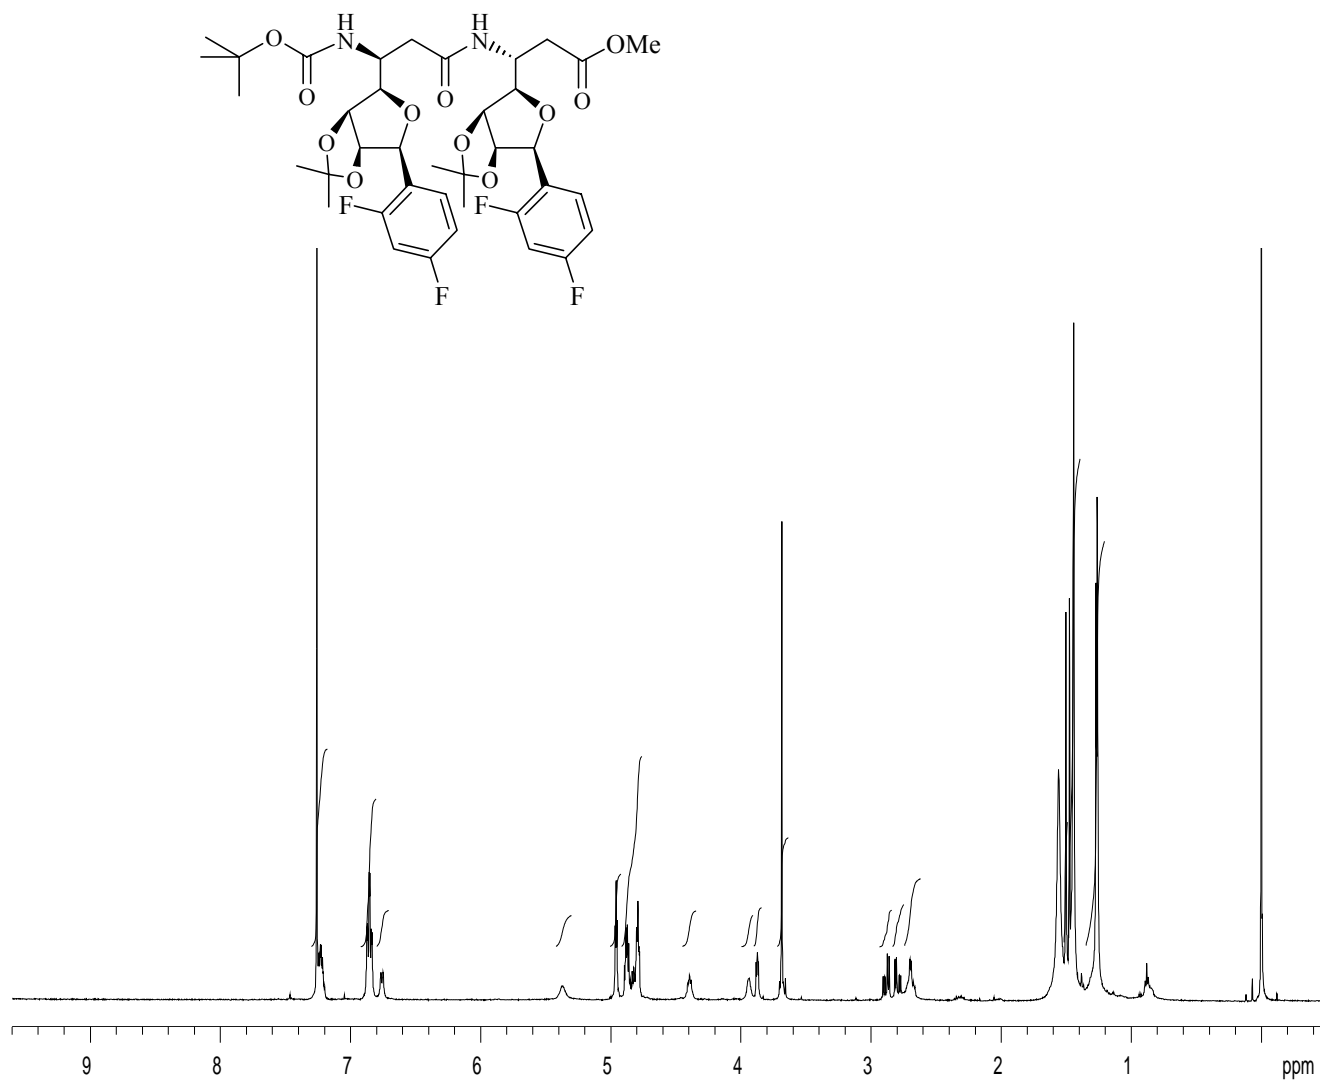

Supporting Fig 85: <sup>1</sup>H NMR Spectrum of 59 (CDCl<sub>3</sub>, 303 K, 500 MHz)

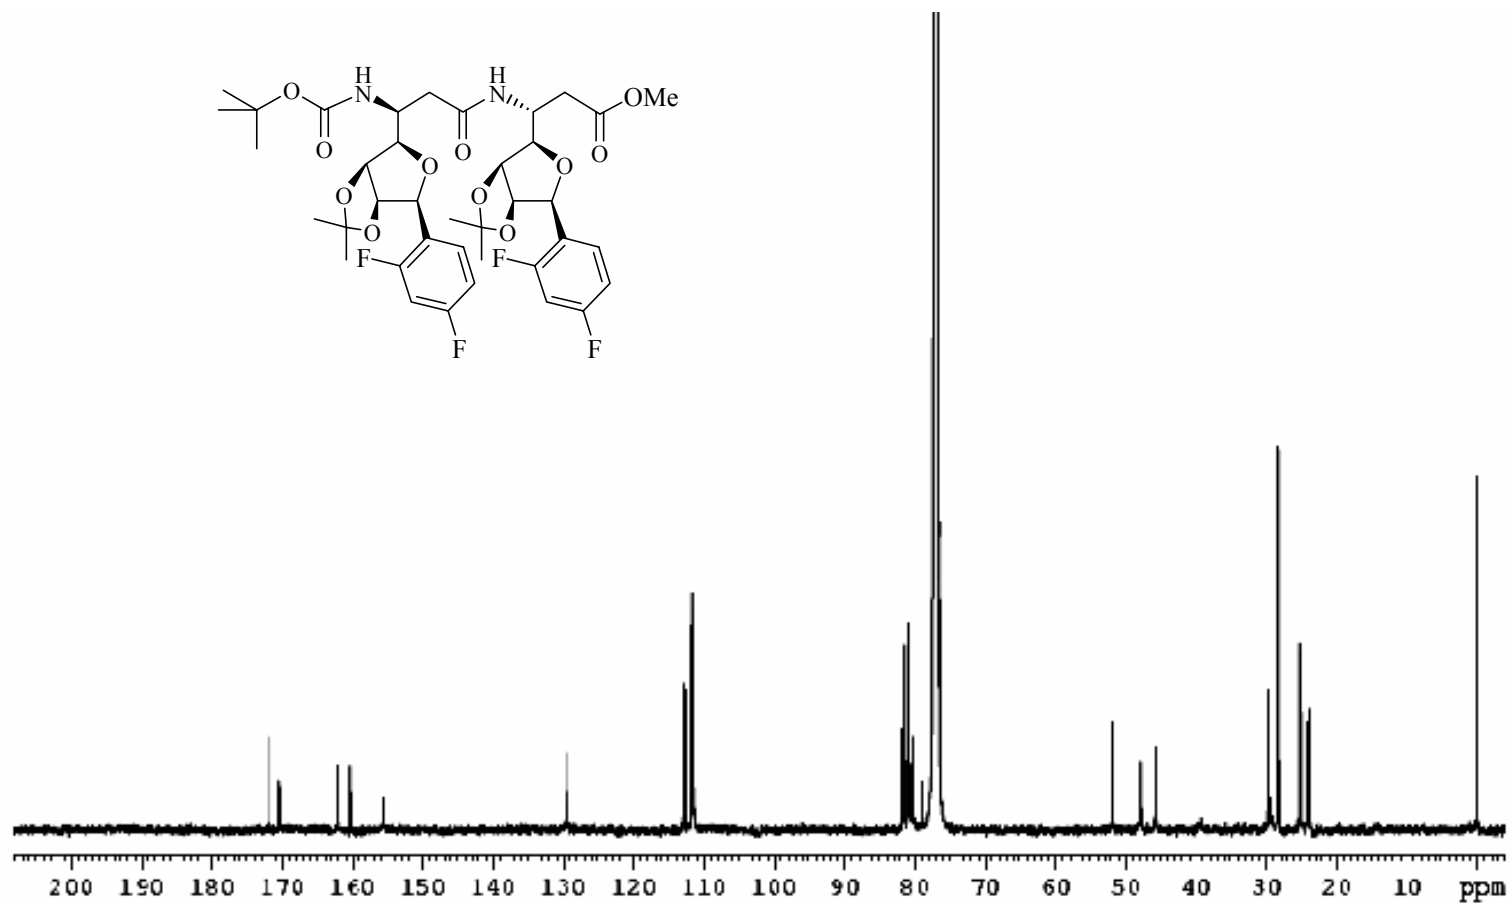

Supporting Fig 86: <sup>13</sup>C NMR Spectrum of 59 (CDCl<sub>3</sub>, 298 K, 150 MHz)

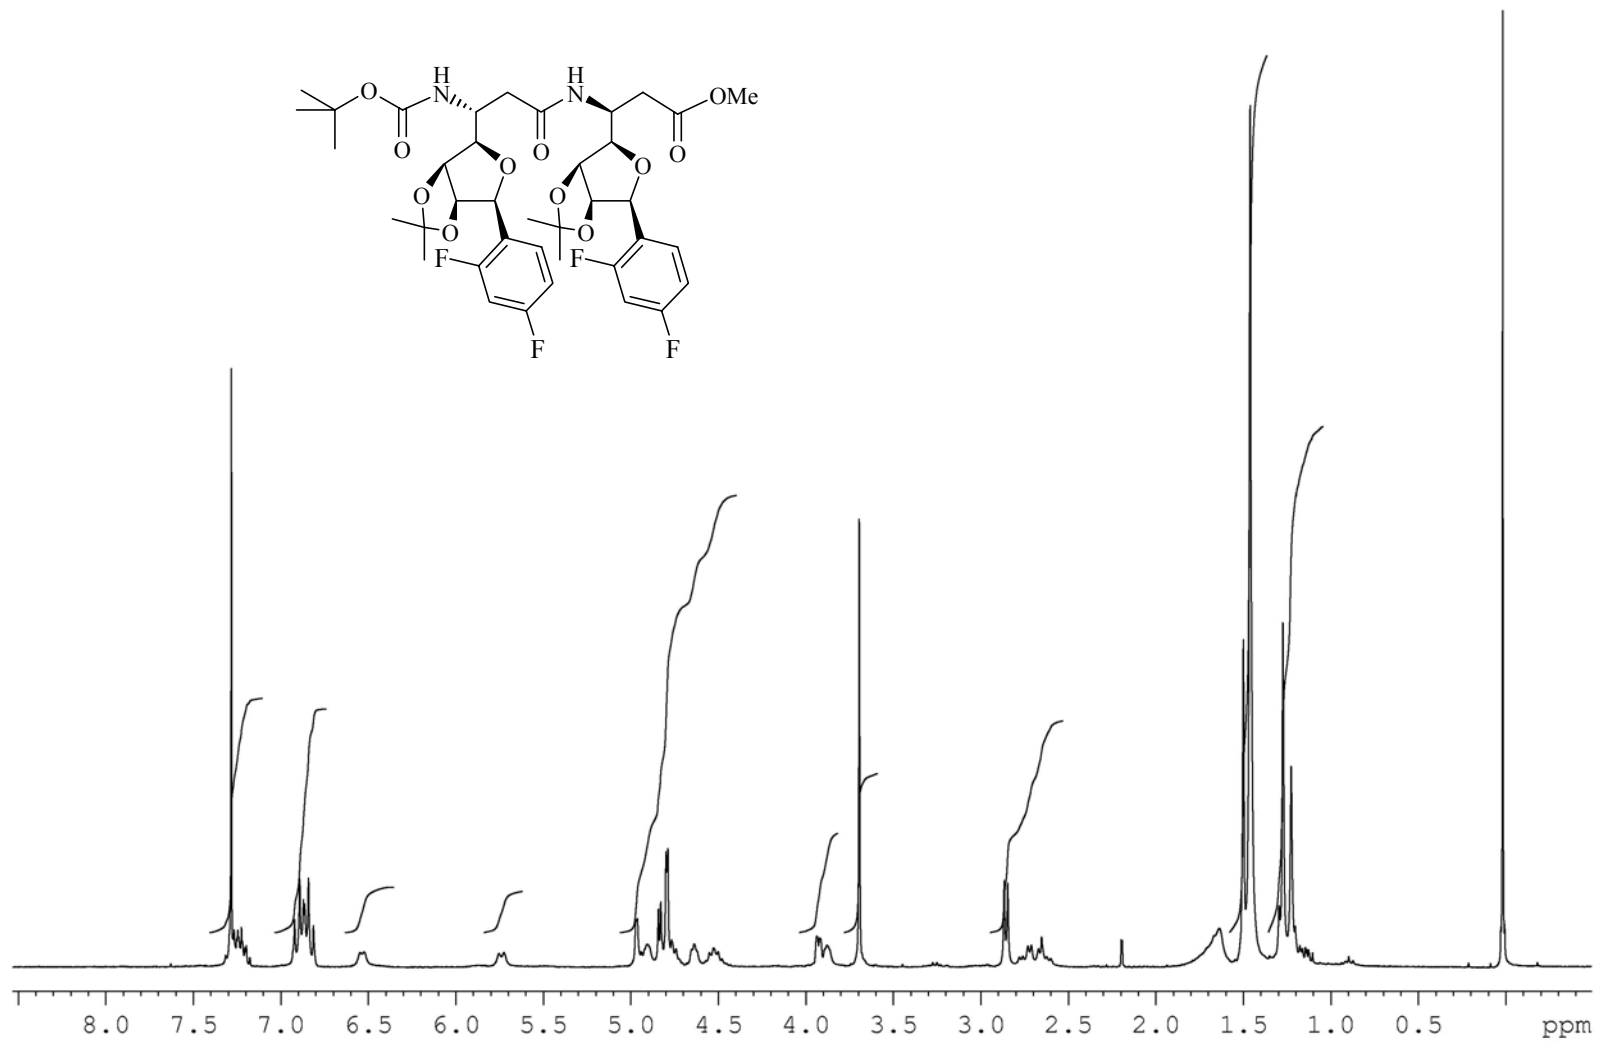

**Supporting Fig 87: <sup>1</sup>H NMR Spectrum of 63 (CDCl<sub>3</sub>, 294 K, 300 MHz)**

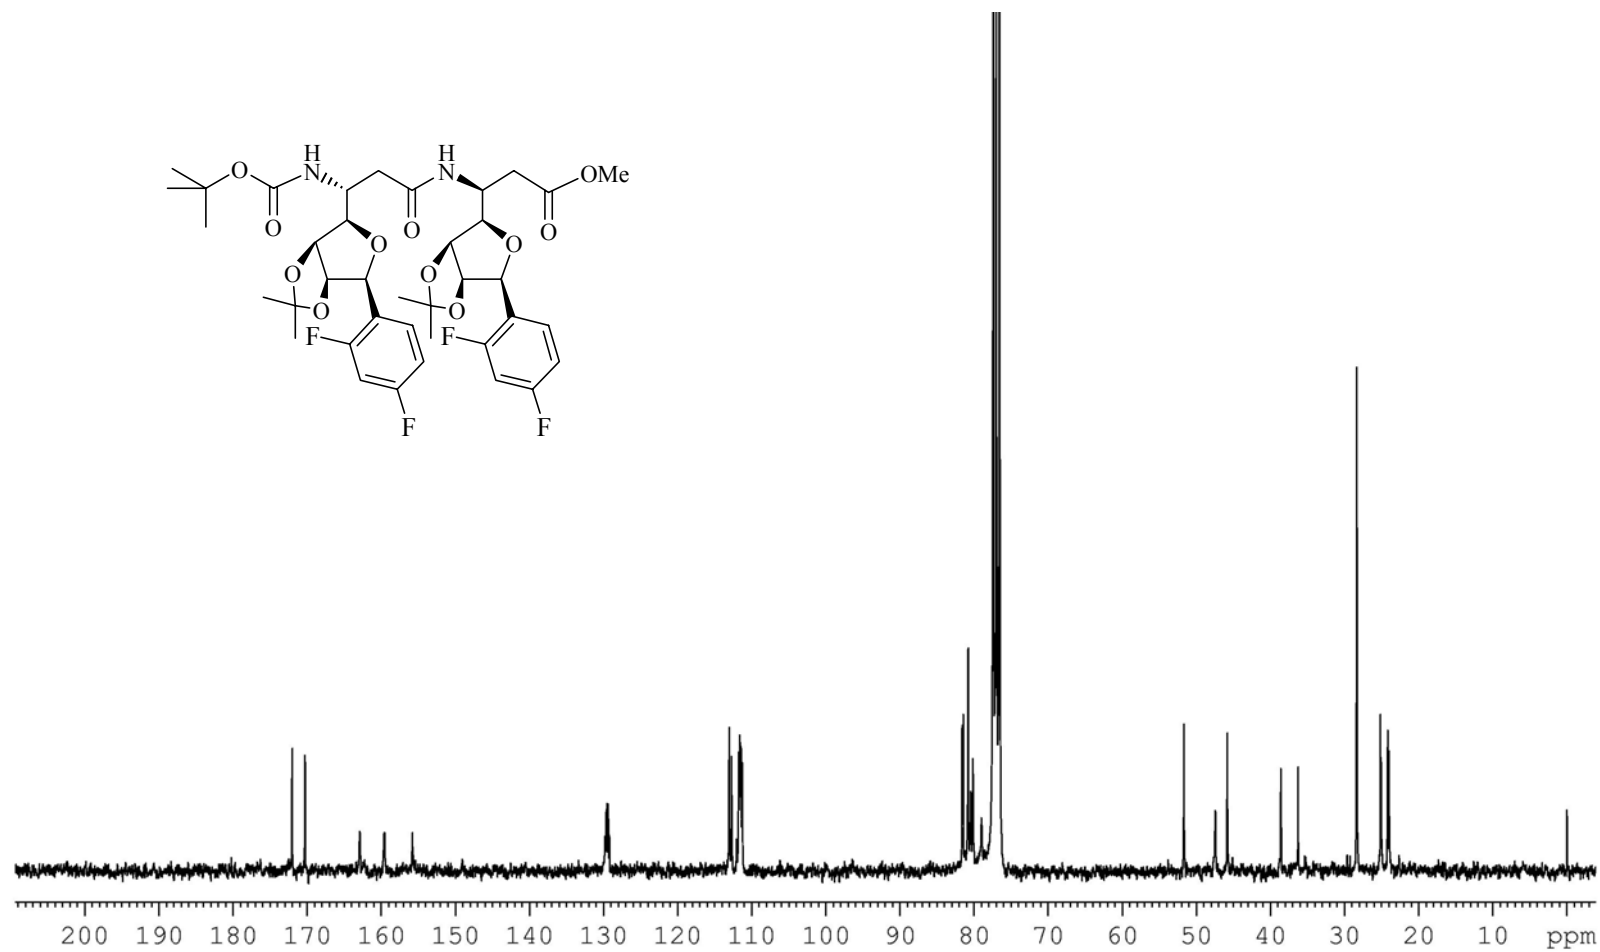

**Supporting Fig 88: <sup>13</sup>C NMR Spectrum of 63 (CDCl<sub>3</sub>, 298 K, 150 MHz)**

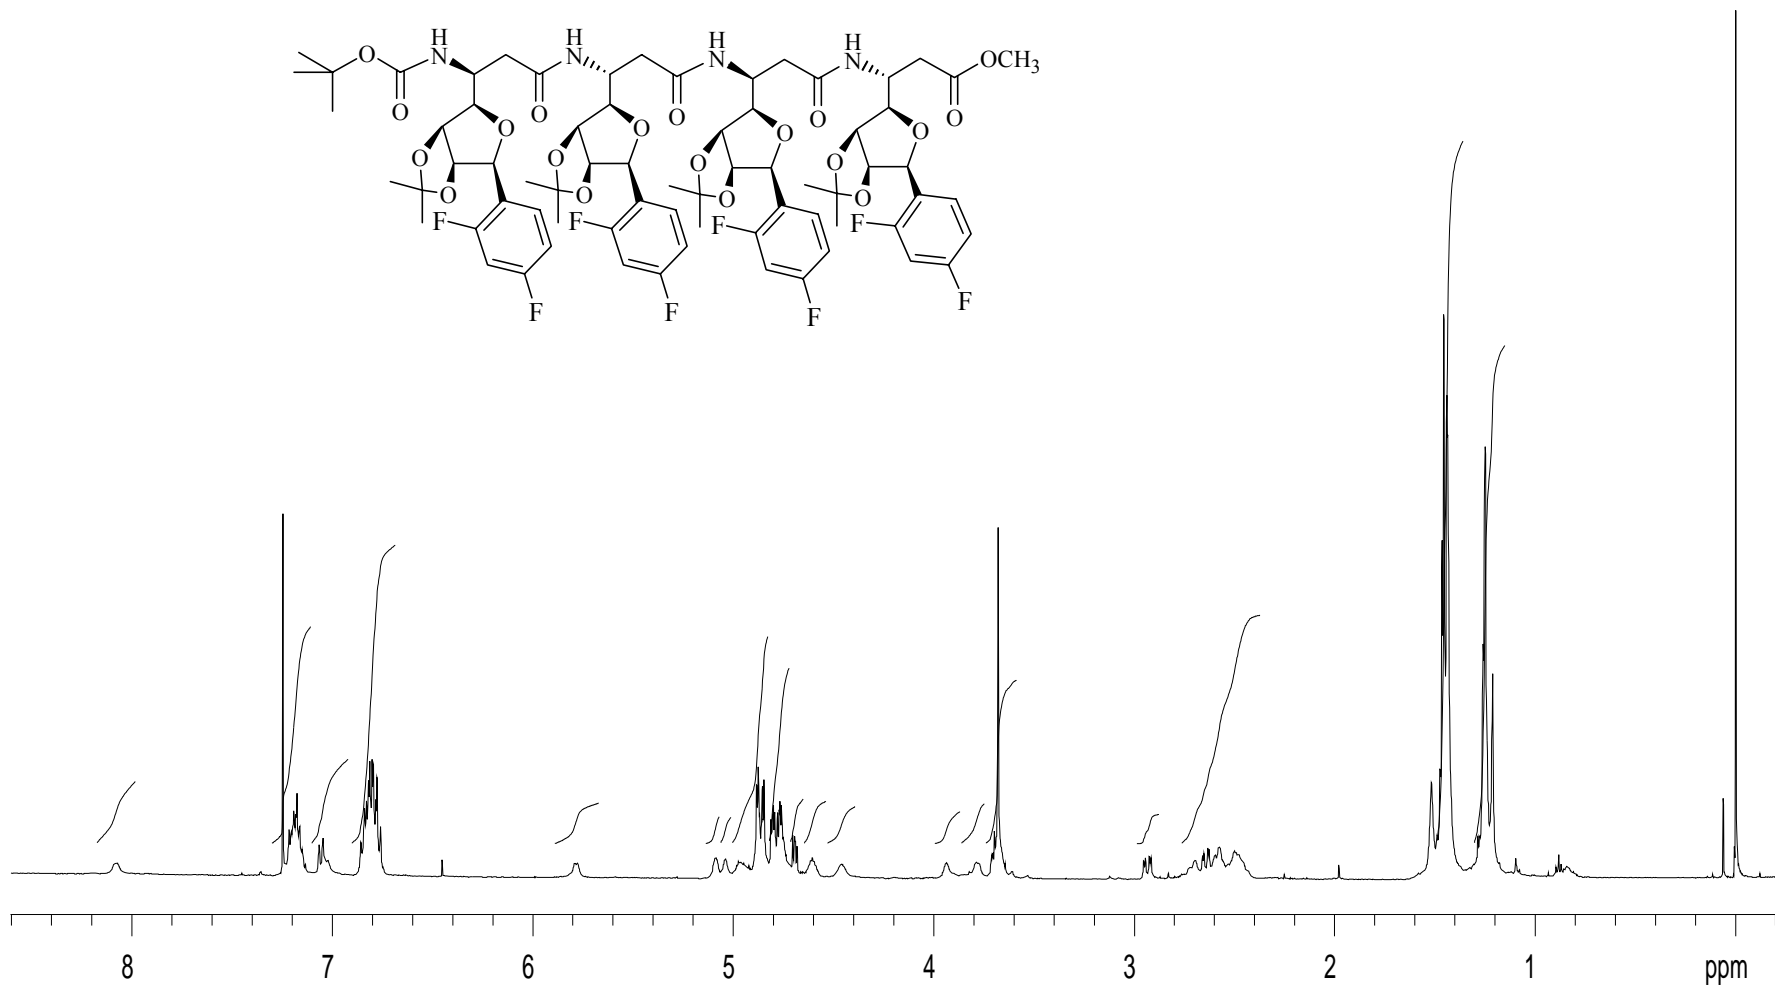

**Supporting Fig 89: <sup>1</sup>H NMR Spectrum of 13 (CDCl<sub>3</sub>, 303 K, 500 MHz)**



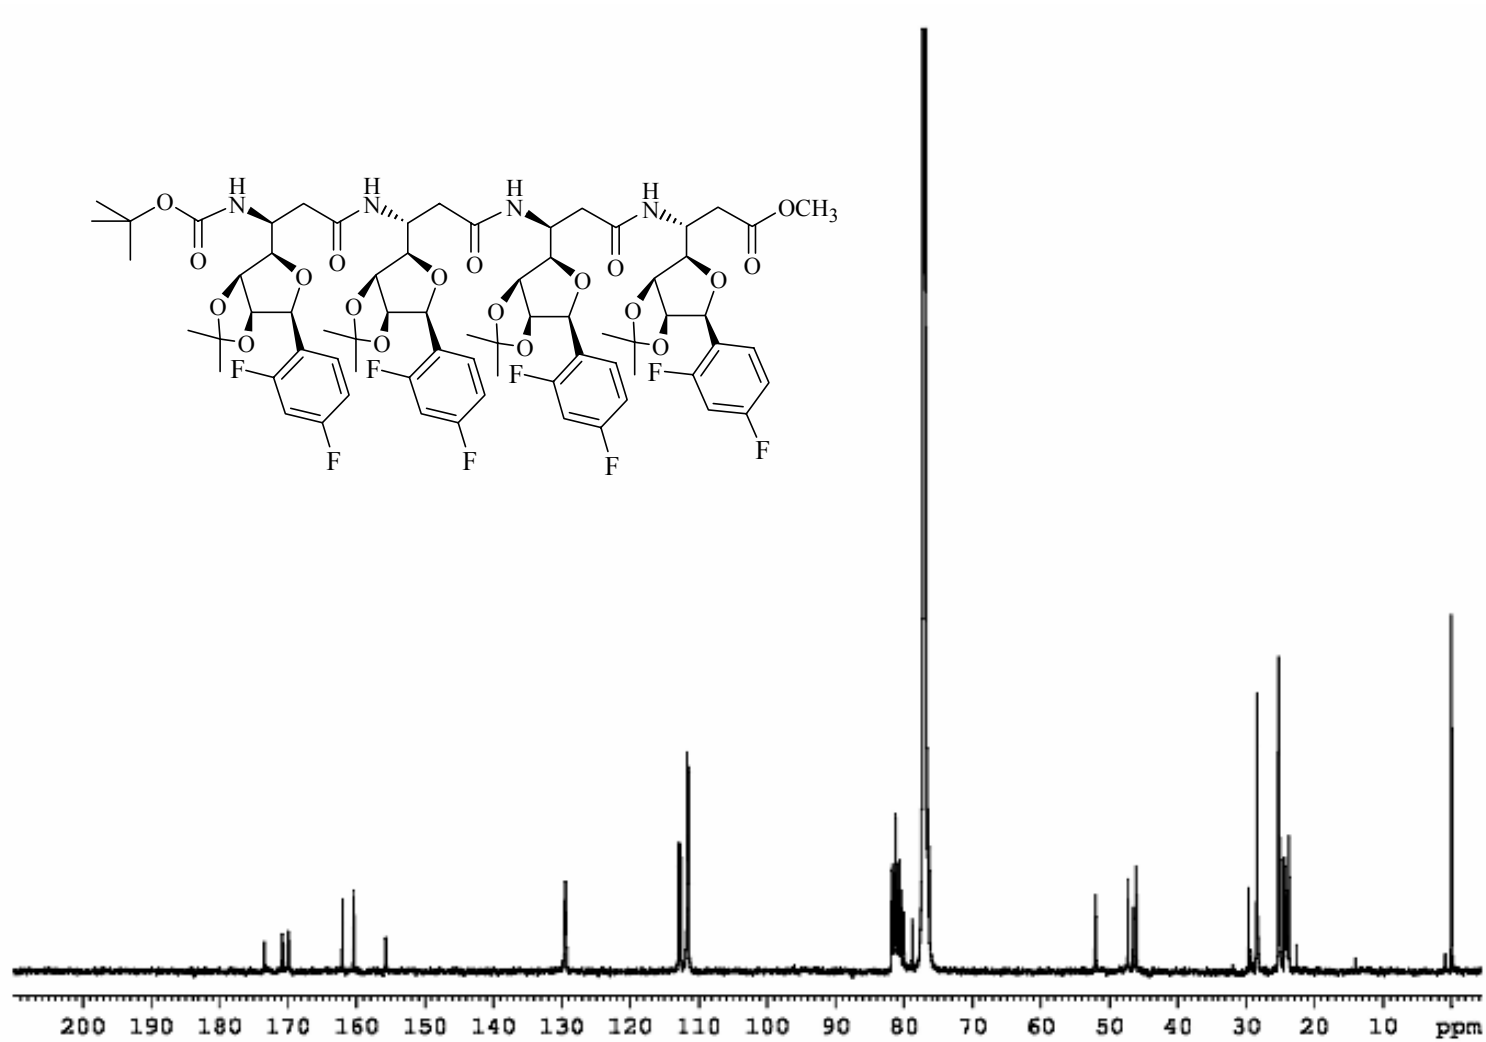

Supporting Fig 90:  $^{13}\text{C}$  NMR Spectrum of 13 ( $\text{CDCl}_3$ , 298 K, 150 MHz)

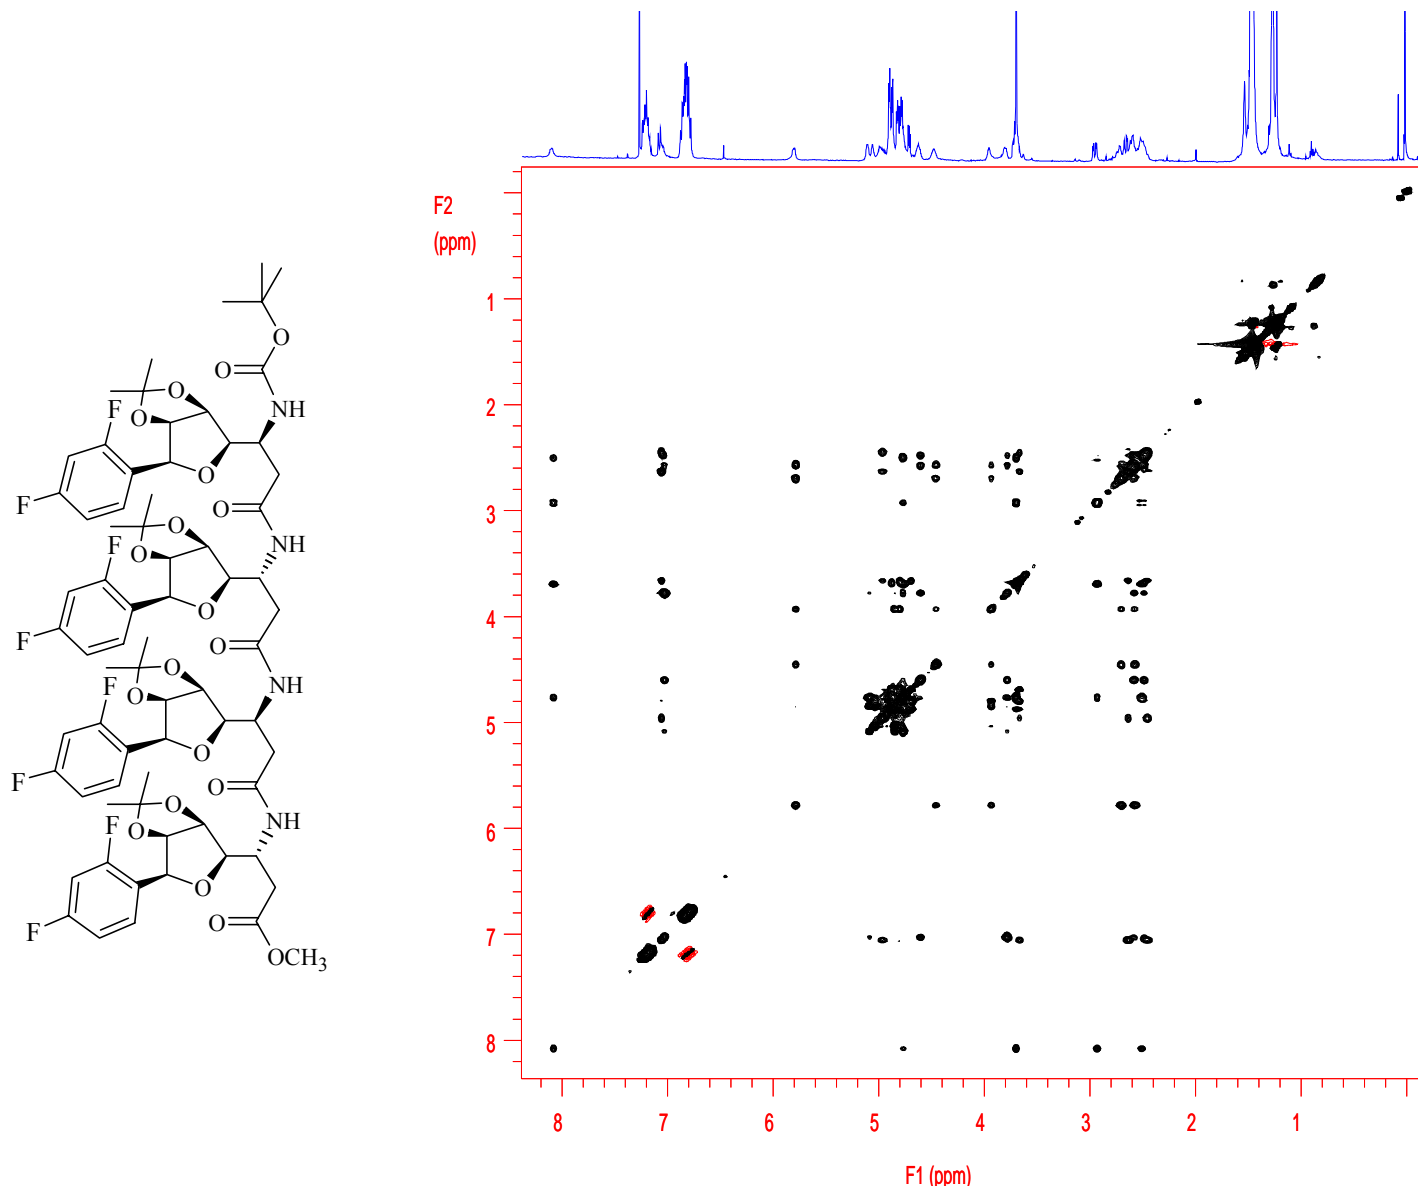

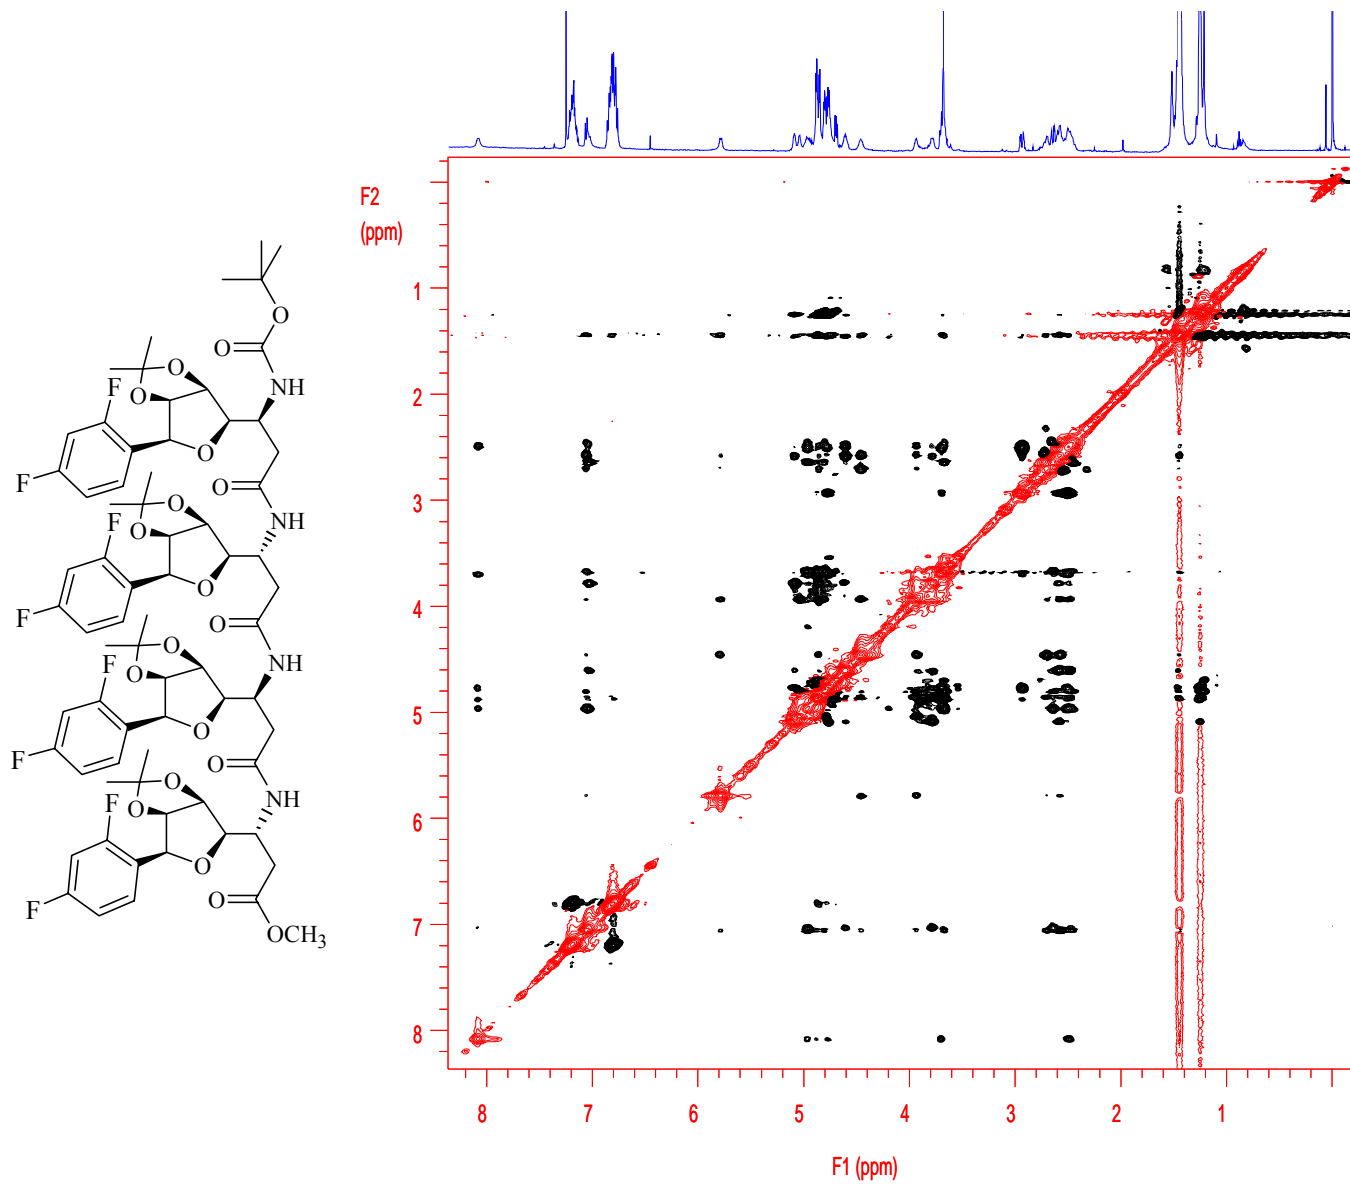

Supporting Fig 92: ROESY Spectrum of 13 (CDCl<sub>3</sub>, 303 K, 500 MHz)

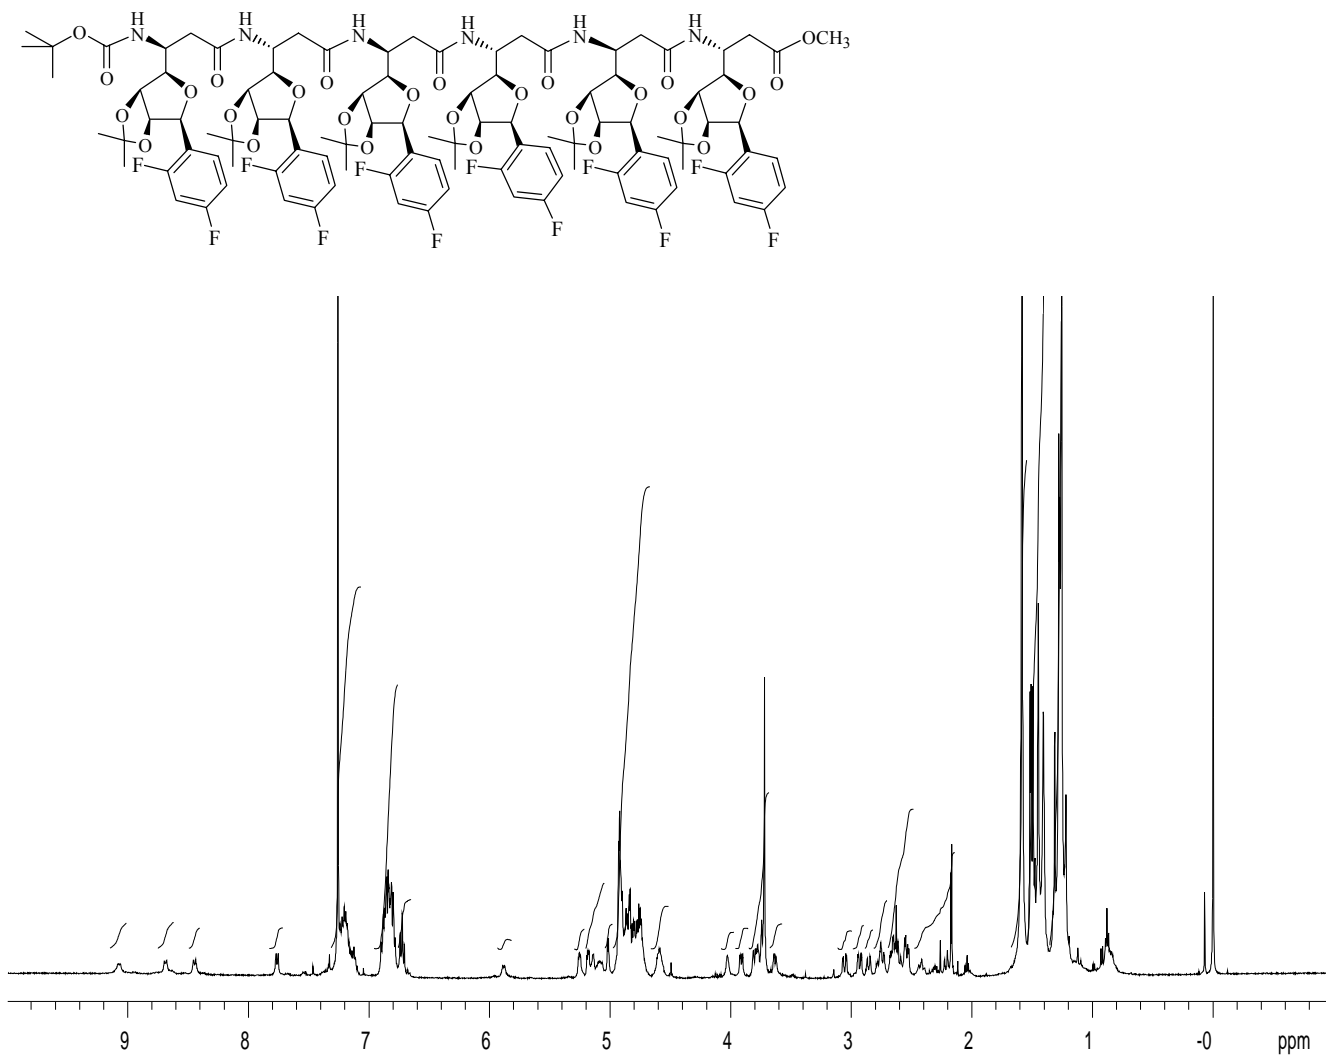

**Supporting Fig 93: <sup>1</sup>H NMR Spectrum of 14 (CDCl<sub>3</sub>, 303 K, 500 MHz)**

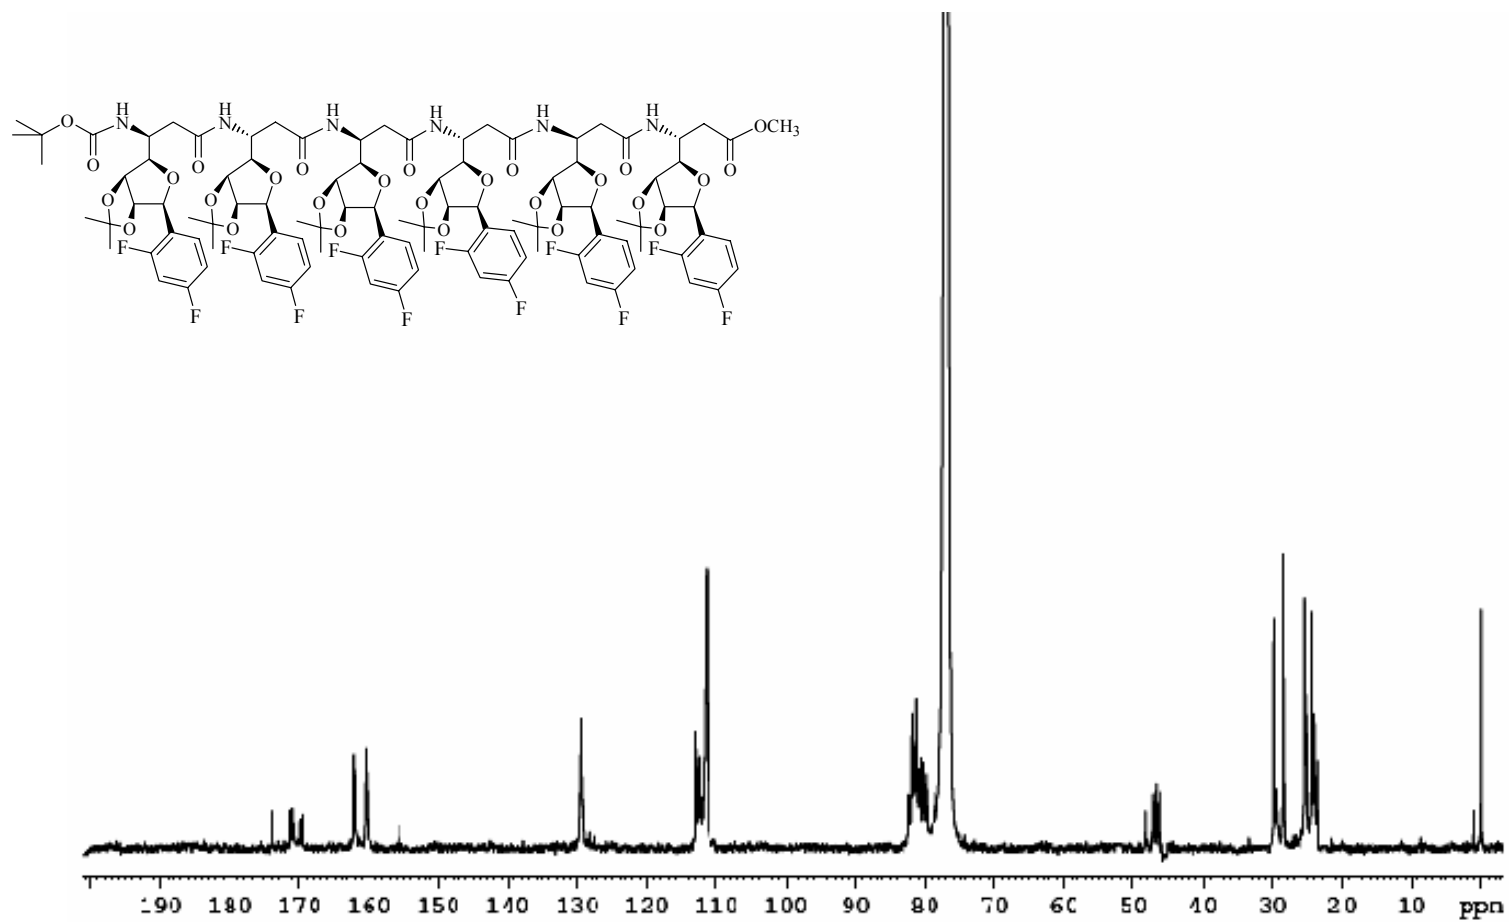

Supporting Fig 94: <sup>13</sup>C NMR Spectrum of 14 (CDCl<sub>3</sub>, 303 K, 150 MHz)

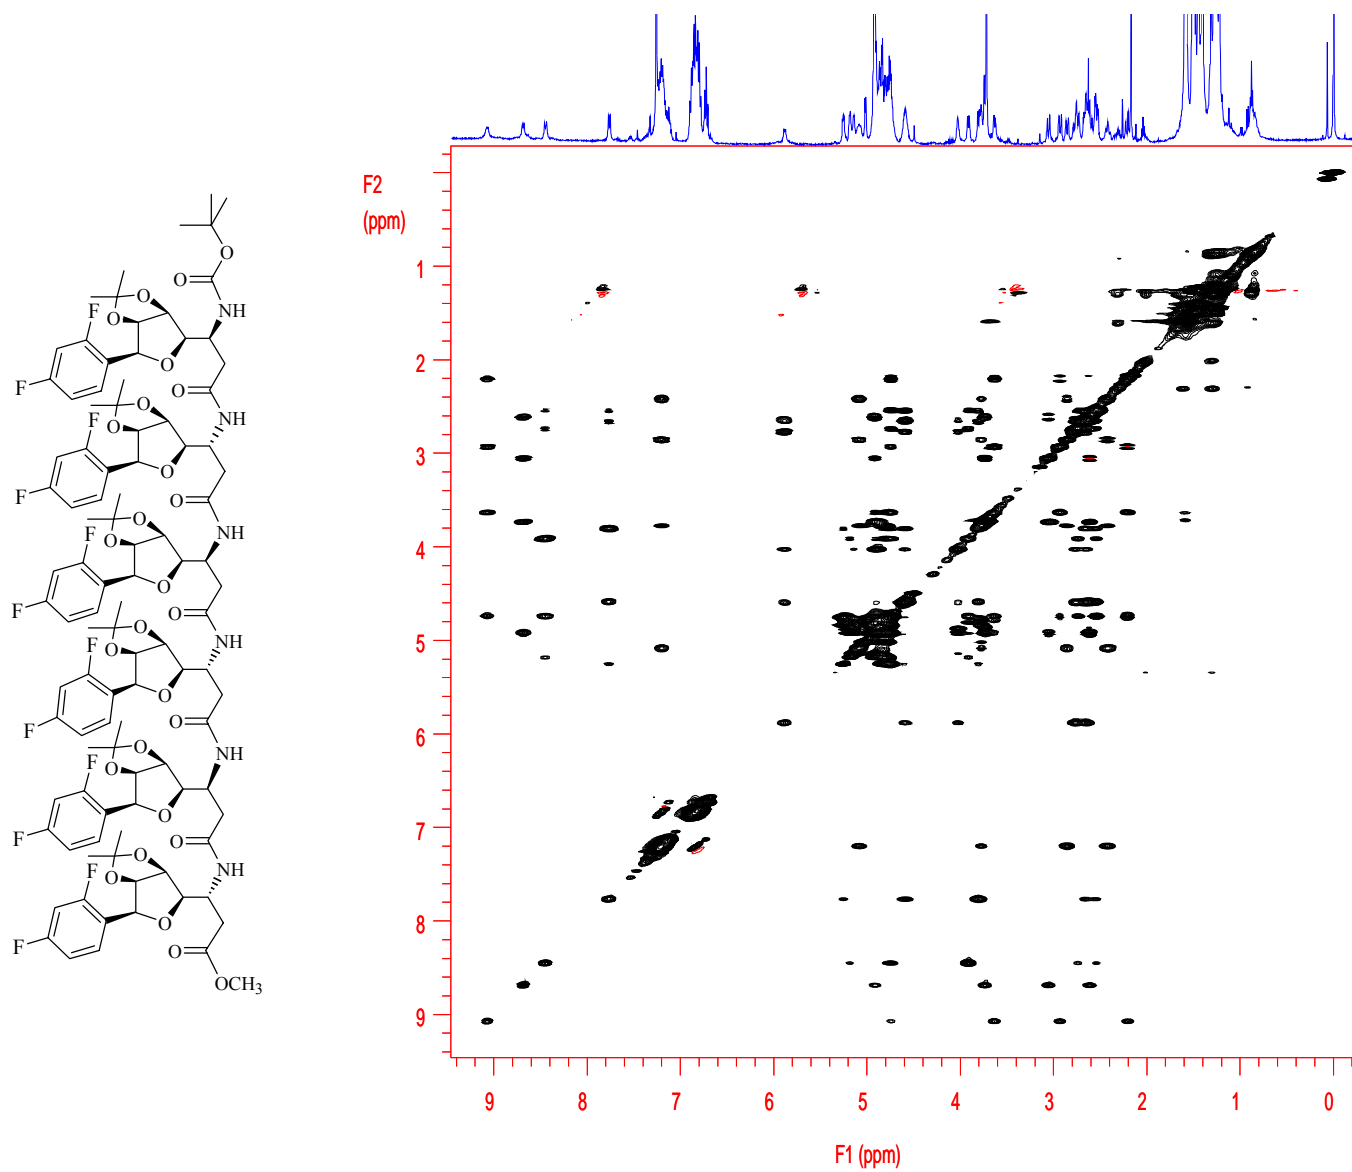

Supporting Fig 95: TOCSY Spectrum of 14 (CDCl<sub>3</sub>, 303 K, 500 MHz)

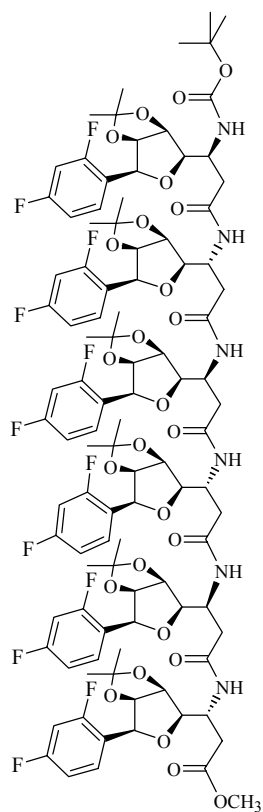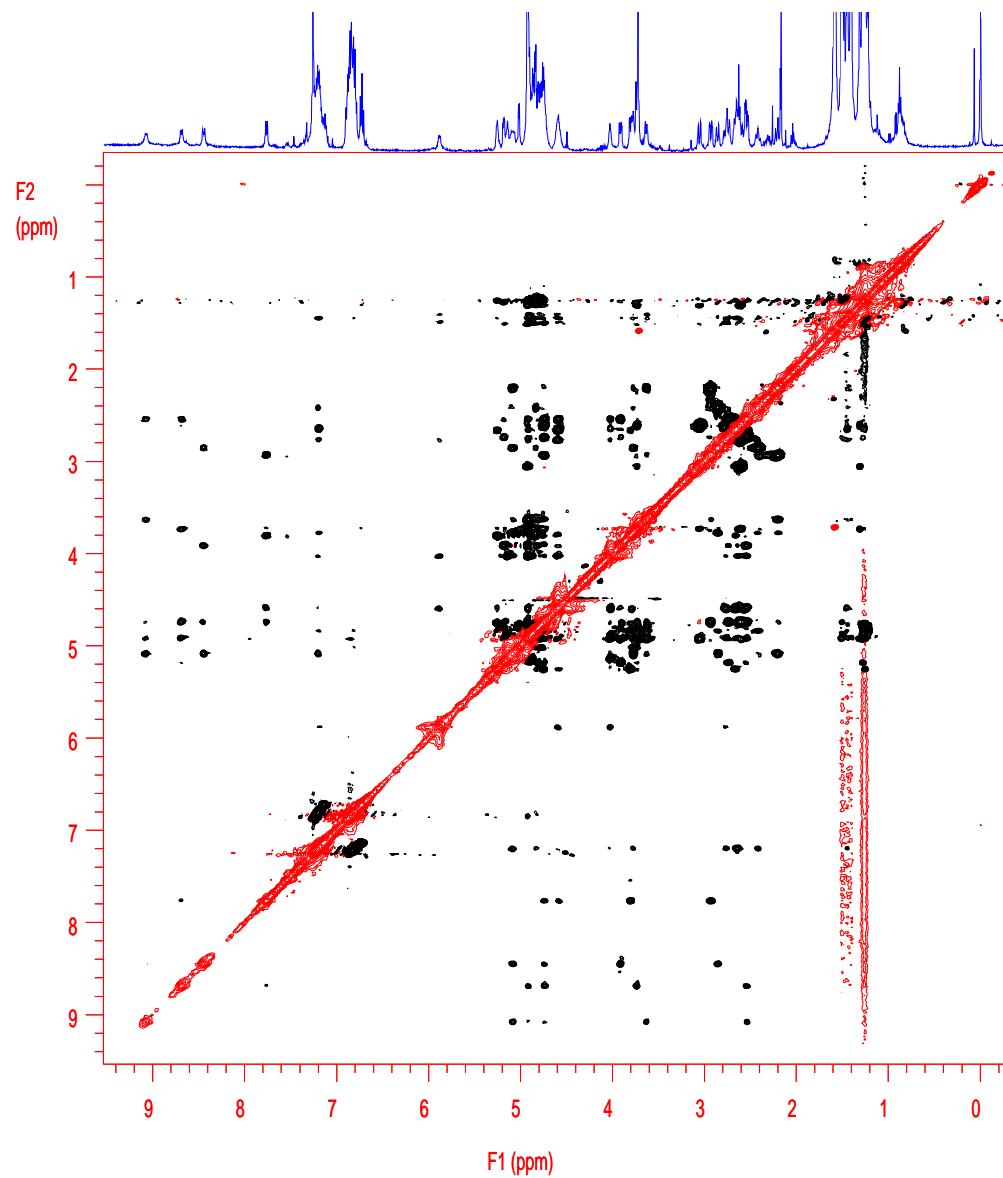

Supporting Fig 96: ROESY Spectrum of 14 (CDCl<sub>3</sub>, 303 K, 500 MHz)

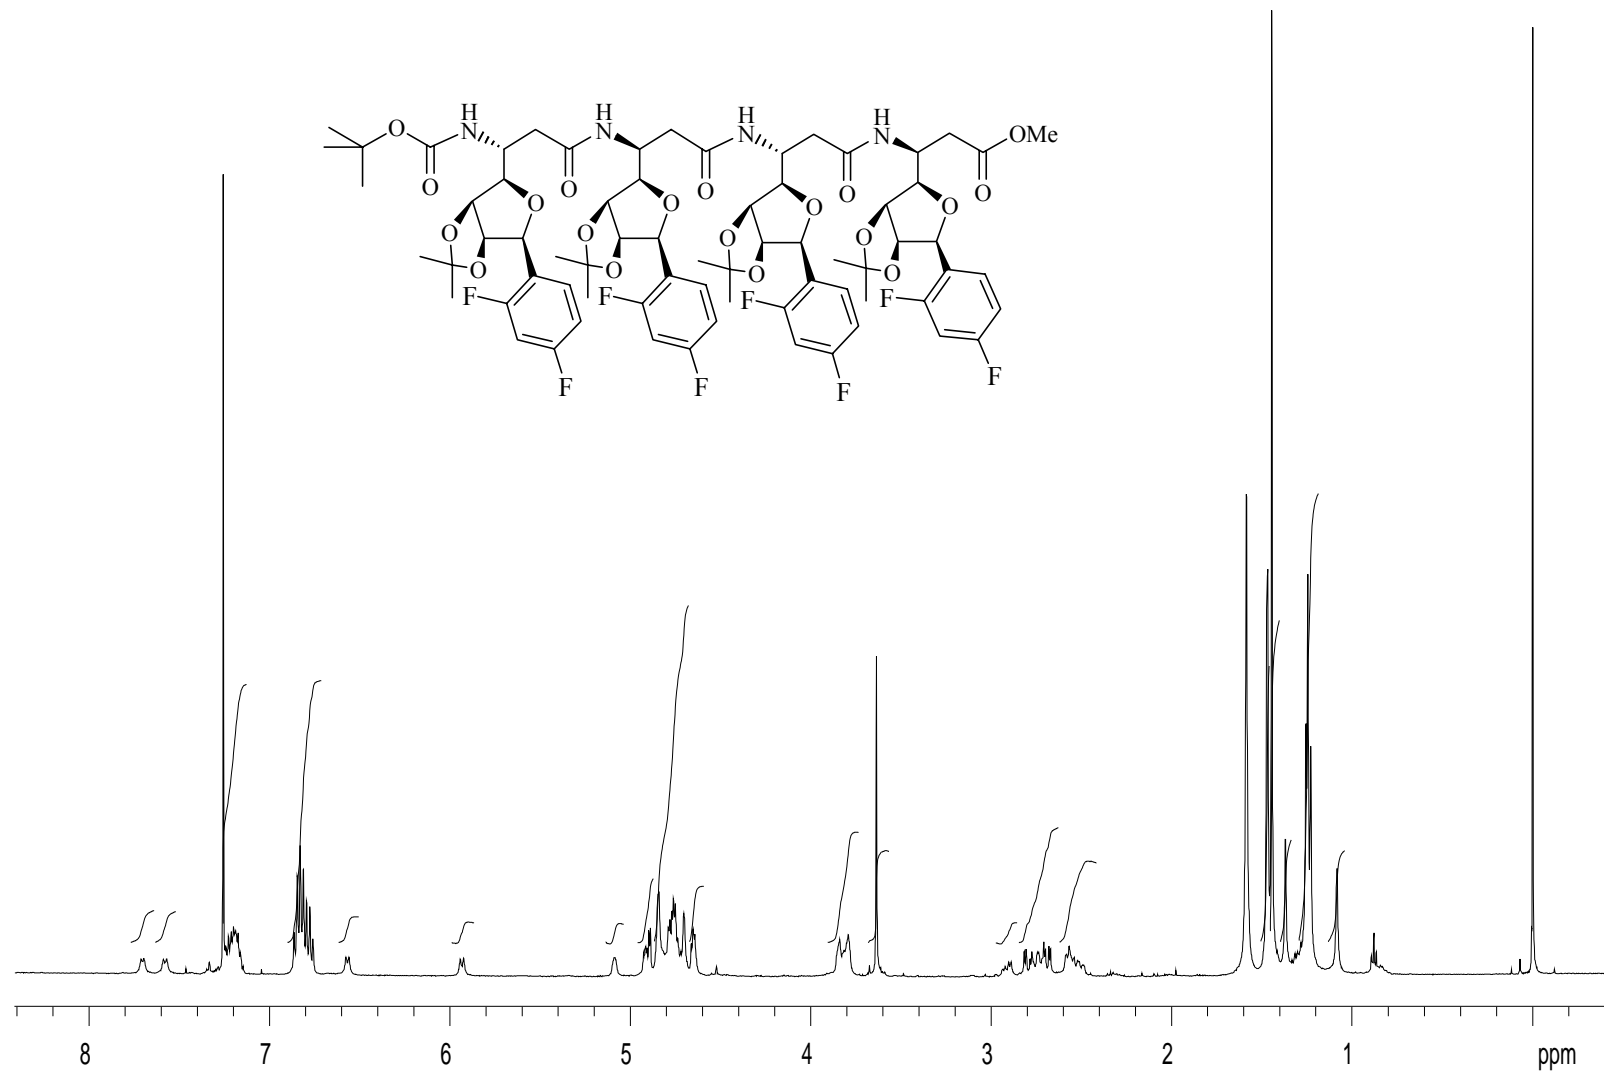

**Supporting Fig 97: <sup>1</sup>H NMR Spectrum of 15 (CDCl<sub>3</sub>, 303 K, 500 MHz)**



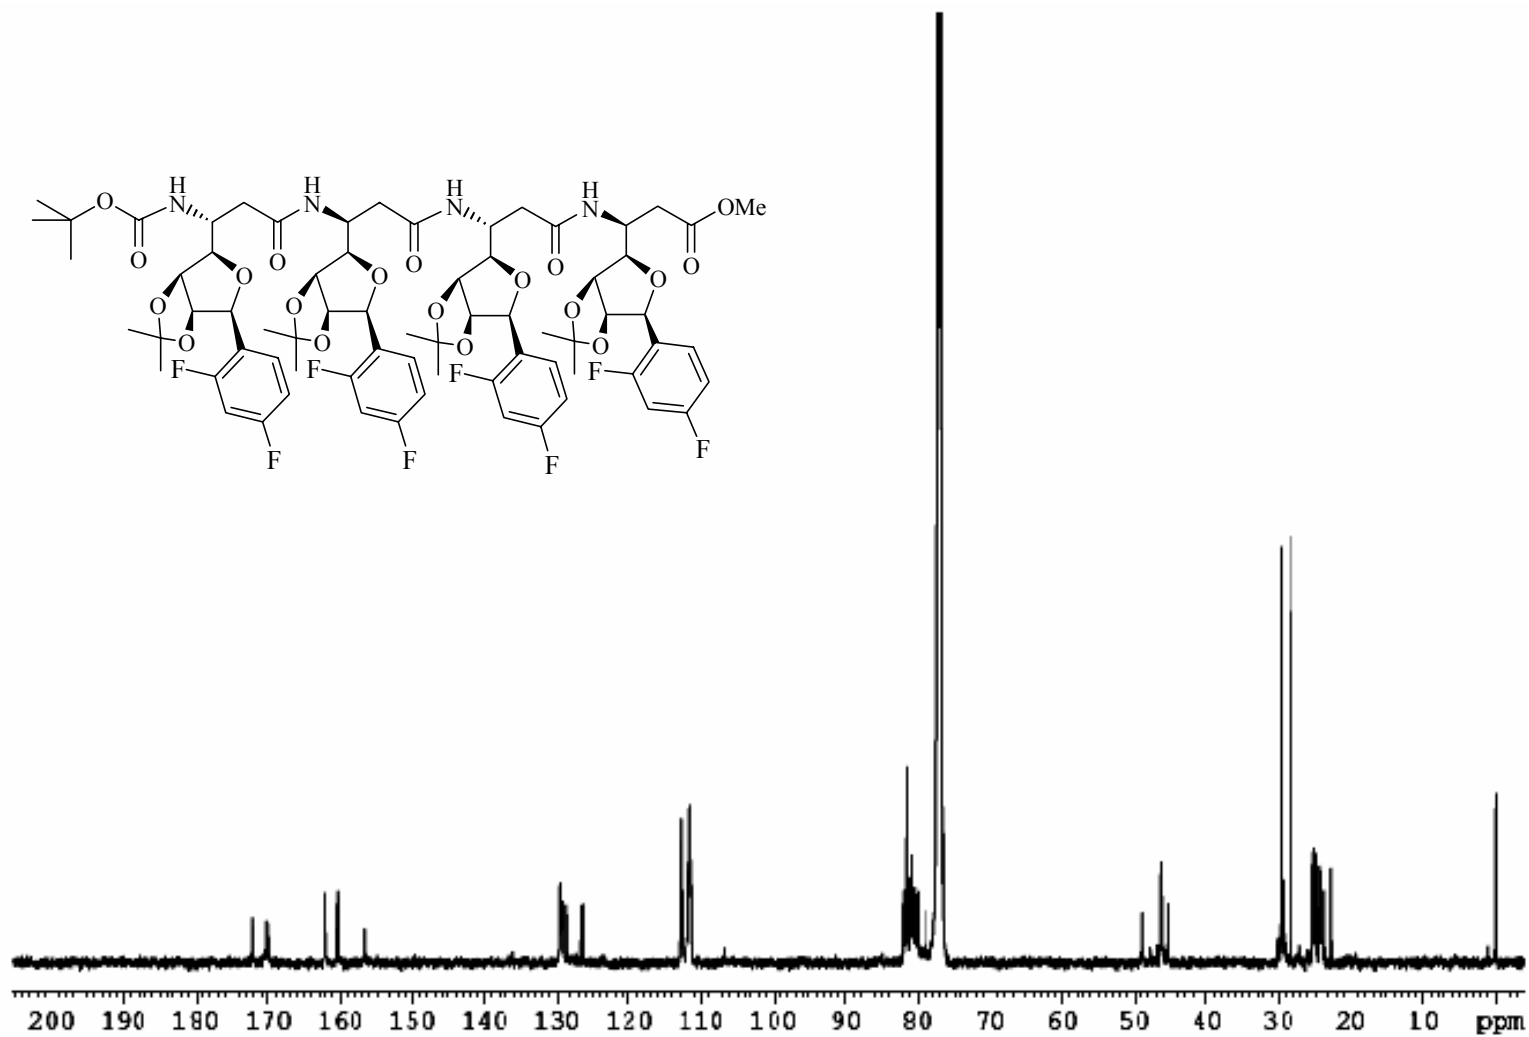

Supporting Fig 98:  $^{13}\text{C}$  NMR Spectrum of 15 ( $\text{CDCl}_3$ , 298 K, 150 MHz)

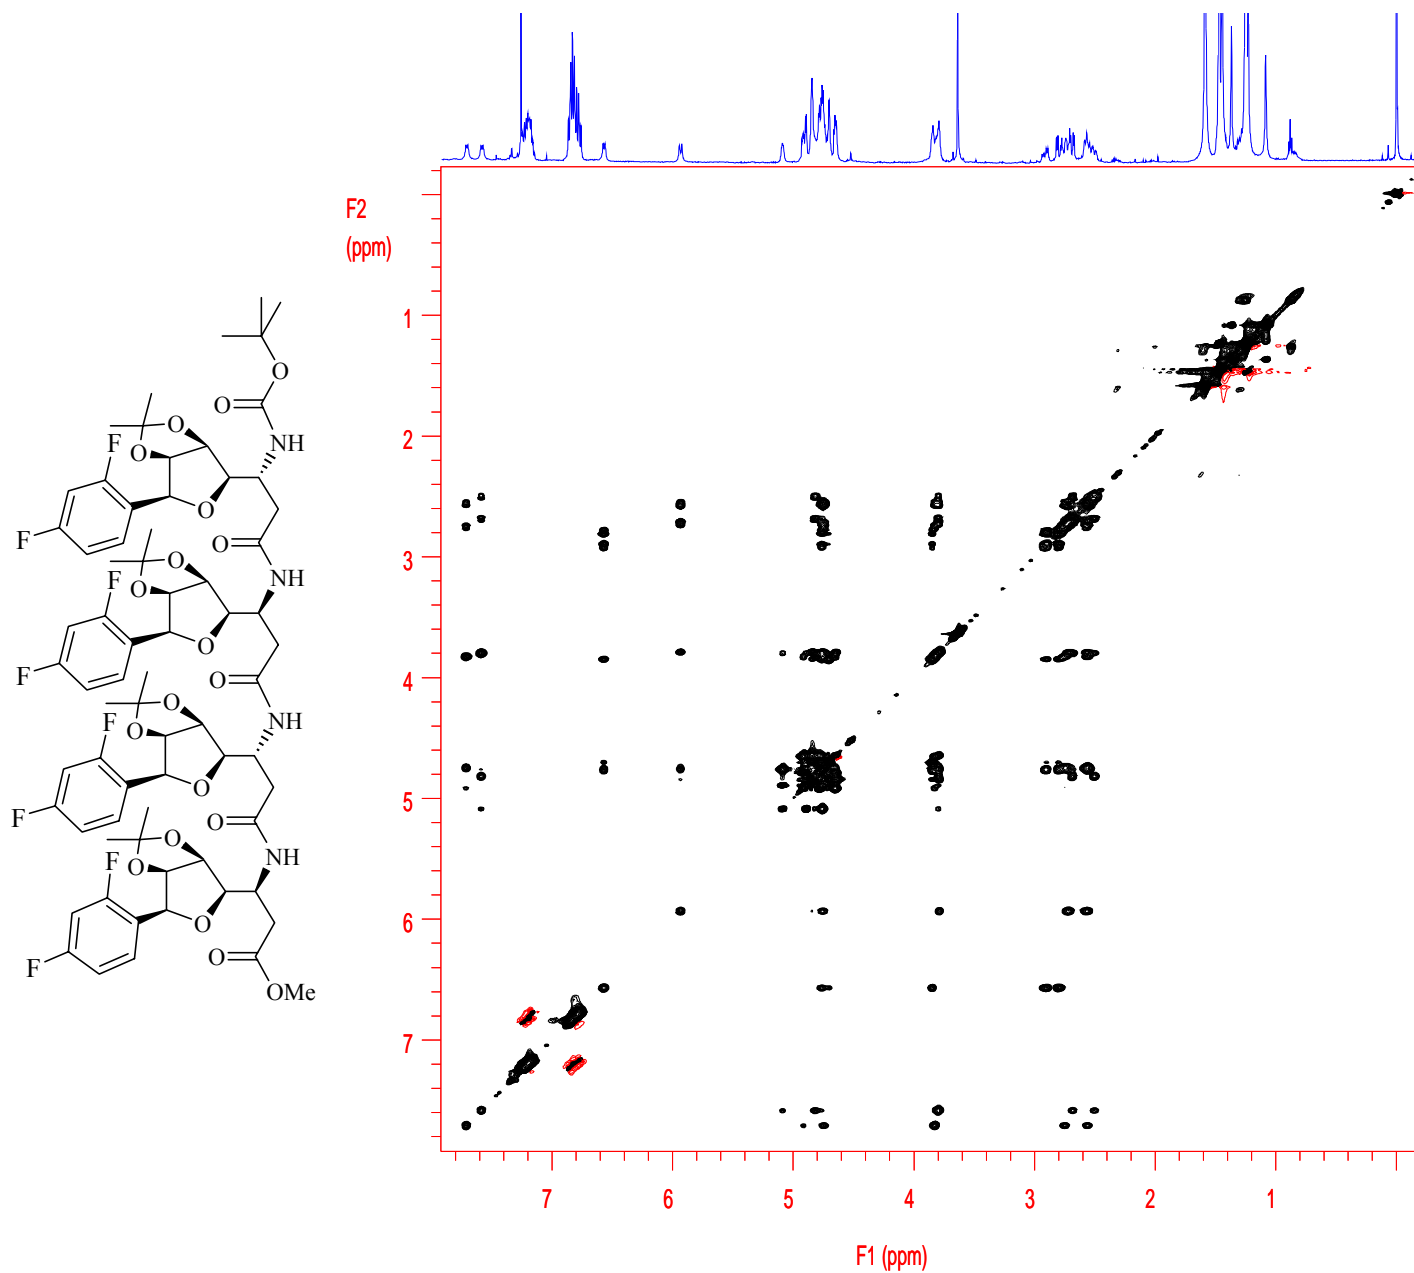

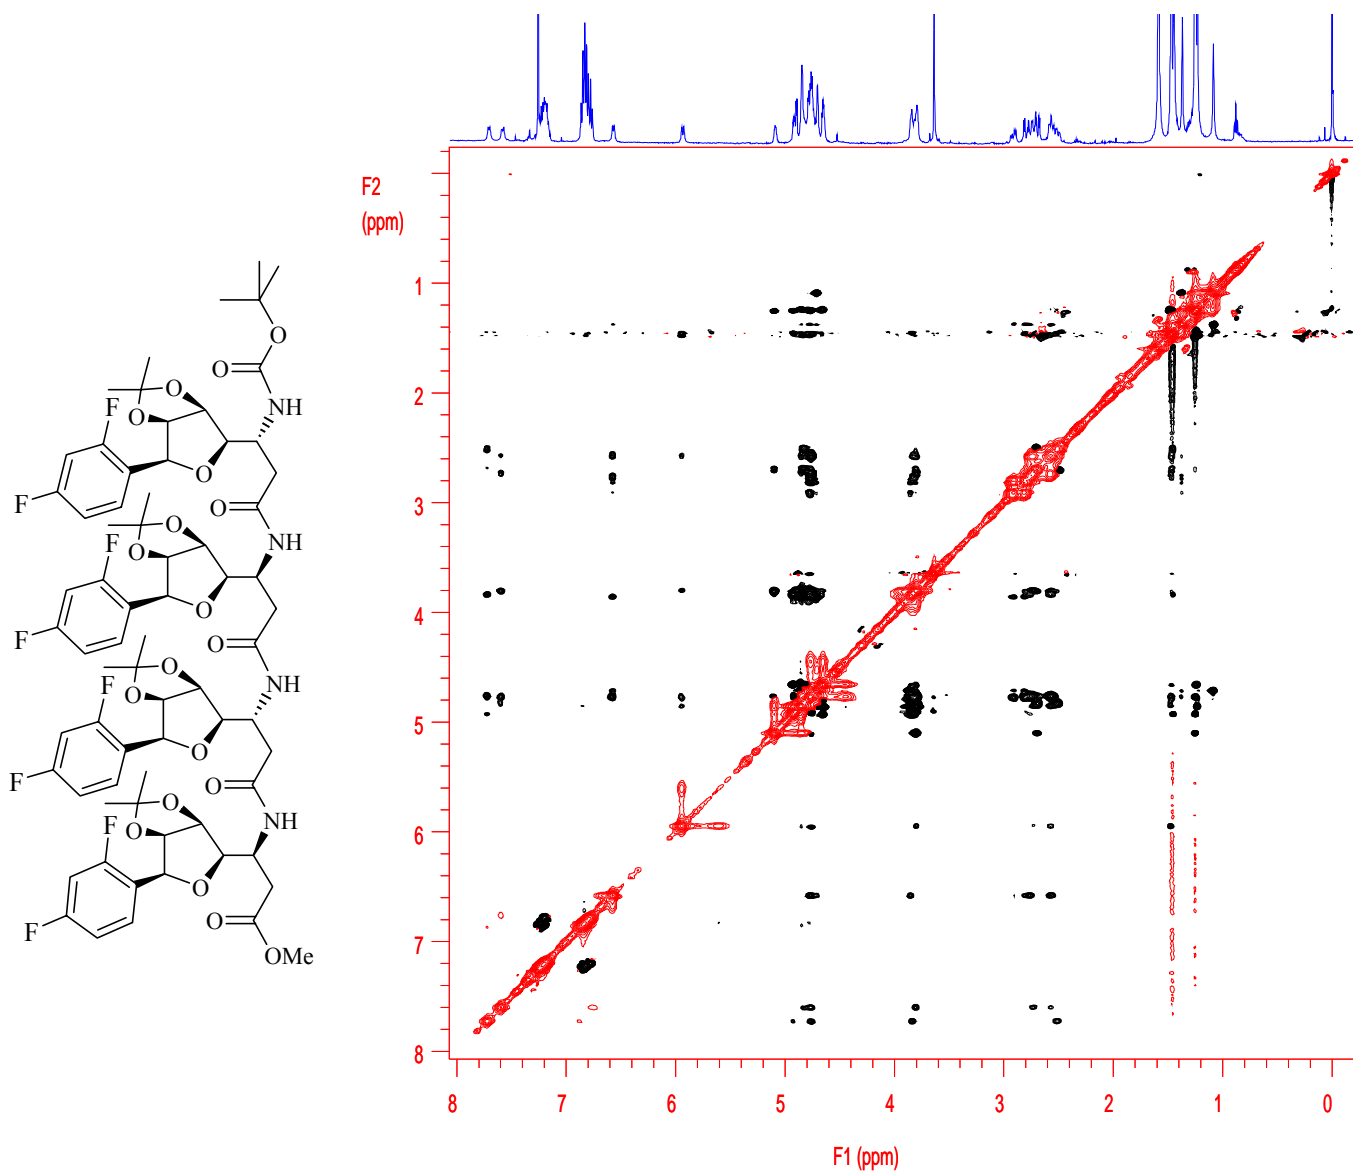

Supporting Fig 100: ROESY Spectrum of 15 (CDCl<sub>3</sub>, 303 K, 500 MHz)

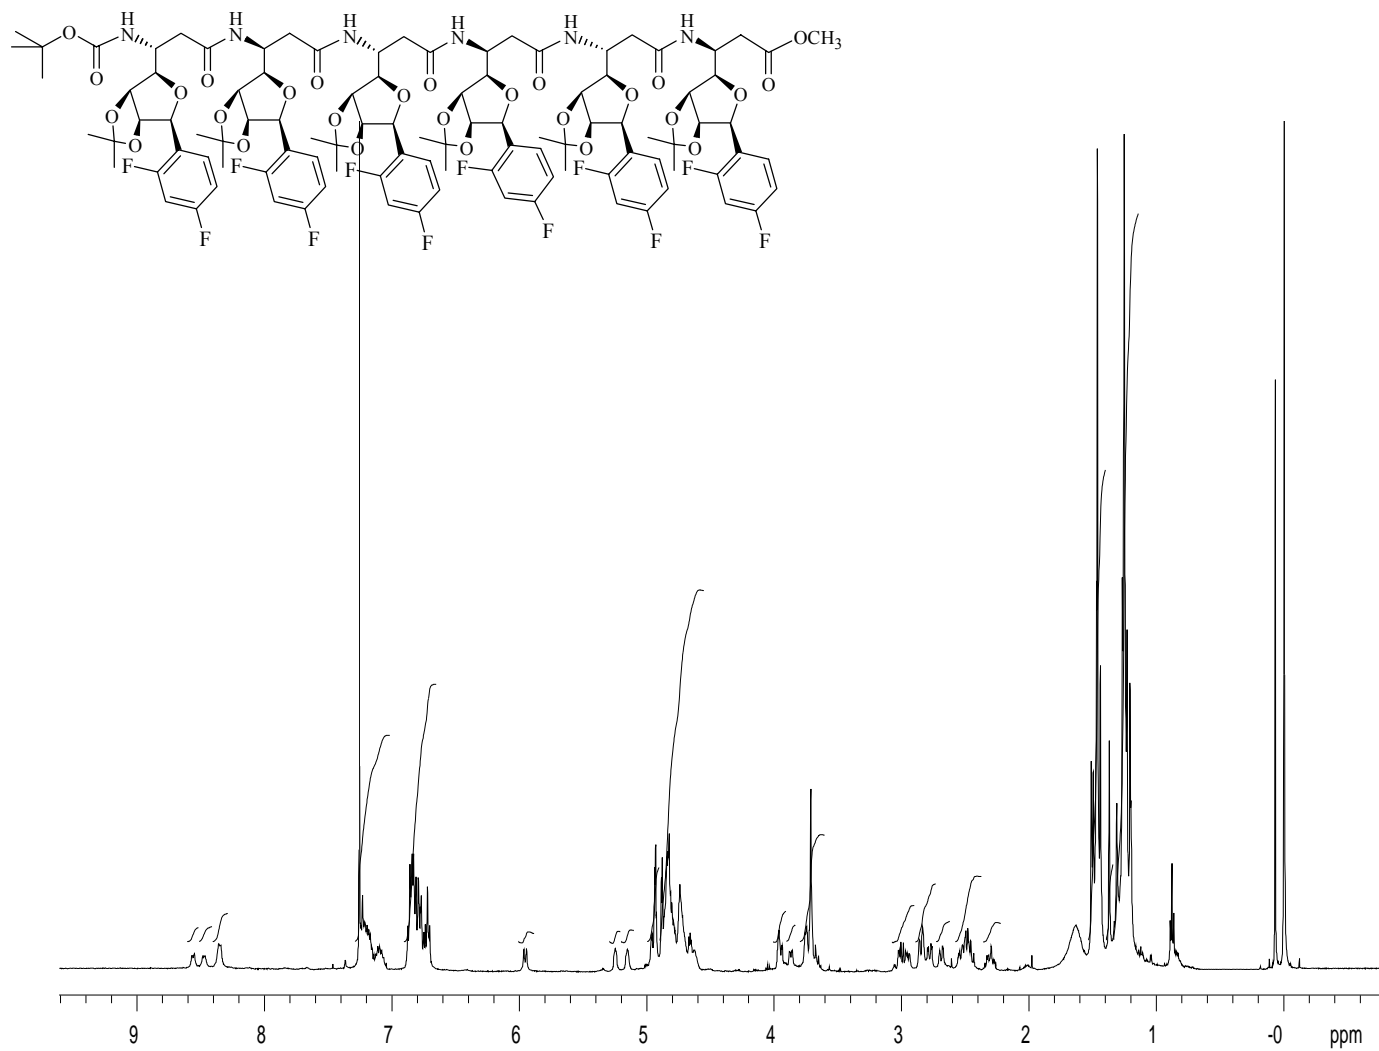

**Supporting Fig 101: <sup>1</sup>H NMR Spectrum of 16 (CDCl<sub>3</sub>, 303 K, 500 MHz)**

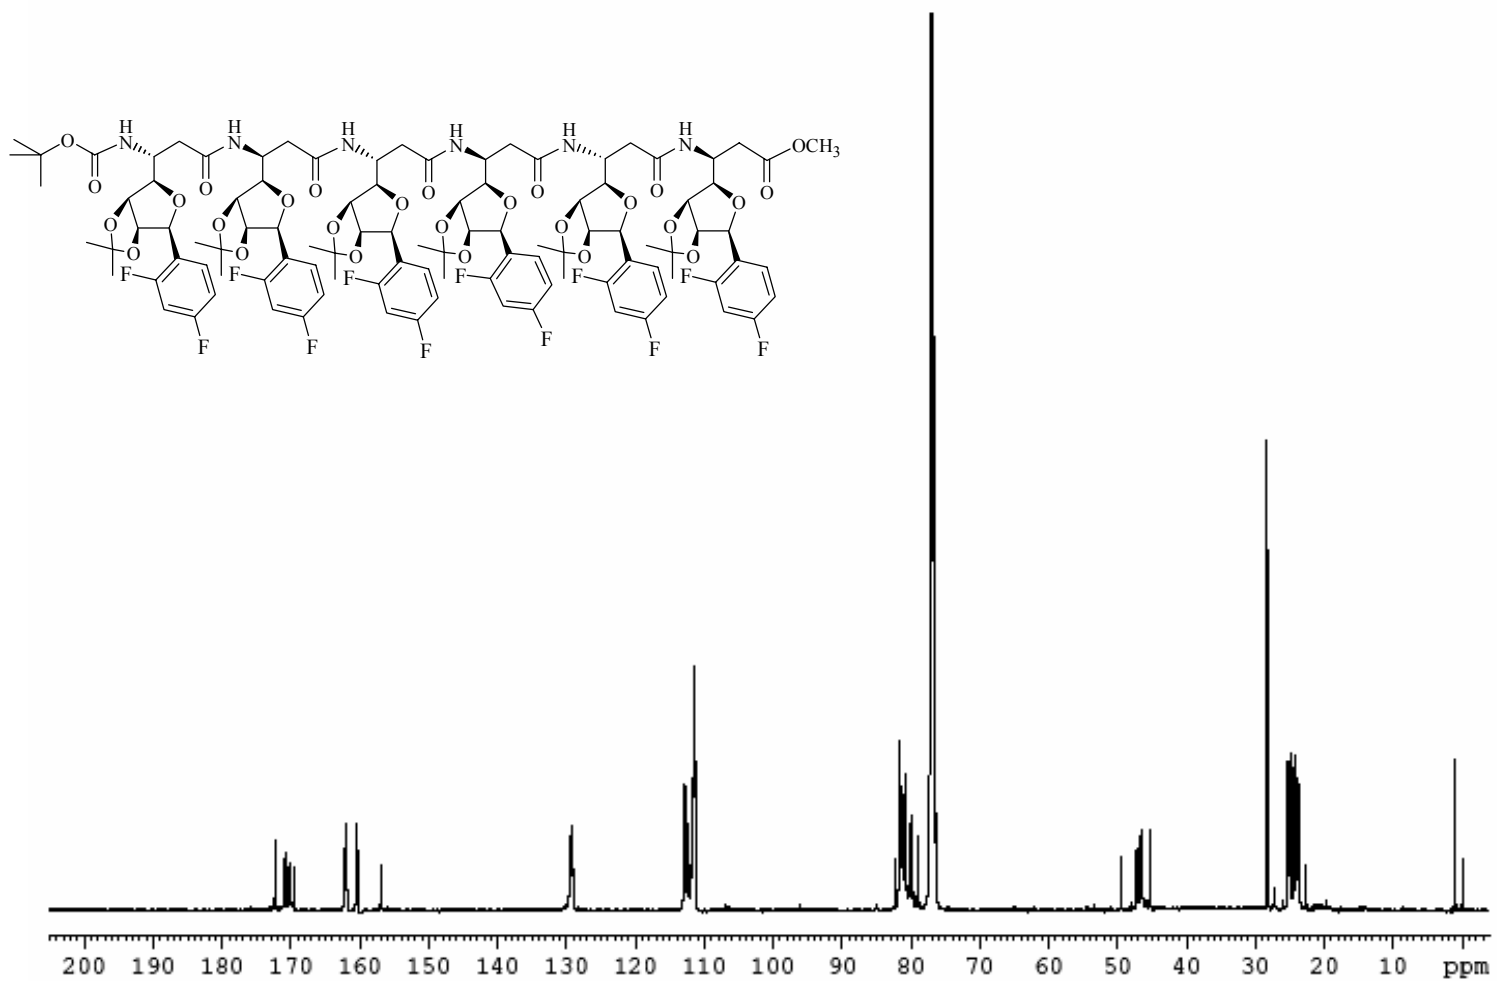

**Supporting Fig 102: <sup>13</sup>C NMR Spectrum of 16 (CDCl<sub>3</sub>, 298 K, 150 MHz)**

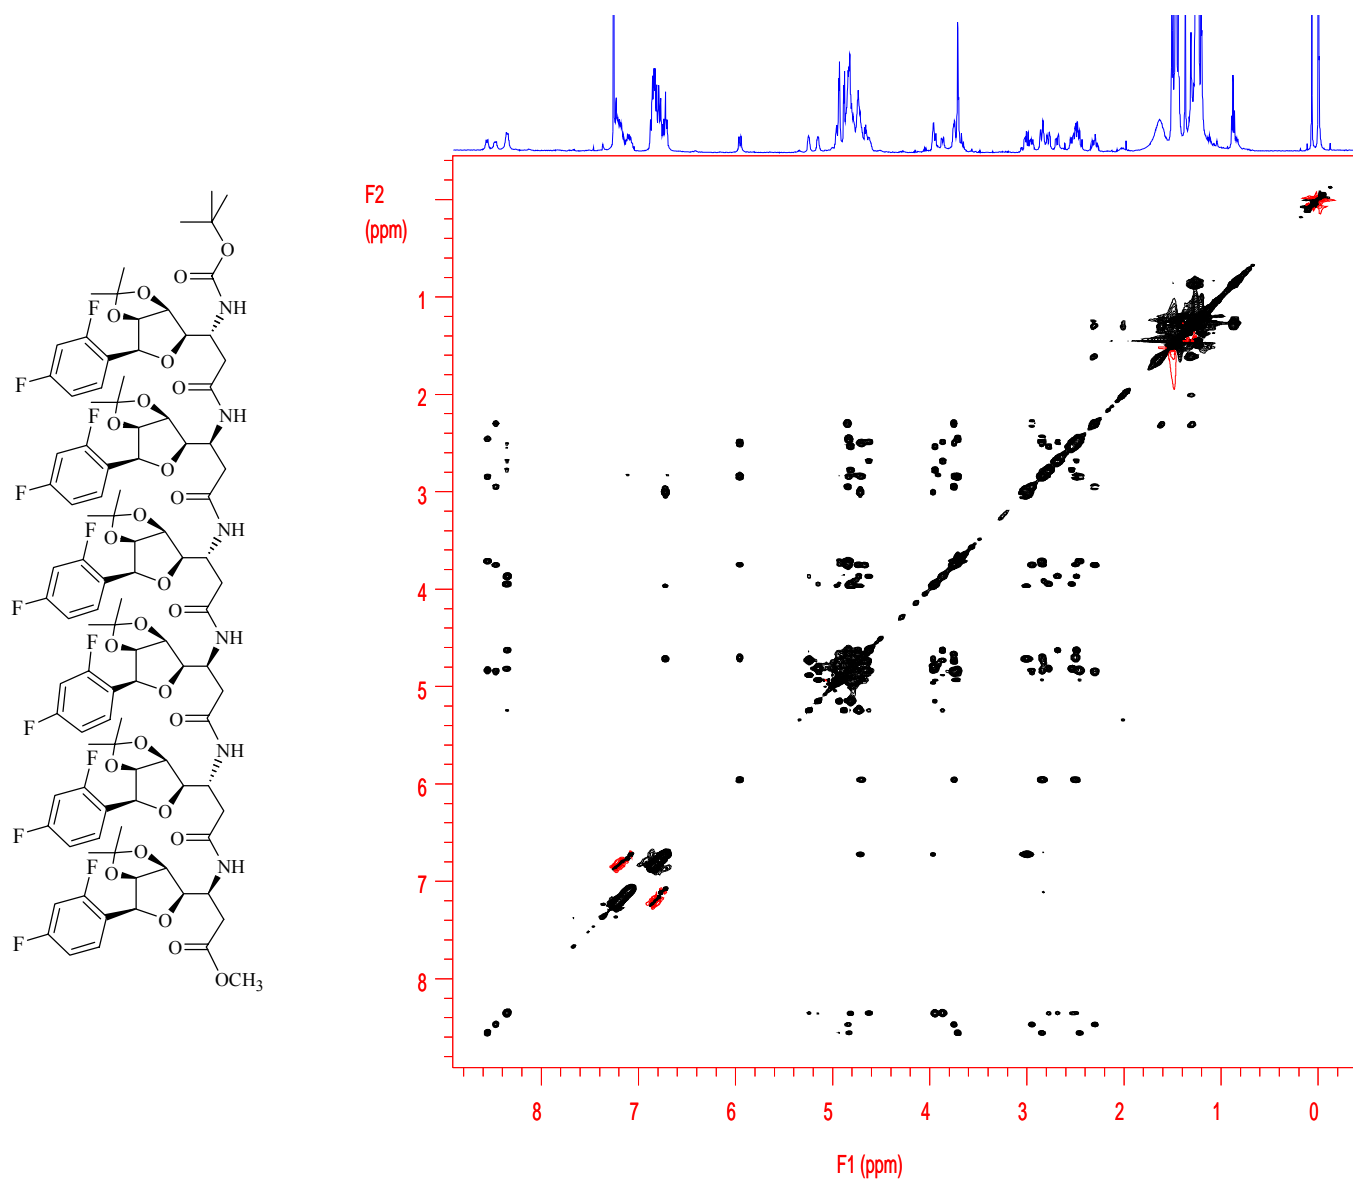

**Supporting Fig 103: TOCSY Spectrum of 16 (CDCl<sub>3</sub>, 303 K, 500 MHz)**

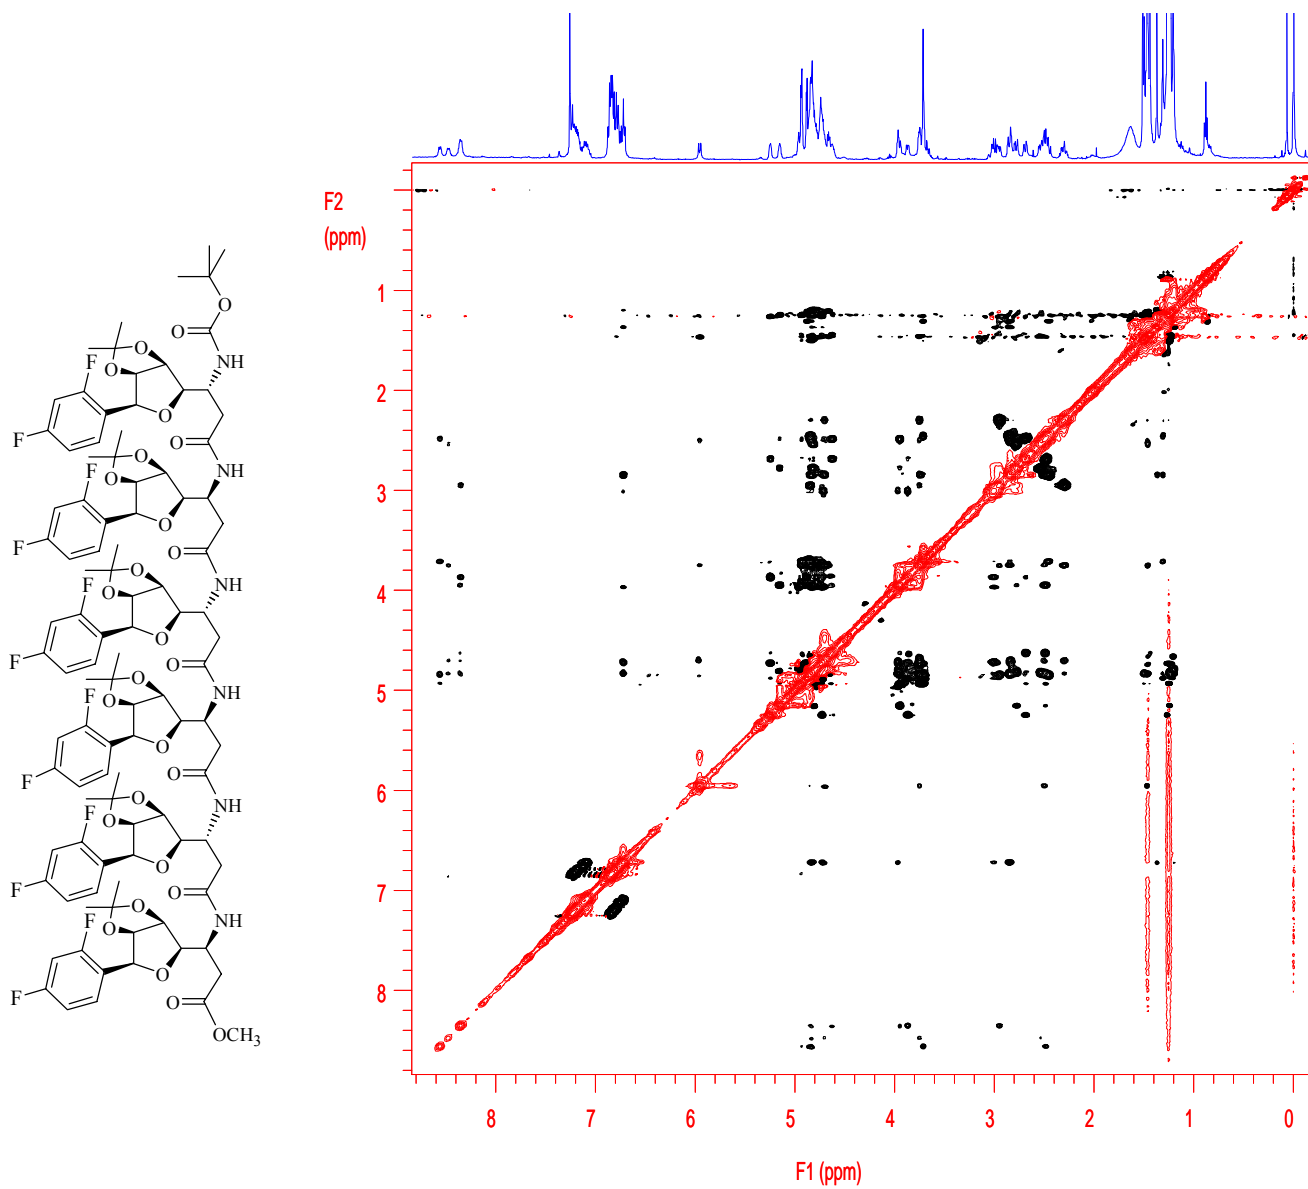

**Supporting Fig 104: ROESY Spectrum of 16 (CDCl<sub>3</sub>, 303 K, 500 MHz)**

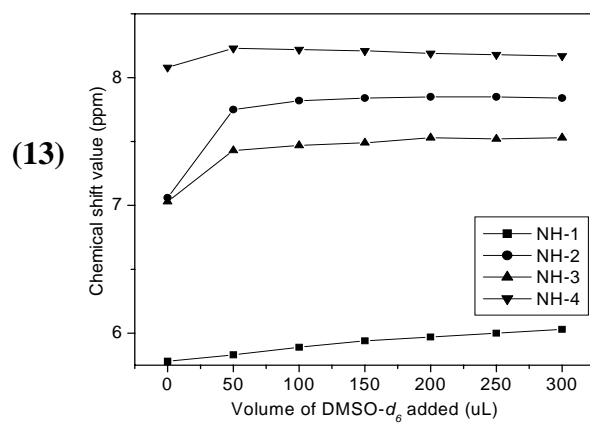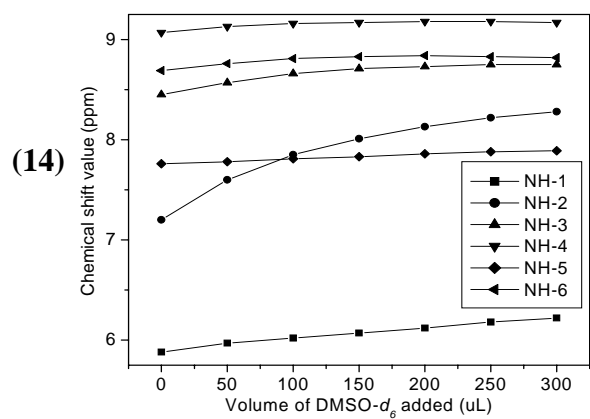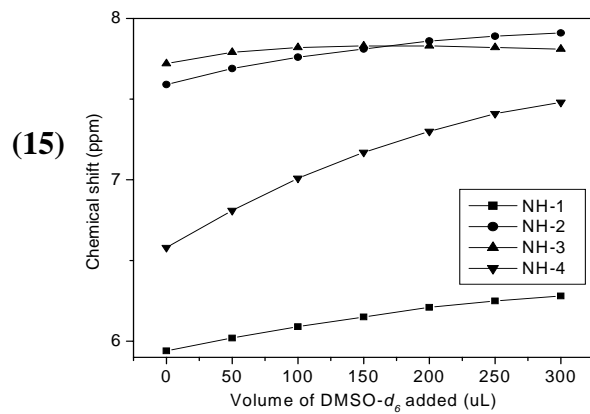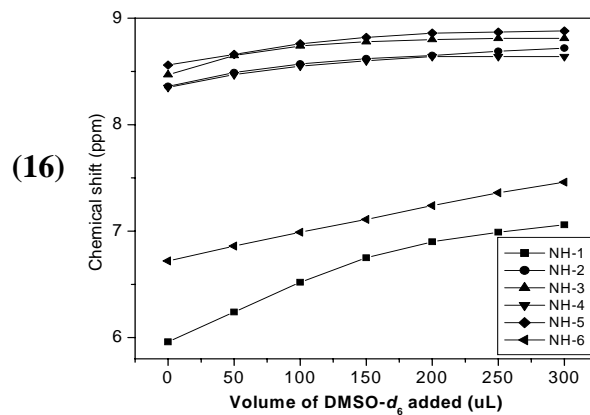

Supporting Fig 105: Solvent titration plots of 13-16



## Molecular Dynamics:

Supporting Fig 106: Superimposed 20 minimum energy structures for 13

(A) side view and (B) top view :

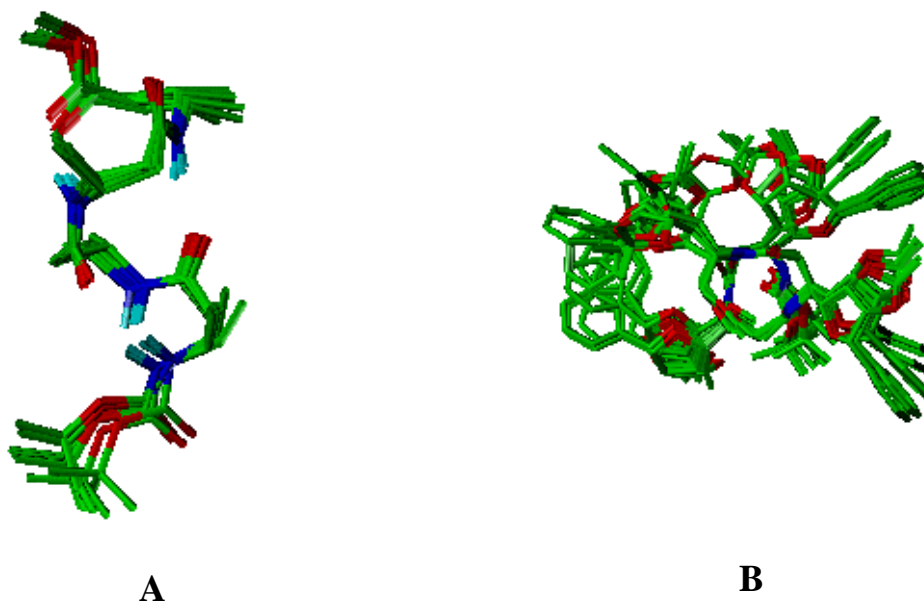

Supporting Table 6: Distance constraints used in MD calculations for 13, derived from ROESY experiment in CDCl<sub>3</sub> (500 MHz, 303 K)

| Residue | Atom                              | Residue | Atom                              | Lower bound | upper bound |
|---------|-----------------------------------|---------|-----------------------------------|-------------|-------------|
| 1       | NH                                | 1       | C <sub>α</sub> H ( <i>pro-S</i> ) | 2.80        | 3.64        |
| 1       | NH                                | 1       | C <sub>α</sub> H ( <i>pro-R</i> ) | 2.77        | 3.64        |
| 1       | NH                                | 2       | NH                                | 2.83        | 3.46        |
| 1       | C <sub>β</sub> H                  | 2       | NH                                | 2.79        | 3.32        |
| 1       | C <sub>α</sub> H ( <i>pro-S</i> ) | 1       | C <sub>4</sub> H                  | 2.83        | 3.46        |

|   |                                |   |                                |      |      |
|---|--------------------------------|---|--------------------------------|------|------|
|   |                                |   |                                |      |      |
| 1 | $C_{\alpha}H$ ( <i>pro-S</i> ) | 1 | $C_3H$                         | 2.41 | 2.94 |
| 1 | $C_{\alpha}H$ ( <i>pro-S</i> ) | 2 | NH                             | 2.89 | 3.07 |
| 1 | $C_{\alpha}H$ ( <i>pro-R</i> ) | 1 | $C_4H$                         | 2.45 | 3.00 |
| 1 | $C_{\alpha}H$ ( <i>pro-R</i> ) | 1 | $C_3H$                         | 2.70 | 3.30 |
| 1 | $C_{\alpha}H$ ( <i>pro-R</i> ) | 2 | NH                             | 2.19 | 2.67 |
| 1 | $C_4H$                         | 2 | NH                             | 2.85 | 3.49 |
| 2 | NH                             | 2 | $C_4H$                         | 2.49 | 3.04 |
| 2 | NH                             | 2 | $C_3H$                         | 2.72 | 3.32 |
| 2 | NH                             | 2 | $C_{\alpha}H$ ( <i>pro-R</i> ) | 2.51 | 3.07 |
| 2 | $C_{\beta}H$                   | 3 | NH                             | 2.35 | 2.88 |
| 2 | $C_{\beta}H$                   | 3 | $C_{\alpha}H$ ( <i>pro-R</i> ) | 2.33 | 2.84 |
| 2 | $C_{\beta}H$                   | 4 | NH                             | 2.72 | 3.33 |
| 2 | $C_{\alpha}H$ ( <i>pro-S</i> ) | 2 | $C_3H$                         | 2.34 | 2.87 |
| 2 | $C_{\alpha}H$ ( <i>pro-S</i> ) | 3 | NH                             | 2.21 | 2.71 |
| 2 | $C_{\alpha}H$ ( <i>pro-R</i> ) | 2 | $C_3H$                         | 2.30 | 2.82 |

|   |                                   |   |                  |      |      |
|---|-----------------------------------|---|------------------|------|------|
| 3 | NH                                | 3 | C <sub>4</sub> H | 2.25 | 2.75 |
| 3 | NH                                | 4 | NH               | 3.13 | 3.83 |
| 3 | C <sub>α</sub> H ( <i>pro-S</i> ) | 3 | C <sub>4</sub> H | 2.52 | 3.08 |
| 3 | C <sub>α</sub> H ( <i>pro-R</i> ) | 3 | C <sub>4</sub> H | 2.88 | 3.52 |
| 3 | C <sub>α</sub> H ( <i>pro-R</i> ) | 4 | NH               | 2.42 | 2.96 |
| 4 | NH                                | 4 | C <sub>4</sub> H | 2.38 | 2.91 |
| 4 | C <sub>α</sub> H ( <i>pro-S</i> ) | 4 | C <sub>4</sub> H | 2.46 | 3.00 |
| 4 | C <sub>α</sub> H ( <i>pro-R</i> ) | 4 | C <sub>4</sub> H | 2.20 | 2.69 |

**Supporting Fig 107: Superimposed 20 minimum energy structures for 14**

(A) side view and (B) top view:

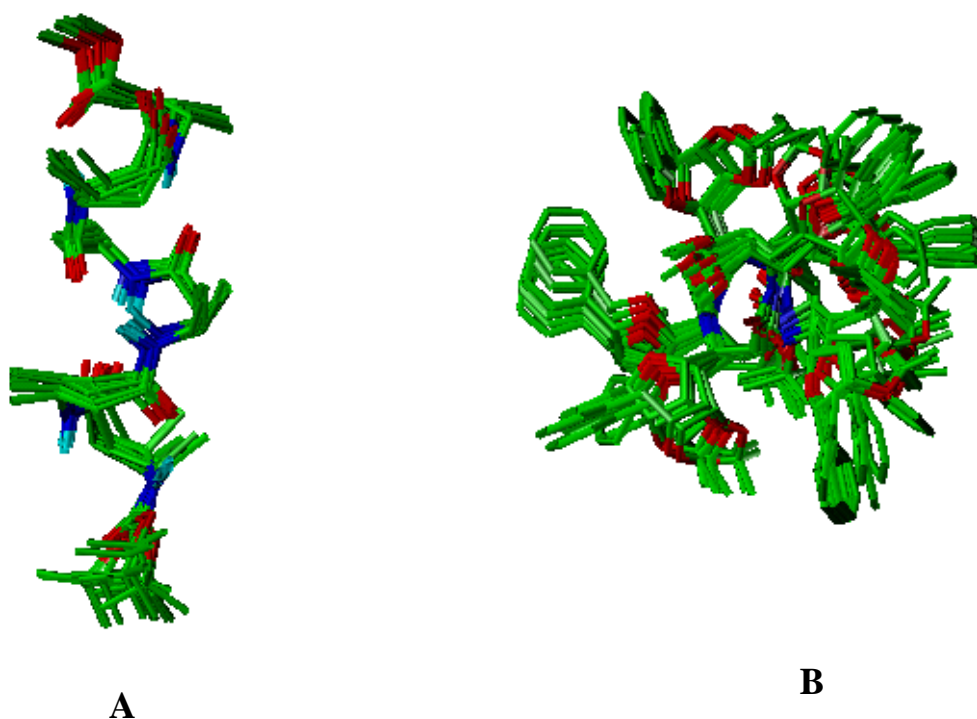

**Supporting Table 7: Distance constraints used in MD calculations for 13, derived from ROESY experiment in  $\text{CDCl}_3$  (500 MHz, 303 K)**

| Residue | Atom                                | Residue | Atom                                | Lower bound | upper bound |
|---------|-------------------------------------|---------|-------------------------------------|-------------|-------------|
| 1       | $\text{C}_\alpha\text{H}_{(pro-R)}$ | 1       | NH                                  | 3.28        | 4.01        |
| 1       | $\text{C}_\alpha\text{H}_{(pro-S)}$ | 1       | NH                                  | 3.09        | 3.78        |
| 1       | $\text{C}_4\text{H}$                | 1       | NH                                  | 2.72        | 3.33        |
| 1       | $\text{C}_3\text{H}$                | 1       | NH                                  | 3.02        | 3.69        |
| 1       | $\text{C}_1\text{H}$                | 1       | $\text{C}_4\text{H}$                | 2.03        | 2.48        |
| 1       | $\text{C}_4\text{H}$                | 1       | $\text{C}_\alpha\text{H}_{(pro-S)}$ | 3.04        | 3.72        |

|   |                                   |   |                                   |      |      |
|---|-----------------------------------|---|-----------------------------------|------|------|
| 1 | C <sub>4</sub> H                  | 1 | C <sub>α</sub> H ( <i>pro-R</i> ) | 2.59 | 3.17 |
| 1 | C <sub>4</sub> H                  | 3 | C <sub>α</sub> H ( <i>pro-R</i> ) | 2.46 | 3.01 |
| 1 | C <sub>α</sub> H ( <i>pro-R</i> ) | 2 | NH                                | 2.45 | 2.99 |
| 1 | C <sub>α</sub> H ( <i>pro-S</i> ) | 2 | NH                                | 2.80 | 3.42 |
| 2 | C <sub>β</sub> H                  | 4 | C <sub>α</sub> H ( <i>pro-R</i> ) | 2.37 | 2.90 |
| 2 | C <sub>1</sub> H                  | 2 | C <sub>4</sub> H                  | 1.89 | 2.13 |
| 2 | C <sub>4</sub> H                  | 2 | C <sub>α</sub> H ( <i>pro-S</i> ) | 2.07 | 2.53 |
| 2 | C <sub>4</sub> H                  | 2 | C <sub>α</sub> H ( <i>pro-R</i> ) | 2.83 | 3.46 |
| 2 | C <sub>α</sub> H ( <i>pro-R</i> ) | 2 | NH                                | 2.86 | 3.50 |
| 2 | C <sub>3</sub> H                  | 2 | C <sub>α</sub> H ( <i>pro-S</i> ) | 2.62 | 3.19 |
| 2 | C <sub>3</sub> H                  | 2 | C <sub>α</sub> H ( <i>pro-R</i> ) | 2.43 | 2.97 |
| 2 | C <sub>4</sub> H                  | 4 | C <sub>α</sub> H ( <i>pro-R</i> ) | 2.77 | 3.38 |
| 2 | C <sub>β</sub> H                  | 3 | NH                                | 2.65 | 3.24 |
| 2 | C <sub>β</sub> H                  | 4 | NH                                | 2.81 | 3.44 |
| 2 | C <sub>α</sub> H ( <i>pro-S</i> ) | 3 | NH                                | 2.56 | 3.13 |
| 3 | C <sub>1</sub> H                  | 3 | C <sub>4</sub> H                  | 2.03 | 2.48 |

|   |                                   |   |                                   |      |      |
|---|-----------------------------------|---|-----------------------------------|------|------|
| 3 | C <sub>4</sub> H                  | 3 | C <sub>α</sub> H ( <i>pro-S</i> ) | 2.74 | 3.35 |
| 3 | C <sub>3</sub> H                  | 3 | C <sub>1</sub> H                  | 2.14 | 2.61 |
| 3 | C <sub>3</sub> H                  | 3 | C <sub>β</sub> H                  | 2.60 | 3.18 |
| 3 | C <sub>4</sub> H                  | 3 | NH                                | 2.43 | 2.96 |
| 3 | NH                                | 4 | NH                                | 3.55 | 4.34 |
| 3 | C <sub>α</sub> H ( <i>pro-R</i> ) | 4 | NH                                | 2.81 | 3.44 |
| 4 | C <sub>3</sub> H                  | 4 | NH                                | 3.24 | 3.96 |
| 4 | C <sub>4</sub> H                  | 4 | NH                                | 2.83 | 3.46 |
| 4 | C <sub>4</sub> H                  | 4 | C <sub>α</sub> H ( <i>pro-S</i> ) | 2.88 | 3.52 |
| 4 | C <sub>4</sub> H                  | 4 | C <sub>α</sub> H ( <i>pro-R</i> ) | 2.27 | 2.77 |
| 4 | C <sub>1</sub> H                  | 4 | C <sub>4</sub> H                  | 1.85 | 2.26 |
| 4 | C <sub>β</sub> H                  | 6 | C <sub>α</sub> H ( <i>pro-R</i> ) | 2.23 | 2.72 |
| 4 | C <sub>β</sub> H                  | 5 | NH                                | 2.73 | 3.33 |
| 4 | C <sub>α</sub> H ( <i>pro-S</i> ) | 5 | NH                                | 2.26 | 2.77 |
| 4 | C <sub>β</sub> H                  | 6 | NH                                | 2.74 | 3.35 |
| 5 | C <sub>3</sub> H                  | 5 | C <sub>1</sub> H                  | 2.56 | 3.12 |

|   |                                   |   |                                   |      |      |
|---|-----------------------------------|---|-----------------------------------|------|------|
|   |                                   |   |                                   |      |      |
| 5 | C <sub>3</sub> H                  | 5 | C <sub>β</sub> H                  | 2.77 | 3.39 |
| 5 | C <sub>3</sub> H                  | 5 | C <sub>α</sub> H ( <i>pro-S</i> ) | 2.21 | 2.70 |
| 5 | C <sub>3</sub> H                  | 5 | C <sub>α</sub> H ( <i>pro-S</i> ) | 2.22 | 2.71 |
| 5 | C <sub>1</sub> H                  | 5 | C <sub>4</sub> H                  | 1.70 | 2.08 |
| 5 | C <sub>4</sub> H                  | 5 | C <sub>α</sub> H ( <i>pro-S</i> ) | 2.68 | 3.28 |
| 5 | C <sub>4</sub> H                  | 5 | NH                                | 2.24 | 2.74 |
| 5 | NH                                | 6 | NH                                | 3.15 | 3.85 |
| 5 | C <sub>α</sub> H ( <i>pro-R</i> ) | 6 | NH                                | 2.72 | 3.33 |
| 6 | C <sub>4</sub> H                  | 6 | NH                                | 2.56 | 3.12 |
| 6 | C <sub>1</sub> H                  | 6 | C <sub>4</sub> H                  | 1.70 | 2.08 |
| 6 | C <sub>4</sub> H                  | 6 | C <sub>α</sub> H ( <i>pro-S</i> ) | 2.46 | 3.01 |
| 6 | C <sub>4</sub> H                  | 6 | C <sub>α</sub> H ( <i>pro-R</i> ) | 3.25 | 3.97 |

**Supporting Fig 108: Superimposed 20 minimum energy structures for 15**

(A) side view and (B) top view:

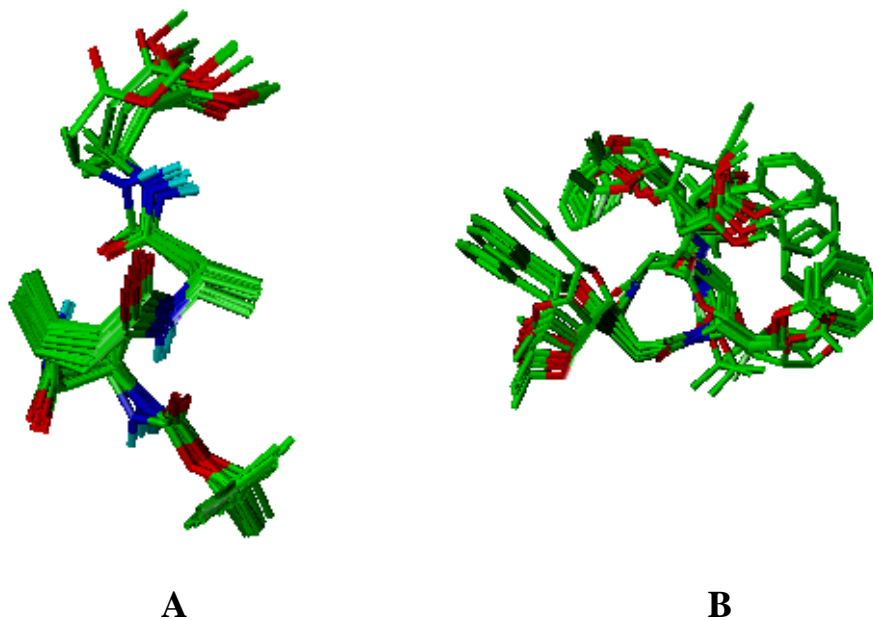

**Supporting Table 8: Distance constraints used in MD calculations for 15, derived from ROESY experiment in CDCl<sub>3</sub> (500 MHz, 303 K)**

| Residue | Atom             | Residue | Atom                              | Lower bound | upper bound |
|---------|------------------|---------|-----------------------------------|-------------|-------------|
| 1       | NH               | 1       | C <sub>α</sub> H ( <i>pro-R</i> ) | 2.43        | 2.97        |
| 1       | NH               | 1       | C <sub>4</sub> H                  | 2.32        | 2.84        |
| 1       | NH               | 2       | C <sub>3</sub> H                  | 2.52        | 3.08        |
| 1       | C <sub>β</sub> H | 2       | NH                                | 2.22        | 2.72        |
| 1       | C <sub>β</sub> H | 3       | NH                                | 2.22        | 2.72        |
| 1       | C <sub>4</sub> H | 1       | C <sub>α</sub> H ( <i>pro-S</i> ) | 1.95        | 2.34        |



|   |                                   |   |                                   |      |      |
|---|-----------------------------------|---|-----------------------------------|------|------|
| 1 | C <sub>4</sub> H                  | 1 | C <sub>α</sub> H ( <i>pro-R</i> ) | 2.11 | 2.57 |
| 1 | C <sub>α</sub> H ( <i>pro-S</i> ) | 2 | NH                                | 2.40 | 2.93 |
| 2 | NH                                | 2 | C <sub>4</sub> H                  | 2.17 | 2.93 |
| 2 | C <sub>3</sub> H                  | 2 | C <sub>α</sub> H ( <i>pro-S</i> ) | 2.06 | 2.51 |
| 2 | C <sub>α</sub> H ( <i>pro-R</i> ) | 3 | NH                                | 2.22 | 2.71 |
| 2 | C <sub>3</sub> H                  | 4 | C <sub>α</sub> H ( <i>pro-R</i> ) | 2.43 | 2.97 |
| 3 | C <sub>4</sub> H                  | 3 | NH                                | 2.56 | 3.16 |
| 3 | C <sub>4</sub> H                  | 3 | C <sub>α</sub> H ( <i>pro-S</i> ) | 2.38 | 2.91 |
| 3 | C <sub>4</sub> H                  | 3 | C <sub>α</sub> H ( <i>pro-R</i> ) | 2.25 | 2.75 |
| 3 | C <sub>4</sub> H                  | 3 | C <sub>1</sub> H                  | 2.06 | 2.51 |
| 3 | C <sub>α</sub> H ( <i>pro-S</i> ) | 4 | NH                                | 2.11 | 2.58 |
| 4 | C <sub>4</sub> H                  | 4 | NH                                | 2.16 | 2.64 |
| 4 | C <sub>3</sub> H                  | 4 | C <sub>α</sub> H ( <i>pro-S</i> ) | 2.48 | 3.03 |
| 4 | C <sub>4</sub> H                  | 4 | C <sub>α</sub> H ( <i>pro-S</i> ) | 2.31 | 2.82 |

**Supporting Fig 109: Superimposed 20 minimum energy structures for 16**

**(A) side view and (B) top view:**

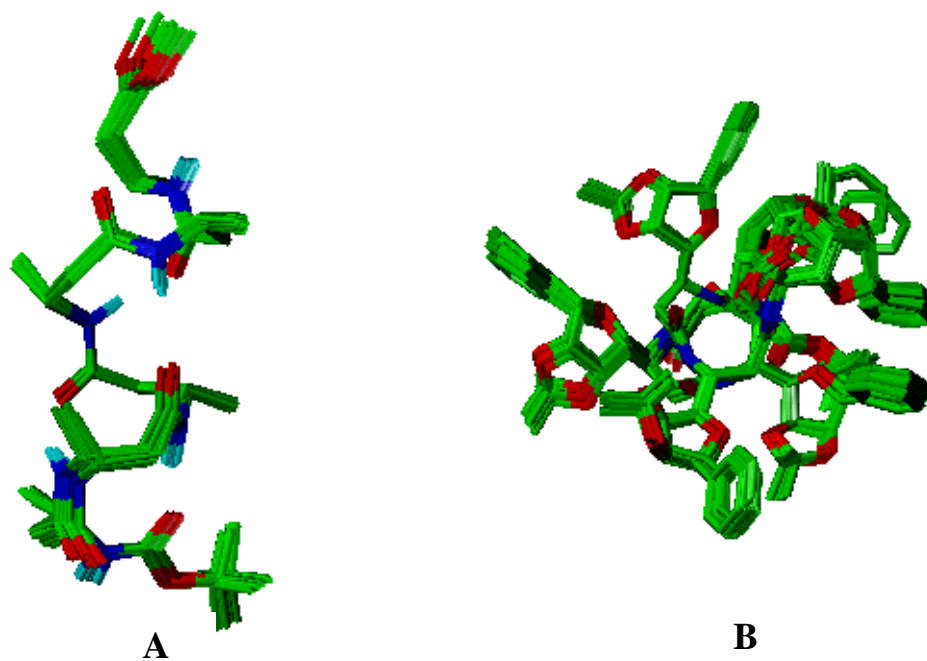

**Supporting Table 9: Distance constraints used in MD calculations for 16, derived from ROESY experiment in CDCl<sub>3</sub> (500 MHz, 303 K)**

| Residue | Atom             | Residue | Atom                              | Lower bound | upper bound |
|---------|------------------|---------|-----------------------------------|-------------|-------------|
| 1       | NH               | 1       | C <sub>α</sub> H ( <i>pro-R</i> ) | 2.44        | 2.98        |
| 1       | NH               | 1       | C <sub>4</sub> H                  | 2.49        | 3.04        |
| 1       | NH               | 2       | C <sub>3</sub> H                  | 2.69        | 3.01        |
| 1       | C <sub>β</sub> H | 2       | NH                                | 2.75        | 3.36        |
| 1       | C <sub>β</sub> H | 3       | NH                                | 2.66        | 3.25        |
| 1       | C <sub>β</sub> H | 3       | C <sub>α</sub> H ( <i>pro-R</i> ) | 2.30        | 2.81        |

|   |                                   |   |                                   |      |      |
|---|-----------------------------------|---|-----------------------------------|------|------|
| 1 | C <sub>4</sub> H                  | 1 | C <sub>α</sub> H ( <i>pro-S</i> ) | 2.07 | 2.53 |
| 1 | C <sub>4</sub> H                  | 1 | C <sub>α</sub> H ( <i>pro-R</i> ) | 2.37 | 2.90 |
| 2 | NH                                | 2 | C <sub>4</sub> H                  | 2.54 | 3.10 |
| 2 | C <sub>4</sub> H                  | 2 | C <sub>α</sub> H ( <i>pro-S</i> ) | 2.49 | 3.04 |
| 2 | C <sub>3</sub> H                  | 2 | C <sub>α</sub> H ( <i>pro-S</i> ) | 2.11 | 2.57 |
| 2 | C <sub>α</sub> H ( <i>pro-R</i> ) | 3 | NH                                | 2.69 | 3.29 |
| 2 | C <sub>β</sub> H                  | 3 | NH                                | 2.58 | 3.26 |
| 2 | C <sub>3</sub> H                  | 4 | C <sub>α</sub> H ( <i>pro-R</i> ) | 2.49 | 3.04 |
| 3 | C <sub>4</sub> H                  | 3 | NH                                | 2.56 | 3.16 |
| 3 | C <sub>4</sub> H                  | 3 | C <sub>α</sub> H ( <i>pro-S</i> ) | 2.34 | 2.87 |
| 3 | C <sub>4</sub> H                  | 3 | C <sub>α</sub> H ( <i>pro-R</i> ) | 2.06 | 2.51 |
| 3 | C <sub>β</sub> H                  | 5 | NH                                | 2.35 | 2.86 |
| 3 | C <sub>β</sub> H                  | 5 | C <sub>α</sub> H ( <i>pro-R</i> ) | 1.96 | 2.39 |
| 3 | C <sub>α</sub> H ( <i>pro-S</i> ) | 4 | NH                                | 2.42 | 2.96 |
| 4 | C <sub>4</sub> H                  | 4 | NH                                | 2.28 | 2.79 |
| 4 | C <sub>α</sub> H ( <i>pro-R</i> ) | 4 | NH                                | 3.13 | 3.83 |

|   |                                   |   |                                   |      |      |
|---|-----------------------------------|---|-----------------------------------|------|------|
| 4 | C <sub>3</sub> H                  | 4 | C <sub>1</sub> H                  | 2.62 | 3.2  |
| 4 | C <sub>3</sub> H                  | 4 | C <sub>α</sub> H ( <i>pro-S</i> ) | 2.01 | 2.46 |
| 4 | C <sub>4</sub> H                  | 4 | C <sub>α</sub> H ( <i>pro-S</i> ) | 2.51 | 3.06 |
| 4 | C <sub>1</sub> H                  | 4 | C <sub>4</sub> H                  | 2.11 | 2.57 |
| 4 | C <sub>3</sub> H                  | 6 | C <sub>α</sub> H ( <i>pro-R</i> ) | 2.69 | 3.28 |
| 4 | C <sub>α</sub> H ( <i>pro-R</i> ) | 5 | NH                                | 2.42 | 2.96 |
| 5 | C <sub>4</sub> H                  | 5 | NH                                | 2.31 | 2.82 |
| 5 | C <sub>3</sub> H                  | 5 | NH                                | 2.67 | 3.27 |
| 5 | C <sub>β</sub> H                  | 6 | NH                                | 2.11 | 2.58 |
| 5 | C <sub>α</sub> H ( <i>pro-S</i> ) | 6 | NH                                | 2.00 | 2.44 |
| 5 | C <sub>α</sub> H ( <i>pro-R</i> ) | 6 | NH                                | 2.82 | 3.45 |
| 5 | C <sub>4</sub> H                  | 6 | C <sub>α</sub> H ( <i>pro-R</i> ) | 2.04 | 2.50 |
| 5 | C <sub>4</sub> H                  | 6 | C <sub>α</sub> H ( <i>pro-S</i> ) | 2.32 | 2.83 |
| 6 | C <sub>4</sub> H                  | 6 | NH                                | 2.35 | 2.87 |
| 6 | C <sub>α</sub> H ( <i>pro-R</i> ) | 6 | NH                                | 2.49 | 3.05 |
| 6 | C <sub>4</sub> H                  | 6 | C <sub>α</sub> H ( <i>pro-S</i> ) | 2.16 | 2.64 |

**Supporting Table 10: Antibacterial activities of peptides 13-16**

| Compounds | MIC (ug/ml)      |         |                    |         |                   |                |
|-----------|------------------|---------|--------------------|---------|-------------------|----------------|
|           | <i>S. aureus</i> |         | <i>E. faecalis</i> |         | <i>E. faecium</i> | <i>E. coli</i> |
|           | DRCC035          | DRCC019 | DRCC034            | DRCC153 | DRCC154           | DRCC018        |
| <b>13</b> | >32              | >32     | >32                | >32     | >32               | >32            |
| <b>14</b> | >32              | >32     | >32                | >32     | >32               | >32            |
| <b>15</b> | >32              | >32     | >32                | >32     | >32               | >32            |
| <b>16</b> | >32              | >32     | >32                | >32     | >32               | >32            |
